# 1 Notch-Induced Endoplasmic Reticulum-Associated Degradation Governs Thymocyte $\beta$ - 2 Selection

3 Xia Liu<sup>1, 2#</sup>, Jingjing Yu<sup>1, 2#</sup>, Longyong Xu<sup>1, 2#</sup>, Katharine Umphred-Wilson<sup>3#</sup>, Fanglue Peng<sup>1, 2</sup>,  
4 Yao Ding<sup>1, 2</sup>, Brendan M Barton<sup>3</sup>, Xiangdong Lv<sup>1</sup>, Michael Y Zhao<sup>1</sup>, Shengyi Sun<sup>4</sup>, Yuning  
5 Hong<sup>5</sup>, Ling Qi<sup>6</sup>, Stanley Adoro<sup>3\*</sup> and Xi Chen<sup>1, 2\*</sup>

6 1. Department of Molecular and Cellular Biology, Baylor College of Medicine, Houston, Texas  
7 77030, USA.

8 2. Lester and Sue Smith Breast Center and Dan L Duncan Comprehensive Cancer Center, Baylor  
9 College of Medicine, Houston, Texas 77030, USA.

10 3. Department of Pathology, School of Medicine, Case Western Reserve University, Cleveland,  
11 Ohio 44106, USA.

12 4. Center for Molecular Medicine and Genetics, Wayne State University, Detroit, MI, USA.

13 5. Department of Chemistry and Physics, La Trobe University, Melbourne, Victoria, Australia.

14 6. Department of Molecular and Integrative Physiology, University of Michigan Medical School,  
15 Ann Arbor, MI, USA.

16 #: These authors contribute equally to this work

## 17 \*Corresponding authors:

18 Stanley Adoro, Ph.D., Department of Pathology, Case Western Reserve University, Cleveland,  
19 OH, USA; Phone 216-368-4712; FAX 216-368-0494; Email: [sxa726@case.edu](mailto:sxa726@case.edu)

20 Xi Chen, Ph.D., Department of Molecular and Cellular Biology, Baylor College of Medicine,  
21 One Baylor Plaza, MS: BCM130, Debakey Building, BCMM-M626, Houston, TX 77030, USA;  
22 Phone 713-798-4398; FAX 713-790-1275; Email: [Xi.Chen@bcm.edu](mailto:Xi.Chen@bcm.edu)

## 23 **Abstract**

24 Signals from the pre-T cell receptor and Notch coordinately instruct  $\beta$ -selection of CD4<sup>-</sup>CD8<sup>-</sup>  
25 double negative (DN) thymocytes to generate  $\alpha\beta$  T cells in the thymus. However, how these  
26 signals ensure a high-fidelity proteome and safeguard the clonal diversification of the pre-  
27 selection TCR repertoire given the considerable translational activity imposed by  $\beta$ -selection is  
28 largely unknown. Here, we identify the endoplasmic reticulum (ER)-associated degradation  
29 (ERAD) machinery as a critical proteostasis checkpoint during  $\beta$ -selection. Expression of the  
30 SEL1L-HRD1 complex, the most conserved branch of ERAD, is directly regulated by the  
31 transcriptional activity of the Notch intracellular domain. Deletion of *Sell1* impaired DN3 to  
32 DN4 thymocyte transition and severely impaired  $\alpha\beta$  T cell development. Mechanistically, *Sell1*  
33 deficiency induced unresolved ER stress that triggered thymocyte apoptosis through the PERK  
34 pathway. Accordingly, genetically inactivating PERK rescued T cell development from *Sell1*-  
35 deficient thymocytes. Our study reveals a critical developmental signal controlled proteostasis  
36 mechanism that enforces T cell development to ensure a healthy adaptive immunity.

37

## 38 **Introduction**

39 T cells develop from bone marrow-derived early T-cell progenitors (ETP) through a series of  
40 well-orchestrated proliferation and differentiation steps in the thymus. In response to intrathymic  
41 interleukin (IL)-7 and Kit ligand, ETPs proliferate and differentiate into CD4<sup>-</sup>CD8<sup>-</sup> double  
42 negative (DN) thymocytes (Freedman-Jeffrey et al., 1997). Subsequent differentiation of DN  
43 thymocytes into CD4<sup>+</sup>CD8<sup>+</sup> (double positive, DP) thymocytes depends on whether DN3 stage  
44 (CD4<sup>+</sup>CD25<sup>+</sup>) thymocytes successfully undergo “ $\beta$ -selection”, the first major checkpoint during  
45  $\alpha\beta$  T cell development (Shah and Zúñiga-Pflücker, 2014).  $\beta$ -selection is initiated by signals from

46 the pre-TCR (a heterodimer of the invariant pre-T $\alpha$  and TCR $\beta$  proteins) in DN3 thymocytes that  
47 have productively undergone V(D)J recombination at the *Tcrb* locus (Mallick et al., 1993;  
48 Michie and Zúñiga-Pflücker, 2002). In addition to cell autonomous signal through the pre-TCR,  
49  $\beta$ -selection also requires signal from the Notch receptor (Ciofani and Zúñiga-Pflücker, 2005;  
50 Sambandam et al., 2005). Coordinately, pre-TCR and Notch signals induce DN3 thymocytes to  
51 undergo 100-200 fold clonal expansion (Yamasaki et al., 2006; Zhao et al., 2019) as they  
52 differentiate into DN4 (CD44<sup>+</sup>CD25<sup>-</sup>) cells which give rise to the DP thymocyte precursors of  
53 mature  $\alpha\beta$  T cells. This proliferative burst is crucial for the diversification of the pre-selection  
54 TCR repertoire (Kreslavsky et al., 2012) and so must be robustly buffered to ensure adequate  
55 number of thymocytes audition for positive selection.  $\beta$ -selection imposes a considerable  
56 demand for new protein synthesis of the newly rearranged *Tcrb* gene and the multiple factors  
57 that execute the transcriptional and metabolic programs demanded by DN thymocyte  
58 proliferation. However, how proteome homeostasis or “proteostasis” is regulated during  
59 thymocyte development is largely unknown.

60 Endoplasmic reticulum (ER) is the major subcellular site for synthesis and maturation of  
61 all transmembrane and secreted proteins. Protein folding is an inherently error-prone process and  
62 is tightly regulated by a myriad of chaperones and enzymes (Balchin et al., 2016; Cox et al.,  
63 2018). To maintain proteostasis and normal cell function, cells have evolved highly sensitive and  
64 sophisticated quality control systems to ensure the fidelity of protein structure, which is  
65 especially important for thymocytes undergoing  $\beta$ -selection that must repair protein damage and  
66 generate a functional and diverse repertoire of T cell receptors with high fidelity (Feige et al.,  
67 2015; Feige and Hendershot, 2013). Two such systems conserved across different species are  
68 ER-associated degradation (ERAD) and the unfolded protein response (UPR) (**Figure 1 - figure**

69 **supplement 1A)** (Brodsky, 2012; Hwang and Qi, 2018; Walter and Ron, 2011). ERAD is the  
70 principal protein quality control mechanism responsible for targeting misfolded proteins in the  
71 ER for cytosolic proteasomal degradation. The E3 ubiquitin ligase HRD1 and its adaptor protein  
72 SEL1L, constitute the most conserved branch of ERAD (Brodsky, 2012; Qi et al., 2017;  
73 Ruggiano et al., 2014; Sun et al., 2014). SEL1L recruits misfolded proteins bound by ER protein  
74 chaperones to the SEL1L-HRD1 complex, through which the misfolded proteins are  
75 retrotranslocated into cytosol, ubiquitinated and degraded by the proteasome in the cytosol with  
76 the help of CDC48/ p97 (Brodsky, 2012; Nakatsukasa and Brodsky, 2008). Failure to clear the  
77 misfolded proteins in the ER activates the UPR (Brodsky, 2012; Hwang and Qi, 2018; Ruggiano  
78 et al., 2014). The UPR is a highly conserved, three-pronged pathway that is activated when the  
79 rate of cellular protein production exceeds the capacity of the ER to correctly fold and process its  
80 protein load or by various intracellular and extracellular stressors that interfere with the protein  
81 folding process. This coordinated response is mediated by three ER-localized transmembrane  
82 sensors: IRE1 $\alpha$ , ATF6 $\alpha$ , and PERK (Hetz et al., 2011). Under ER stress, IRE1 $\alpha$  undergoes  
83 oligomerization and *trans*-autophosphorylation to activate its RNase domain to induce  
84 unconventional splicing of its substrate XBP1 (Walter and Ron, 2011). ER stress also induces  
85 PERK-dependent eIF2 $\alpha$  phosphorylation and subsequent increased cap-independent translation  
86 of ATF4 and induction of CHOP (**Figure 1 - figure supplement 1A**) (Hwang and Qi, 2018;  
87 Walter and Ron, 2011).

88 Here, we show that ERAD, but not the UPR, is the master regulator of physiological ER  
89 proteostasis in immature DN thymocytes. The ERAD machinery was critically required for  
90 successful  $\beta$ -selection of DN3 thymocytes and consequently, ERAD deficiency impeded  $\alpha\beta$  T  
91 cell development. Intriguingly, ERAD selectively preserves the cellular fitness of  $\alpha\beta$ , but not  $\gamma\delta$

92 T lymphocytes. We found that Notch signaling directly regulates ERAD gene expression to  
93 promote the integrity of ER proteostasis during  $\beta$ -selection. Activation of ERAD restricts PERK-  
94 dependent cell death in DN3 thymocytes during  $\beta$ -selection. Genetic inactivation of *Perk* rescued  
95  $\beta$ -selection in *Sell1*-deficient thymocytes.

96

## 97 **Results**

### 98 **Stringent protein quality control in $\beta$ -selected thymocytes**

99 To determine translational dynamics in developing thymocytes, we injected wildtype C57BL/6  
100 (WT) mice with O-propargyl puromycin (OP-Puro), a cell-permeable puromycin analog that is  
101 incorporated into newly synthesized proteins as a measure of protein synthesis rates (Jose and  
102 Signer, 2019; Tong et al., 2020). Animals were euthanized one hour after OP-Puro injection and  
103 thymocyte subsets (gated as shown in **Figure 1 - figure supplement 1B, C**) were assessed by  
104 flow cytometry for OP-Puro incorporation (**Figure 1A**). Compared to DP and mature single  
105 positive thymocytes, DN2 to DN4 thymocytes incorporated the most OP-Puro (**Figure 1B**), a  
106 likely reflection of their high metabolic and proliferative activity (Carpenter and Bosselut, 2010;  
107 Kreslavsky et al., 2012; Nagelreiter et al., 2018). To assess the relationship between translational  
108 activity and proteome quality, we stained WT thymocytes with tetraphenylethene maleimide  
109 (TMI), a cell-permeable reagent that only fluoresces when bound to free thiol groups typically  
110 exposed on misfolded or unfolded proteins (Chen et al., 2017; Jose et al., 2020). Intriguingly,  
111 despite comparable and high protein synthesis rates across DN2 to DN4 thymocytes, we found  
112 that DN4 thymocytes displayed markedly lower levels of misfolded/unfolded proteins (**Figure**  
113 **1C**). These observations suggested that the DN3-to-DN4 transition, which is initiated by  $\beta$ -  
114 selection, is accompanied by induction of proteome quality control mechanisms.

115 To understand the protein quality control mechanisms operating in thymocytes, we  
116 performed quantitative PCR to determine expression of genes encoding ER protein quality  
117 control machinery. We found elevated expression of the core ERAD (*Sel1l*) and the UPR (*Xbp1*,  
118 *Ddit3* (*Chop*), *Atf4*, *Dnajb9*, and *Bip*) genes in DN3 thymocytes (**Figure 1D**). Notably, induction  
119 of these genes peaked in the DN3 thymocyte stage in which  $\beta$ -selection is initiated (Takahama,  
120 2006) and preceded the reduction of misfolded/unfolded proteins in DN4 cells. These results  
121 prompted us to hypothesize and explore whether  $\beta$ -selection signals induce proteome quality  
122 control mechanisms in DN3 cells to enable subsequent stages of thymocyte development.

123

#### 124 **The ERAD machinery is required for $\alpha\beta$ T cell development**

125 To resolve the ER proteostasis machinery required for the development of thymocytes, we  
126 conditionally deleted individual genes encoding key mediators of the UPR (*Xbp1*, *Perk*) and  
127 ERAD (*Sel1l*) using the *CD2*-Cre transgene (Siegemund et al., 2015). In this model, significant  
128 Cre activity initiated in ETP thymocytes (Shi and Petrie, 2012; Siegемund et al., 2015), and was  
129 efficient in depleting genes in subsequent stages of thymocyte development and mature T cells  
130 (**Figure 2 - figure supplement 1A, B**). Deletion of the UPR mediator *Xbp1* or *Perk* had no  
131 effect on T cell development as thymic cellularity, numbers of DN, DP, single positive (SP)  
132 thymocytes and splenic T cell numbers were comparable in gene-deficient and littermate control  
133 animals (**Figure 2 - figure supplement 1C-J**). Similarly, *Vav*-Cre-mediated deletion of *Atf6a*  
134 which initiates in bone marrow hematopoietic cell progenitors (Joseph et al., 2013) did not  
135 perturb thymocyte development (**Figure 2 - figure supplement 1K-N**).

136 Strikingly, *CD2*-Cre-mediated deletion of the ERAD core component *Sel1l* (*Sel1l*<sup>CD2</sup>  
137 mice) resulted in a markedly decreased thymus size and cellularity, with significantly reduced

138 and dispersed medullary regions compared to control littermates (*Sell1<sup>fllox/fllox</sup>*; Ctrl) (**Figure 2A-**  
139 **D**). The reduced thymus cellularity was accompanied by a profound reduction of peripheral T  
140 cells in the spleen and lymph nodes from *Sell1<sup>CD2</sup>* mice compared to control animal (**Figure 2 -**  
141 **figure supplement 1O-R**). *Sell1* deletion had no impact on  $\gamma\delta$  T cells (**Figure 2 - figure**  
142 **supplement 1S**), indicating that within the T-cell lineage, SEL1L is selectively required for  $\alpha\beta$  T  
143 cell development.

144

#### 145 **SEL1L is required for DN to DP thymocyte transition following $\beta$ selection**

146 While *Sell1<sup>CD2</sup>* mice had similar numbers of DN thymocytes (**Figure 2E** and **Figure 2 - figure**  
147 **supplement 2A**), they showed significantly reduced numbers of DP and mature SP thymocytes  
148 compared to littermate controls (**Figure 2F**). This finding suggests that SEL1L functioned during  
149 the DN to DP thymocyte transition. To clarify this possibility, we generated and analyzed  
150 thymocyte developmental stages in *Sell1<sup>fllox/fllox</sup>; CD4-Cre (*Sell1<sup>CD4</sup>)* mice. Unlike *CD2-Cre* which  
151 initiated in ETP (Siegemund et al., 2015), *CD4-Cre* initiated in immature single-positive (ISP,  
152  $CD8^+CD24^+TCR\beta^-$ ) thymocytes (Gegonne et al., 2018; Kadakia et al., 2019; Xu et al., 2016) and  
153 only significantly depleted *Sell1* in ISPs and later stage thymocytes (**Figure 2 - figure**  
154 **supplement 2B, C**). *Sell1<sup>CD4</sup>* mice exhibited indistinguishable thymic cellularity, immature DN,  
155 DP and SP thymocytes numbers from control mice (**Figure 2 - figure supplement 2D-G**). Thus,  
156 whereas SEL1L is dispensable for differentiation of post-DN4 thymocytes (i.e., DP, SP and  
157 mature T cells), its expression is critical for DN to DP thymocyte differentiation.*

158 To delineate the DN thymocyte developmental stage at which SEL1L is required, we  
159 generated 1:1 mixed bone marrow (BM) chimeras by transplanting equal numbers of whole BM  
160 cells from control (*Sell1<sup>fllox/fllox</sup>*,  $CD45.2^+$ ) or *Sell1<sup>CD2</sup>* ( $CD45.2^+$ ) mice along with congenic

161 (CD45.1<sup>+</sup>) wild-type (WT) competitor BM cells into irradiated CD45.1<sup>+</sup> recipient mice (**Figure**  
162 **2G**). Fourteen weeks after transplantation, control and *Selll*<sup>CD2</sup> donors equally reconstituted  
163 similar numbers of all BM hematopoietic progenitors including Lineage<sup>-</sup>Sca-1<sup>+</sup>c-Kit<sup>+</sup> (LSK)  
164 cells, hematopoietic stem progenitor cells (HPC), multipotent progenitor (MPP) and myeloid  
165 progenitors (Lineage<sup>-</sup>Sca-1<sup>+</sup>c-Kit<sup>+</sup> (LS-K) cells (**Figure 2 - figure supplement 2H**). We found  
166 substantial defective thymus reconstitution starting from the DN4 stage from *Selll*-KO donors  
167 (**Figure 2H, I**). *Selll*<sup>CD2</sup> donor derived DN3 to DN4 ratio was significantly increased compared  
168 to controls (**Figure 2 - figure supplement 2I**), suggesting that *Selll* depletion compromised the  
169 fitness of DN3 thymocytes in which  $\beta$ -selection occurs and impaired their transition to the DN4  
170 stage. The impaired DN thymus reconstitution from *Selll*<sup>CD2</sup> donors was accompanied by severe  
171 defects in subsequent donor-derived DP and SP thymocytes (**Figure 2H, I**), as well as peripheral  
172 T cells in the spleen (**Figure 2 - figure supplement 2J**). These data demonstrate a cell-intrinsic  
173 requirement of *Selll* for DN3 thymocyte progression to later stages of thymocyte differentiation.

174 To further clarify the requirement for SEL1L in DN3-to-DN4 thymocyte transition  
175 during  $\beta$ -selection, we used the *in vitro* T cell differentiation system of culturing immature  
176 thymocytes on monolayers of OP9 stromal cells expressing the Notch ligand Delta-like 1 (OP9-  
177 DL1 cells) supplemented with IL-7 and Flt3 ligand (Balciunaite et al., 2005; Holmes and Zúñiga-  
178 Pflücker, 2009; Schmitt et al., 2004) (**Figure 2J**). We cultured DN2 thymocytes from control  
179 or *Selll*<sup>CD2</sup> mice on OP9-DL1 cells and found that SEL1L-deficiency markedly abrogated DN4  
180 thymocyte generation (**Figure 2K-M**). On day 17 of co-culture, only 31.3% DN3 cells remained  
181 in WT-derived cells, while more than three-fold DN3 cells (71.6%) were found in *Selll*-KO  
182 derived cells (**Figure 2K-M**), consistent with a block in DN3 to DN4 thymocyte transition. Since  
183 only DN3 thymocytes that have successfully undergone  $\beta$ -selection differentiate to the DN4 and



184 DP thymocyte stage these results reinforce that cell-intrinsic SEL1L activity is required for post  
185  $\beta$ -selection DN thymocyte development.

186

### 187 **SEL1L is required for thymocyte survival at the $\beta$ -selection checkpoint**

188 Next, we assessed the impact of *Sell1* deletion on DN thymocyte proliferation and survival, two  
189 key outcomes of successful  $\beta$ -selection (Ciofani and Zúñiga-Pflücker, 2005; Kreslavsky et al.,  
190 2012). Whereas BrdU incorporation was similar in control and *Sell1*<sup>CD2</sup> DN3 thymocytes, we  
191 observed more BrdU incorporation in *Sell1*<sup>CD2</sup> DN4 thymocytes than control DN4 thymocytes  
192 (**Figure 3A**). In agreement, co-staining for Ki-67 and the DNA dye (DAPI) revealed less  
193 *Sell1*<sup>CD2</sup> DN4 thymocytes in G0 phase, and more in G1 and S/G2/M phase (**Figure 3B, C**).  
194 *Sell1*<sup>CD2</sup> DN3 cells showed similar cell cycle kinetics as control DN3 thymocytes, in line with  
195 their normal levels of BrdU incorporation (**Figure 2 - figure supplement 2K, L**). The higher  
196 proliferation of endogenous *Sell1*-deficient DN4 thymocytes may be a compensation for their  
197 compromised fitness. This likely explains the paradoxical observation that *Sell1*<sup>CD2</sup> donors  
198 generated markedly reduced DN4 thymocytes in BM chimeras (**Figure 2H, I**), yet *Sell1*<sup>CD2</sup> mice  
199 had comparable DN4 thymocytes as control mice in steady state (**Figure 2E**).

200 That, despite their higher proliferative status, *Sell1*<sup>CD2</sup> DN4 thymocytes failed to progress  
201 to DP thymocytes and generate mature T-cells prompted us to ask if *Sell1* deficiency resulted in  
202 apoptosis of  $\beta$ -selected thymocytes. To test this possibility, we cultured equal number of DN3  
203 thymocytes from control or *Sell1*<sup>CD2</sup> mice on OP9-DL1 stromal cells and assessed their apoptosis  
204 *in vitro*. Indeed, *Sell1*<sup>CD2</sup> DN3 thymocytes showed higher apoptosis measured by proportions of  
205 Annexin-V positive cells (**Figure 3D**). To confirm that *Sell1*-deficiency resulted in DN  
206 thymocyte apoptosis *in vivo*, we histologically enumerated apoptosis in thymic sections by

207 measuring active Caspase-3 which degrades multiple cellular proteins and is responsible for  
208 morphological changes and DNA fragmentation in cells during apoptosis (Bai et al., 2013).  
209 Compared to controls, *Sell1*<sup>CD2</sup> thymus showed more active Caspase-3 apoptotic cells in the  
210 cortex area (**Figure 3E, F**), which is typically populated by DN thymocytes (Tramont et al.,  
211 2010). This observation was further confirmed using TUNEL (terminal deoxynucleotidyl  
212 transferase dUTP nick end labeling) staining (**Figure 3G, H**). Taken together, we concluded that  
213 *Sell1*-deficient  $\beta$ -selected DN3 cells were undergoing apoptosis as they differentiated into DN4  
214 thymocytes.

215

#### 216 **Notch directly regulates transcription of ERAD genes**

217 Having established that the SEL1L-ERAD, but not the UPR, is a crucial proteostasis machinery  
218 required for  $\beta$ -selection, we next sought to understand the thymic signals which regulate SEL1L  
219 expression in DN thymocytes. Because high *Sell1* expression (**Figure 1D**) coincided with high  
220 levels of Notch1 in DN2 and DN3 thymocytes (**Figure 4A**), we explored the possibility that  
221 Notch ligands might activate the ERAD machinery to enable DN thymocytes to maintain  
222 proteostasis during  $\beta$ -selection. Stimulation of the thymoma cell line EL4 with Notch ligand  
223 Delta-like 4 (DLL4) induced expression of the genes involved in ERAD including *Sell1*, *Hrd1*,  
224 *Os9* and *Edem1* as well as SEL1L proteins (**Figure 4B, C**). Induction of these genes by DLL4  
225 was concomitant with the induction of classical Notch targets like *Hes1*, *Deltex1*, and *Ptcra* (pre-  
226 T $\alpha$ ) (**Figure 4 - figure supplement 1A**).

227 To further determine whether Notch regulates expression of ERAD component genes, we  
228 treated freshly isolated primary DN3 thymocytes with the highly specific  $\gamma$ -secretase inhibitor  
229 DAPT (N-[N-(3,5-difluorophenacetyl)-L-alanyl]-S-phenylglycine t-butyl ester) that blocks

230 ligand-induced cleavage of the Notch intracellular domain (NICD), preventing its nuclear  
231 translocation and subsequent transactivation of the RBP-J transcription factor at target genes  
232 (Chen et al., 2019; Obaldia et al., 2013; Schmitt et al., 2004) (Bray, 2016). Indeed, treatment  
233 with DAPT significantly reduced expression of Notch target genes *Hes1*, *Deltex1*, and *Ptcra*  
234 (**Figure 4 - figure supplement 1B**) and also reduced *Sell1*, *Hrd1*, *Os9* and *Edem1* expression in  
235 DN3 thymocytes (**Figure 4D**). These data demonstrate that Notch signals regulate expression of  
236 genes constituting the ERAD machinery.

237         Analysis of the promoters of the core ERAD genes, *Sell1* and *Hrd1*, revealed conserved  
238 binding sites for RBP-J (**Figure 4E**), the DNA binding partner and master transcription factor of  
239 the NICD transactivation complex (Castel et al., 2013; Tanigaki and Honjo, 2007). To  
240 interrogate how Notch regulates the ERAD gene components, we performed chromatin  
241 immunoprecipitation and qPCR of target DNA (ChIP-qPCR) experiments in EL4 cells. DLL4  
242 stimulation of Notch signaling significantly induced NICD and RBP-J bindings at the promoters  
243 of *Sell1*, *Hrd1*, *Os9* and *Edem* (**Fig. F-I**).

244         We cloned the *Sell1* and *Hrd1* promoters containing the RBP-J binding sites into the  
245 pGL3 firefly luciferase reporter and tested the regulation of these promoters by Notch. When co-  
246 transfected with promoter luciferase reporters into HEK293T cells, NICD potently induced both  
247 *Sell1* and *Hrd1* promoter activity in a dose-dependent manner (**Figure 4J**). In agreement, DLL4  
248 stimulation of Notch signaling in EL4 cells also substantially activated *Sell1* and *Hrd1* promoter  
249 activity (**Figure 4K, L**). Importantly, mutation of the RBP-J binding sites abolished DLL4-  
250 driven induction of *Sell1* or *Hrd1* luciferase reporter activity (**Figure 4K, L**). These data indicate  
251 that Notch signaling directly regulates expression of SEL1L ERAD machinery. Interestingly,  
252 although ERAD is known to regulate surface receptor expression in a substrate-specific manner

253 (Boomen and Lehner, 2015; Xu et al., 2020), *Sell1* deletion did not affect surface Notch1 protein  
254 levels in DN thymocyte populations (**Figure 4 - figure supplement 1C**). These results not only  
255 suggest that ERAD does not regulate Notch signaling *per se* but also imply that thymocyte  $\beta$ -  
256 selection defects in *Sell1*<sup>CD2</sup> mice were not due to failure in Notch signal transduction.

257

### 258 **SEL1L is not required for pre-TCR signaling**

259 The *Tcrb* allele is rearranged in DN2/DN3 thymocytes and the resulting TCR $\beta$  protein pairs with  
260 pre-T $\alpha$  and CD3 complex proteins to form the pre-TCR which, together with Notch, transduce  $\beta$ -  
261 selection signals which promote survival, proliferation and further differentiation of DN3  
262 thymocytes (Ciofani et al., 2004; Michie and Zúñiga-Pflücker, 2002; Sambandam et al., 2005).  
263 DN3 thymocytes that fail to undergo productive recombination of the *Tcrb* locus fail  $\beta$ -selection,  
264 do not complete the DN4-DP transition and are eliminated by apoptosis (Ciofani et al., 2004).  
265 Therefore, to understand how SEL1L regulates  $\beta$ -selection thymocyte survival and the resulting  
266 DN-to-DP transition, we first asked whether *Sell1*-deficiency caused defective V(D)J  
267 recombination. Genomic DNA analysis of *Sell1*-deficient DN3 and DN4 thymocytes showed that  
268 recombination of *Vb5-Jb2*, *Vb8-Jb2* and *Vb11-Jb2* gene segments were not altered (**Figure 5 -**  
269 **figure supplement 1A**), indicating that *Sell1* deficiency does not affect *Tcrb* gene  
270 rearrangement.

271 Next, we asked whether SEL1L regulates the expression and signaling of the pre-TCR  
272 complex. Expression of intracellular TCR $\beta$  in pre-selected DN3a, post-selected DN3b and DN4  
273 cells was comparable between control and *Sell1*<sup>CD2</sup> mice (**Figure 5 - figure supplement 1B, C**).  
274 *Sell1* deletion also had no impact on the expression of pre-TCR signaling intermediates including  
275 LCK and ZAP-70 in DN3 and DN4 thymocytes (**Figure 5 - figure supplement 1D**).

276 To further evaluate whether the *Sell1*<sup>CD2</sup> mice phenotype was due to defective pre-TCR  
277 signaling, we introduced the MHCII-restricted TCR- $\beta$  transgene OT-II into *Sell1*<sup>CD2</sup> mice. As  
278 previously reported (Kim et al., 2014; Marquis et al., 2014), expression of TCR transgenes like  
279 OT-II in early DN thymocytes can rescue  $\beta$ -selection defects caused by defective pre-TCR  
280 expression or signaling. However, the OT-II TCR transgene did not rescue T cell development in  
281 OT-II.*Sell1*<sup>CD2</sup> mice which showed a >80% decrease in thymic cellularity, DP and SP  
282 thymocytes (**Figure 5 - figure supplement 1E-G**). In addition, OT-II TCR failed to rescue  
283 impaired DN3 to DN4 thymocyte transition resulting from *Sell1* deficiency as DN4 thymocytes  
284 were decreased ~60% in OT-II.*Sell1*<sup>CD2</sup> mice compared to littermate controls (**Figure 5 - figure**  
285 **supplement 1H**). Taken together, these data implied that  $\beta$ -selection defects in *Sell1*<sup>CD2</sup> mice  
286 were not due to defects in pre-TCR expression or signaling.

287

### 288 ***Sell1*-deficiency triggers unresolved ER stress during $\beta$ -selection**

289 To understand the molecular mechanism by which SEL1L ERAD regulates thymocyte survival  
290 and differentiation at  $\beta$ -selection, we performed RNA-seq on control and *Sell1*<sup>CD2</sup> DN3  
291 thymocytes. The most upregulated pathways in *Sell1*<sup>CD2</sup> DN3 thymocytes were ER stress  
292 response and the UPR, including both IRE1 $\alpha$  and PERK pathways (**Figure 5A, B**). Gene set  
293 enrichment analysis (GSEA) also revealed enriched ER stress response in *Sell1*<sup>CD2</sup> thymocytes  
294 (**Figure 5C-E**). These signatures hinted at elevated ER stress in *Sell1*<sup>CD2</sup> DN3 thymocytes.  
295 Consistent with elevated ER stress, flow cytometry quantification of ER tracker dye staining  
296 indicated significant ER expansion in *Sell1*<sup>CD2</sup> DN3 cells compared to control thymocytes  
297 (**Figure 5F, G**).

298 To further ascertain the induction of ER stress following *Sell1* deletion, we sorted DN3

299 and DN4 thymocytes from control or *Sell1<sup>CD2</sup>* mice and examined the activation of all three UPR  
300 branches. We found a significant increase in IRE1 $\alpha$  proteins and in the splicing of its substrate  
301 *Xbp1* in *Sell1<sup>CD2</sup>* thymocytes (**Figure 5H, I and Figure 5 - figure supplement 2A, B**). We also  
302 observed increased PERK and eIF2 $\alpha$  phosphorylation as well as increased ATF4 and BIP  
303 proteins in *Sell1<sup>CD2</sup>* DN3 thymocytes (**Figure 5H**). Various ER chaperones, including  
304 *Calreticulin*, *Grp94 (Hsp90b1)*, *Bip*, *HYOU1*, and *Canx*, were markedly upregulated in *Sell1<sup>CD2</sup>*  
305 DN3 and DN4 thymocytes (**Figure 5 - figure supplement 2C, D**). These data indicate that *Sell1*  
306 deletion triggers ER stress leading to activation of all three UPR branches in DN thymocytes.

307 As ERAD alleviates proteotoxic stress by promoting the degradation of misfolded or  
308 unfolded proteins we hypothesized that loss of SEL1L increased proteotoxic stress during  $\beta$ -  
309 selection. Indeed, we found that *Sell1<sup>CD2</sup>* DN3 thymocytes exhibited significantly higher staining  
310 for misfolded/unfolded proteins with TMI (**Figure 5J, K**). We also employed proteostat, a  
311 molecular rotor dye, to examine protein aggregation in DN3 thymocytes. The proteostat dye  
312 specifically intercalates into the cross-beta spine of quaternary protein structures typically found  
313 in misfolded and aggregated proteins, which inhibits the dye's rotation and leads to a strong  
314 fluorescence (**Figure 5L**). *Sell1<sup>CD2</sup>* DN3 thymocytes displayed more protein aggregates  
315 compared with control thymocytes (**Figure 5M, N**). Collectively, these results corroborate that  
316 DN thymocytes lacking SEL1L accumulate misfolded/unfolded proteins leading to proteotoxic  
317 stress that then triggered the UPR and eventually apoptosis.

318

### 319 **PERK signaling drives $\beta$ -selected thymocyte apoptosis in *Sell1<sup>CD2</sup>* mouse**

320 To determine whether upregulation of the UPR contributed to post- $\beta$ -selected thymocyte  
321 apoptosis and the *Sell1<sup>CD2</sup>* mouse phenotype, we generated *Sell1/Xbp1* double-knockout

322 (*Sell<sup>flox/flox</sup>.Xbp1<sup>flox/flox</sup>.CD2-cre*), and *Sell1/Perk* double-knockout (*Sell<sup>flox/flox</sup>.Perk<sup>flox/flox</sup>.CD2-*  
323 *cre*) mice. Deletion of *Xbp1* in *Sell1<sup>CD2</sup>* mice did not rescue thymocyte development (**Figure 6 -**  
324 **figure supplement 1A**). In fact, *Sell1/Xbp1* double-knockout (DKO) mice showed more severe  
325 thymocytes development defects including a more than 95% loss in thymus cellularity and DP  
326 thymocyte numbers (**Figure 6 - figure supplement 1A**). The DN3 and DN4 thymocytes from  
327 *Sell1/Xbp1* DKO exhibited much more *Chop* expression (**Figure 6 - figure supplement 1B**).  
328 These data suggest that induction of the IRE1 $\alpha$ /XBP1 pathway functions as a compensatory  
329 adaptative pathway to restrain *Sell1*-deficiency induced ER stress.

330 In contrast to deletion of *Xbp1*, we found that deletion of *Perk* significantly rescued the  
331 *Sell1<sup>CD2</sup>* mouse phenotype evident in the near complete restoration of thymus cellularity, DP and  
332 SP thymocyte cell numbers (**Figure 6A, B**). *Perk* deletion also restored peripheral T cells in  
333 spleen and lymph nodes compared to *Sell1<sup>CD2</sup>* mice (**Figure 6C-F**). Consistent with the rescue,  
334 *Perk* deletion significantly reduced *Sell1*-deficiency induced *Chop* induction (**Figure 6G**) and  
335 thymocyte apoptosis (**Figure 6H, I**) and restored normal cell cycle kinetics to *Sell1<sup>CD2</sup>* DN4  
336 thymocytes (**Figure 6 - figure supplement 1C**). As *Perk* deficiency alone had no effect on T  
337 cell development (**Figure 6A-I**), these results indicate that activated PERK signaling contributed  
338 to the apoptosis of DN3/DN4 thymocytes that impaired  $\beta$ -selection in *Sell1<sup>CD2</sup>* mice.

339 Collectively, we conclude that SEL1L-ERAD promotes  $\beta$ -selected DN thymocyte differentiation  
340 by maintaining ER proteostasis and suppressing ER stress-induced cell death through the PERK  
341 pathway.

342

## 343 **Discussion**

344 In this study, we have uncovered a novel “Notch-ERAD’ axis in thymocyte development. In the

345 absence of the core ERAD protein SEL1L, thymocytes failed to survive  $\beta$ -selection and T cell  
346 development was severely impaired. Our results imply that the protein synthesis and folding  
347 demands during  $\beta$ -selection require a robust proteome quality control monitoring which is  
348 accomplished by the ERAD in thymocytes transitioning from the DN3 to DN4 stage. Thus,  
349 induction of the SEL1L axis of ERAD, which peaks at the DN3 stage, represents a previously  
350 undefined and critical ER proteostasis checkpoint during  $\beta$ -selection. It is notable that this ER  
351 proteostasis checkpoint is also regulated by the same Notch signals which, together with the pre-  
352 TCR, induce  $\beta$ -selection in DN3 thymocytes. We identified that Notch1 and RBP-J directly bind  
353 to most ERAD gene promoters and directly regulate their expression.

354 ERAD and UPR are two key ER protein quality control machineries that are activated at  
355 different thresholds. ERAD is responsible for the clearance of misfolded proteins at steady-state  
356 and is constitutively activated regardless of ER stress. In contrast, the UPR is a stress response  
357 pathway that is triggered when the accumulation of misfolded and unfolded proteins exceed the  
358 ER folding capacity. Existing evidence suggest that UPR pathways like the IRE1 $\alpha$ -XBP1 axis  
359 appear to selectively regulate hematopoietic cell differentiation programs but individual UPR  
360 enzymes influence early thymopoiesis remain to be fully characterized. For instance, the IRE1 $\alpha$ -  
361 XBP1 is essential for eosinophil (Bettigole et al., 2015), dendritic cell (Cubillos-Ruiz et al.,  
362 2015; Iwakoshi et al., 2007; Osorio et al., 2014), NK (Dong et al., 2019; Wang et al., 2019) and  
363 plasma cell (Reimold et al., 2001; Shapiro-Shelef and Calame, 2005) differentiation. Unlike the  
364 marked defect in thymocyte development in the absence of SEL1L-ERAD, our current study  
365 now clearly demonstrates that individual UPR regulators are dispensable for  $\beta$ -selection and  
366 subsequent stages of thymocyte maturation. We specifically found that deletion of the individual  
367 UPR master regulators XBP1, ATF6, or PERK had no overt impact on  $\alpha\beta$  T or  $\gamma\delta$  T cell



368 development in the thymus and peripheral tissues. Nevertheless, our results don't exclude the  
369 possibility that redundancy might exist among the UPR pathways during thymocyte  
370 development.

371 *Sell1*-deficiency impaired the survival of DN thymocytes following  $\beta$  selection and  
372 resulted in the inability of DN3 thymocytes to expand and progress to DP thymocytes.  
373 Interestingly, this phenotype was not due to defective rearrangement of TCR $\beta$  nor defective  
374 Notch or pre-TCR signaling which both activate pro-survival genes in  $\beta$ -selected thymocytes  
375 (Ciofani and Zúñiga-Pflücker, 2005; Kreslavsky et al., 2012; Zhao et al., 2019). Instead, our  
376 genetic inactivation delineate a pro-apoptotic pathway driven by the PERK axis. While all three  
377 UPR pathways can promote apoptosis and appear to be upregulated in *Sell1*<sup>CD2</sup> thymocytes, it is  
378 notable that only PERK axis induces apoptosis in *Sell1*<sup>CD2</sup> thymocytes. On the contrary,  
379 induction of the IRE1 $\alpha$ -XBP1 axis of the UPR can help cells adapt to stress. Consistent with this  
380 view, deletion of *Xbp1* in *Sell1*<sup>CD2</sup> thymocytes exacerbated defects in thymocyte development  
381 unlike PERK inactivation which restored T cell development from *Sell1*<sup>CD2</sup> thymocytes.

382 Although  $\alpha\beta$  T and  $\gamma\delta$  T cells develop in the thymus from the same thymic seeding  
383 progenitors, the function of ERAD appears to be restricted to  $\alpha\beta$  T cells. While future studies are  
384 needed to determine the alternative protein quality control mechanism regulating  $\gamma\delta$  T cell  
385 development, our findings are consistent with the selective requirement for Notch in driving  $\beta$ -  
386 selection (Maillard et al., 2006), a key developmental checkpoint unique to the  $\alpha\beta$  T cell  
387 differentiation program. In addition, DN thymocytes undergoing  $\beta$  selection expand more than  
388 100-fold, a situation that likely explains their increased translational activity. That post- $\beta$ -  
389 selected DN thymocytes displayed markedly low levels of misfolded/unfolded proteins support  
390 the view that upregulation of the SEL1L-ERAD axis in DN3 thymocytes provides a mechanism

391 to alleviate deleterious proteotoxic stress that compromise the fitness of DN4 thymocytes. In this  
392 way, SEL1L-ERAD safeguards to DN3/DN4 thymocyte pool to ensure that the maximum  
393 number of DN thymocytes expressing a functional TCR $\beta$  protein progress to the DP stage to  
394 audition for positive selection.

395 In summary, our study reports a previously unknown function of Notch in maintaining  
396 proteostasis and protecting post- $\beta$ -selection thymocytes from ER stress by upregulating ERAD.  
397 We propose that in addition to driving energy metabolism and survival programs demanded by  
398 proliferating thymocytes following  $\beta$ -selection, Notch signals in parallel activate the ERAD  
399 machinery in DN3 thymocytes to clear misfolded proteins. Thus, stringent protein quality control  
400 through the SEL1L-ERAD pathway is required for successful  $\beta$ -selection and the development  
401 of the  $\alpha\beta$  T cells that mediate adaptive immunity.

402

403

404 **Acknowledgements.** We thank Dr. Juan Carlos Zúñiga-Pflücker (University of Toronto) for  
405 providing the OP9-DL1 cells and Dr. Laurie Glimcher (Dana Farber Cancer Institute) for  
406 providing the *Xbp1* flox mice. This work was supported by the National Institutes of Health  
407 (R01HL146642, R37CA228304 and P50CA186784 to X.C.; R01 AI1143992 and  
408 K22CA 218467 to S.A.; R35GM130292 to L.Q.), the US Department of Defense  
409 Congressionally Directed Medical Research Programs (W81XWH1910524 to X. C.;  
410 W81XWH1910306 to S.A.; W81XWH1910035 to X. L.), and Cancer Prevention and Research  
411 Institute of Texas (RP160283 Baylor College of Medicine Comprehensive Cancer Training  
412 Program award to F.P.). This work was supported by the Cytometry and Cell Sorting Core at the  
413 Baylor College of Medicine with funding from the CPRIT Core Facility Support Award (CPRIT-

414 RP180672), the NIH (CA125123, S10OD025251 and RR024574) and the assistance of J. M.  
415 Sederstrom. Imaging for this work was supported by the Integrated Microscopy Core at Baylor  
416 College of Medicine and the Center for Advanced Microscopy and Image Informatics (CAMII)  
417 with funding from NIH (DK56338, CA125123, ES030285), and CPRIT (RP150578, RP170719),  
418 the Dan L. Duncan Comprehensive Cancer Center, and the John S. Dunn Gulf Coast Consortium  
419 for Chemical Genomics.

420

421 **Author Contributions.** X.C. and S.A. conceived the project. X. L., J. Y., L.X., K.U.W., S.A.,  
422 and X.C. designed the research; X. L., J.Y., L.X., K.U.W., F. P., Y.D., B.M.B., X. L. and M.Y.Z.  
423 did the experiments and analyzed the data; S. S., Y.H., and L.Q. contributed to discussions,  
424 experimental design and critical reagents; X.C. and S.A. supervised the project; S.A., X.C. and  
425 J.Y. wrote the paper.

426

427 **Competing interests.** The authors have declared that no conflict of interest exists.

428

429 **Materials & Correspondence.** Correspondence and material requests should be addressed to  
430 Stanley Adoro, Ph.D., Department of Pathology, Case Western Reserve University, Cleveland,  
431 OH, USA; Phone 216-368-4712; FAX 216-368-0494; Email: [sxa726@case.edu](mailto:sxa726@case.edu), or Xi Chen,  
432 Ph.D., Department of Molecular and Cellular Biology, Baylor College of Medicine, One Baylor  
433 Plaza, MS: BCM130, Debakey Building, BCMM-M626, Houston, TX 77030, USA; Phone 713-  
434 798-4398; FAX 713-790-1275; Email: [Xi.Chen@bcm.edu](mailto:Xi.Chen@bcm.edu)

435

436

## 437 **Materials and Method**

### 438 **Mice**

439 The mice were maintained in a pure C57BL/6 background and kept under specific-pathogen-free  
440 conditions in the transgenic mouse facility of the Baylor College of Medicine (22–24 °C, 30–  
441 70% humidity with a 12-h dark and 12-h light cycle). *Sell1<sup>flox/flox</sup>* and *Xbp1<sup>flox/flox</sup>* were described  
442 previously (Xu et al., 2020), *Perk1<sup>flox/flox</sup>* mice were purchased from Jackson Laboratory (Stock  
443 No. 023066). The floxed mice were crossed with either *hCD2-iCre* (The Jackson Laboratory,  
444 008520) or *CD4-Cre* (The Jackson Laboratory, 022071) mice to generate *Sell1<sup>flox/flox</sup>; hCD2-*  
445 *iCre*, *Sell1<sup>flox/flox</sup>; CD4-Cre*, *Xbp1<sup>flox/flox</sup>; hCD2-iCre*, or *Perk1<sup>flox/flox</sup>; hCD2-iCre* mice.  
446 The *Sell1<sup>flox/flox</sup>; Xbp1<sup>flox/flox</sup>; hCD2-iCre* mice and *Sell1<sup>flox/flox</sup>; Perk1<sup>flox/flox</sup>; hCD2-iCre* mice were  
447 generated by crossing *Sell1<sup>flox/flox</sup>; hCD2-iCre* mice with *Xbp1<sup>flox/flox</sup>* or *Perk1<sup>flox/flox</sup>* mice  
448 respectively. *Atf6<sup>Vav</sup>-iCre KO* mice were generated by crossing *Atf6<sup>flox/flox</sup>* (The Jackson  
449 Laboratory, 028253) with *Vav-iCre* mice (The Jackson Laboratory, 008610). *Sell1<sup>CD2</sup>*; OTII  
450 transgenic mice were generated by crossing *Sell1<sup>CD2</sup>* mice with OTII transgenic mice (The  
451 Jackson Laboratory, 004194).

452 Six to Eight-week-old gender-matched mice were used for phenotype analysis and *in*  
453 *vitro* assay. For the bone marrow transplantation assays, female C57BL/6-Ly5.1 (CD45.1<sup>+</sup>) mice  
454 (Charles River, 564) were used at 8–12 weeks of age. All procedures were approved by the  
455 Baylor College of Medicine Institutional Animal Care and Use Committee or Case Western  
456 Reserve University Institutional Animal Care and Use Committee. The study is compliant with  
457 all of the relevant ethical regulations regarding animal research.

458

459

## 460 ***In Vivo* Assays**

461 For the competitive bone marrow transplantation experiments, CD45.1<sup>+</sup> recipient mice were  
462 lethally irradiated (10 Gy, delivered with two equal doses 4 h apart) and injected retro-orbitally  
463 with 1x10<sup>6</sup> whole bone marrow cells from *Sell*<sup>fl<sup>ox</sup>/fl<sup>ox</sup></sup> or *Sell*<sup>fl<sup>ox</sup>/fl<sup>ox</sup></sup>; *hCD2-iCre* mice with an  
464 equal number of CD45.1<sup>+</sup> competitor BM cells. For the BrdU incorporation assay, the mice were  
465 injected intraperitoneally with single dose of BrdU (BD, 559619; 50 mg/kg body weight) 2 h  
466 before euthanization.

467

## 468 **Flow Cytometry and Cell Sorting**

469 Single-cell suspensions from thymus, spleen and lymph nodes were obtained by passing the  
470 tissues through a 70- $\mu$ m strainer. Bone marrow was removed from femurs and tibiae by flushing  
471 with PBS, 2% FBS. For bone marrow and spleen cell suspensions, red blood cells were removed  
472 by incubating with RBC Lysis Buffer (Biolegend, 420301). 1  $\times$  10<sup>6</sup> to 2  $\times$  10<sup>6</sup> cells were stained  
473 with antibodies at 4°C for 30 min in phosphate-buffered saline (PBS) containing 1% bovine  
474 serum albumin (BSA), followed by washing to remove the unbound antibodies.

475 Antibodies used for flow cytometry: The biotin-conjugated lineage markers for excluding  
476 non-DN cells are purchased from BioLegend: CD11b (M1/70, 101204), CD11c (N418,  
477 117303), Ter119 (Ter119, 116204), Gr-1 (RB6-8C5, 108404), CD49b (DX5, 108904), and B220  
478 (RA3-6B2, 103204). CD4 (BV650, RM4-5, 100546, BioLegend), CD8 (AF700, 53-6.7, 100730,  
479 BioLegend), CD25 (PE-Cy7, 3C7, 101915, BioLegend), CD44 (PE594, IM7, 103056,  
480 BioLegend), c-Kit (APC-Cy7, 2B8, 105838, Biolegend),  $\gamma\delta$ TCR (PE, GL3, 118108, Biolegend)  
481 and CD27 (APC, LG.3A10, 124211, BioLegend) antibodies were used for analysis of ETP to SP  
482 cells in the thymus. CD4 (BV650, RM4-5, 100546, BioLegend), CD8 (AF700, 53-6.7, 100730,

483 BioLegend),  $\gamma\delta$ TCR (APC, GL3, 118115, BioLegend), B220 (PB, RA3-6B2, 103230,  
484 BioLegend), and NK1.1 (FITC, PK136, 108706, BioLegend) antibodies were used for the  
485 analysis of mature cells in the spleen and lymph nodes. Anti-CD45.1 (FITC, A20, 110706,  
486 BioLegend) and CD45.2 (APC, 104, 109814, BioLegend) antibodies were used for the analyses  
487 of donor chimerism in the bone marrow transplantation assay. All antibodies used in this study  
488 are listed in **Supplementary Table 1**. Dead cells were excluded by 4,6-diamidino-2-  
489 phenylindole (DAPI) staining.

490 For cell sorting, DN thymocytes were purified by negative selection using a magnetic  
491 bead/column system (CD4 (L3T4) MicroBeads, 130-117-043; CD8a (Ly-2) MicroBeads, 130-  
492 117-044; LD Columns, 130-042-901; all purchased from Miltenyi Biotec) in accordance to the  
493 manufacturer's instructions. The pre-enriched DN cells were further stained as described above  
494 to sort DN2, DN3 or DN4 cells. Dead cells were excluded by DAPI staining.

495 Flow cytometry data were collected using BD FACS Diva 8 on a BD LSR II or BD  
496 Fortessa analyzer. The cell-sorting experiments were performed on a FACS Aria II cell sorter  
497 (BD). The acquired data were analyzed using the FlowJo 10 software.

498

#### 499 **Apoptosis assay**

500 For Annexin V staining, thymocytes were first stained with surface makers and then stained with  
501 Annexin V antibody for 30 min at room temperature in Annexin V binding buffer (TONBO,  
502 TNB-5000-L050). The cells were resuspended in Annexin V binding buffer with 1 $\mu$ g/ml DAPI  
503 for analysis.

504

505

## 506 **Cell Proliferation Assay**

507 For cell cycle analysis, thymocytes were stained with surface markers followed by fixation and  
508 permeabilization with eBioscience Transcription Factor Staining Buffer Set (Life Technologies,  
509 00-5523-00). The cells were then stained with anti-Ki-67 (FITC, 16A8, 652409, Biolegend) and  
510 DAPI for cell cycle analysis. For BrdU staining, total thymocytes were stained with surface  
511 markers to define each subset, followed by intracellular staining using the BrdU staining kit  
512 according to the manufacturer's instructions (BD Biosciences, 559619).

513

## 514 **Cell culture**

515 OP9 bone marrow stromal cells expressing the Notch ligand DL-1 (OP9-DL1) were kindly  
516 provided by Dr. Juan Carlos Zúñiga-Pflücker (University of Toronto). The OP9-DL1 cells were  
517 cultured and maintained in  $\alpha$ MEM medium, supplemented with 10% FBS (Gibco), penicillin  
518 (100  $\mu$ g/mL) and streptomycin (100 U/mL) (Invitrogen). For thymocytes co-cultures, the sorted  
519 DN2 or DN3 cells were plated onto confluent OP9-DL1 monolayers (70–80% confluent) with  
520 addition of 5 ng/ml recombinant murine interleukin-7 (PeproTech) and 5 ng/ml Flt3L  
521 (PeproTech). Cells were harvested at different time points, filtered through 40 $\mu$ m cell strainer,  
522 and stained with antibodies including anti-CD45 V450 (Tonbo, 75-0451-U100), anti-CD4 BV650  
523 (Biolegend, 100546), anti-CD8a AF700 (Biolegend, 100730), anti-CD44 FITC (Biolegend,  
524 103006), or anti-CD25 APC (Biolegend, 101910), followed by staining with Annexin V PE  
525 (Biolegend, 640908) and DAPI (4,6-diamidino-2-phenylindole, Invitrogen, D1306). EL4 cells  
526 (ATCC-TIB39) were cultured in DMEM with 10% FBS (Gibco), penicillin (100  $\mu$ g/mL) and  
527 streptomycin (100 U/mL) (Invitrogen).

528

## 529 **Immunohistochemical Staining**

530 Thymus was fixed in fresh 4% paraformaldehyde for 24 hours and stored in 70% ethanol until  
531 paraffin embedding. Hematoxylin and eosin staining were performed on 5  $\mu\text{m}$ -thick paraffin  
532 sections. For cleaved caspase-3 IHC, the anti-cleaved caspase-3 antibody (1:50, Cell Signaling  
533 Technology #9661) was used. Slides were incubated with Envision Labelled Polymer-HRP  
534 Anti-Rabbit (Dako, K4002) for 30 minutes. Sections were developed with DAB+ solution  
535 (Dako, K3468) and counterstained with Harris Hematoxylin. Imaging analysis was performed  
536 with ImageJ (FIJI) to automatically count the labeled cells in each region, the data were shown  
537 as number of positive cells per region.

538

## 539 **RNA extraction and Quantitative real-time PCR**

540 Thymocytes were sorted directly into TRIzol LS reagent (Invitrogen, 10296010). Total RNA was  
541 extracted according to the manufacturer's instructions. Total RNA was reverse-transcribed using  
542 High-Capacity cDNA Reverse Transcription Kit (Thermo Fisher Scientific, 4368813).  
543 Quantitative real-time PCR was performed using PowerUp™ SYBR™ Green Master Mix  
544 (Thermo Fisher Scientific, A25778) on QuantStudio 6 real-time PCR system (Applied  
545 Biosystems). The primer sequences are listed in **Supplementary Table 2**.

546

## 547 **Western blot analysis.**

548 Western blot was performed as described previously (Xu et al., 2020). Approximately  $5 \times$   
549  $10^5$  DN3 cells were sorted directly into 250  $\mu\text{l}$  PBS containing 20% trichloroacetic acid (TCA).  
550 The concentration of TCA was adjusted to 10% after sorting and cells were incubated on ice  
551 for 30 min before centrifugation at 13,000 rpm for 10 min at 4 °C. Precipitates were washed



552 twice with pure acetone (Fisher scientific, A18-4) and solubilized in 9 M urea, 2% Triton X-  
553 100, and 1% dithiothreitol (DTT) in 1 x LDS sample buffer (Invitrogen, NP0007). Samples  
554 were separated on NuPAGE 4–12% Bis-Tris protein gels (Invitrogen, NP0336BOX) and  
555 transferred to PVDF membrane (Millipore). The blots were incubated with primary antibodies  
556 overnight at 4 °C and then with secondary antibodies. Blots were developed with the  
557 SuperSignal West Femto chemiluminescence kit (Thermo Scientific, 34096). Antibodies and  
558 reagents used are in **Supplementary Table 1 and 3**. The original western blot images are in  
559 source data files.

560

### 561 **RNA-seq and analysis**

562 DN3 thymocytes were directly sorted into TRIzol LS (ThermoFisher, cat. 10296028) and RNA  
563 was extracted following the standard protocol. The cDNA libraries were prepared using Truseq  
564 Stranded mRNA Kit (Illumina, California, USA # 20020594). Sequencing was performed on  
565 Illumina HiSeq 2000 (Illumina, California, USA), 150 bp paired end. Quality control was  
566 performed using FastQC. Raw reads were aligned to mouse genome GRC38 using STAR  
567 (2.5.2b) and counts for each protein-coding gene were obtained with HTSeq (2.7). DESeq2  
568 package (1.26.0) in R (3.6.1) was used to perform analysis of differential gene expression.  
569 Upregulated genes (with adjusted p value < 0.05, log2 fold change > 0.59) were selected for  
570 Gene Ontology (GO) analysis using Enrichr (<https://maayanlab.cloud/Enrichr/>). We further  
571 performed Gene Set Enrichment Analysis (GSEA) using fgsea package (1.11.2) with padj-  
572 preranked gene lists and mouse gene set collection from Bader Lab. Heatmaps were generated  
573 with pheatmap (1.0.12).

574

575 **Chromatin Immunoprecipitation (ChIP) assay**

576 EL4 cells were treated with PBS or 5 µg/ml recombinant mouse DLL4 (BioLegend, #776706)  
577 for 24 hours before crosslinked with 1% formaldehyde for 10 minutes at room temperature.  
578 Reaction was quenched with 125 mM glycine. ChIP was performed as previously described  
579 (Zhao et al., 2018) with NOTCH1 antibody (Abcam, ab27526), RBPJ antibody (Cell Signaling  
580 Technology, #5313), or normal rabbit IgG (Cell Signaling Technology, #2729). The sequences  
581 of all ChIP primers are listed in **Supplemental Table 2**.

582

583 **Luciferase assay**

584 The firefly luciferase reporter for *Sell1* or *Hrd1* (*Syvn1*) promoter was constructed by cloning the  
585 genomic region into the *MluI* and *XhoI* sites or the *MluI* and *HindIII* sites in the pGL-3 basic  
586 vector (Promega), respectively. Mutations were made by overlap extension polymerase chain  
587 reaction as previously described (Bryksin and Matsumura, 2010). All constructs were verified by  
588 DNA sequencing. The sequences of all primers are listed in **Supplemental Table 2**. 293T cells  
589 were transfected with *Sell1* or *Hrd1* promoter constructs, pRL-PGK (Promega) and 3xFlag-  
590 NICD1 (Addgene, #20183) or empty using Lipofectamine 3000 (Invitrogen, L3000015). Cell  
591 lysates were collected 48 hours after transfection, and luciferase activities were analyzed using  
592 the dual-luciferase reporter assay system (E1910, Promega). pRL-PGK, which expresses Renilla  
593 luciferase, was used as the internal control for adjustment of discrepancies in transfection and  
594 harvest efficiencies. EL4 cells were transfected with *Sell1* or *Hrd1* promoter constructs and pRL-  
595 PGK (Promega) using Lipofectamine 3000 (Invitrogen, L3000015). Cells were incubated with  
596 PBS or 5 µg/ml recombinant mouse DLL4 (BioLegend, #776706) for 24 hours before analysis.  
597

598 **V(D)J recombination assay**

599  $5 \times 10^5$  DN3 thymocytes were sorted from control (Ctrl, *Sell<sup>fllox/flox</sup>*) or *Sell<sup>CD2</sup>* (*Sell<sup>fllox/flox</sup>*;  
600 *hCD2-iCre*) thymus and subjected to genomic DNA isolation using PureLink® Genomic DNA  
601 Mini Kit (K1820-02) according to the manufacturer's instructions. The amplification of eF-1  
602 fragment was used as input control. The primers used for V $\beta$ 5-J $\beta$ 2, V $\beta$ 8- J $\beta$ 2, V $\beta$ 11-J $\beta$ 2, and eF1  
603 are listed in **Supplementary Table 2**. PCR products were resolved by 2% agarose gel  
604 electrophoresis.

605

606 **ER tracker staining**

607 Sorted DN3 thymocytes were washed with PBS, incubated with 1 $\mu$ M ER-Tracker Green  
608 (Thermo Fisher, E34251) in PBS for 15 min at 37 °C. The cells were then washed and  
609 resuspended in PBS, and analyzed by flow cytometry.

610

611 **Tetraphenylethene maleimide (TMI) staining**

612  $5 \times 10^6$  thymocytes were stained for cell surface markers as described above. After surface  
613 markers staining, cells were washed twice with PBS. Tetraphenylethene maleimide (TMI; 2 mM  
614 in DMSO) was diluted in PBS to reach 50  $\mu$ M final concentration and stained samples for 30  
615 minutes at 37 °C. Samples were washed once with PBS and analyzed by flow cytometry.

616

617 ***In vivo* measurement of protein synthesis**

618 O-propargyl-puromycin (OPP; MedChem Source LLP) stock dissolved in 10% DMSO/PBS was  
619 diluted in PBS for intraperitoneal injection at 50mg/kg. Mice were weighed, individually injected  
620 with OPP or vehicle, and euthanized one hour after injection. Thymuses were immediately

621 harvested. Thymocytes were isolated and stained for surface antigens and viability dyes, which  
622 was followed by fixation and permeabilization according to the Click-iT Plus OPP Alexa Fluor  
623 647 Protein Synthesis Assay Kit (ThermoFisher Scientific). Briefly, after incubation cells were  
624 subsequently fixed in 4% paraformaldehyde, permeabilized with 0.5% Triton-X100, then  
625 incubated with the AF647 reaction cocktail. Samples were acquired using a BD LSRFortessa and  
626 analyzed using FlowJo (Becton Dickinson) as per flow cytometry methods.

627

### 628 **Protein aggregation detection assay**

629 The PROTEOSTAT Aggresome Detection kit (Enzo Life Sciences, ENZ-51035-0025) was used  
630 to detect protein aggregates in freshly sorted DN3 thymocytes according to the manufacturer's  
631 instructions. DN3 thymocytes were fixed, permeabilized and incubated with PROTEOSTAT dye  
632 (1:10,000 dilution) for 30 min at room temperature. Nuclei were counterstained with DAPI.  
633 Samples stained with DAPI only were used as negative controls. Images (16-bit greyscale TIFFs)  
634 were analyzed using CellProfiler v2.2. In brief, the DAPI channel images were first smoother  
635 with a median filter and nuclei identified with automatic thresholding and a fixed diameter.  
636 Nuclei touching the border of the image are eliminated. Touching nuclei are separated with a  
637 watershed algorithm. Then, cell boundaries were identified by watershed gradient based on the  
638 dye signal, using nuclei as a seed. Metrics were extracted from the cell, cytoplasm and nuclear  
639 compartments.

640

### 641 **TUNEL staining**

642 TUNEL staining was performed on paraffin-embedded tissue sections using the In Situ Cell  
643 Death Detection Kit (catalog 11684795910, Roche) following the manufacturer's instructions.

644 Sections were counterstained with DAPI, and images were captured under fluorescence  
645 microscope. Tissue sections incubated with TUNEL reaction buffer without dTdT enzyme served  
646 as negative controls. Tissue sections treated with DNase I served as positive controls. The  
647 quantification of TUNEL<sup>+</sup> cells was performed with ImageJ (FIJI) to automatically count the  
648 labeled cells in each region. The data were presented as number of positive cells per region.

649

### 650 **Statistics and reproducibility**

651 Data are expressed as the mean  $\pm$  s.d. or mean  $\pm$  s.e.m. as indicated in the figure legends; *n* is the  
652 number of independent biological replicates, unless specifically indicated otherwise in the figure  
653 legend. The respective *n* values are shown in the figure legends. The mice used for bone marrow  
654 transplantation were randomized and no blinding protocol was used. No statistical method was  
655 used to pre-determine the sample sizes. The results were quantified using GraphPad Prism 8. *P*  
656 values were generated using two-tailed unpaired/paired Student's *t*-tests as indicated.

657

### 658 **Study approval**

659 All protocols described in this study were approved by the Baylor College of Medicine  
660 Institutional Animal Care and Use Committee or Case Western Reserve University Institutional  
661 Animal Care and Use Committee.

662

### 663 **Data availability**

664 Sequencing data have been deposited in GEO under accession code GSE173993. All the  
665 numerical data and the original western blots supporting the findings of this study are provided  
666 in the source data submitted with the manuscript.

667 **Figure Legends**

668 **Figure 1. Protein quality control in  $\beta$ -selected thymocytes**

669 **(A)**, Schematic of labeling and detection of nascent protein with OP-Puro. OP-Puro (O-propargyl  
670 puromycin) is a cell-permeable puromycin analog that is incorporated into the C-terminus of  
671 newly synthesized peptide chain. Fluorophore conjugated with Alexa Fluor 647 was then  
672 attached to OP-Puro through a copper-catalyzed click chemistry reaction between alkyne and  
673 azide group, which quantifies protein synthesis by fluorescence intensity .

674 **(B)**, Representative histogram (**left**) and quantification (**right**) of OP-Puro incorporation in  
675 different thymocyte subsets from 8-week-old wild-type mice. FMO represents AF647 control  
676 which is the background from the click chemistry in the absence of OP-Puro. MFI, mean  
677 fluorescence intensity.  $n = 4$  mice.

678 **(C)**, Quantification of tetraphenylethene maleimide (TMI) fluorescence in different thymocyte  
679 subsets from 8-week-old wild-type mice.  $n = 7$  mice.

680 **(D)**, Quantitative RT-PCR analysis of ERAD (*Sell1*) and UPR-related (*Xbp1*, *Bip*, *Dnajb9*, *Ddit3*  
681 (*Chop*), *Atf4*) genes expression in different thymocyte subsets from 6-week-old wild-type mice.  
682 Data are presented relative to *Actin*;  $n = 3$  mice.

683 **(B-D)**, ETP: early T lineage precursor ( $\text{Lin}^- \text{CD4}^- \text{CD8}^- \text{CD44}^+ \text{CD25}^- \text{CD117}^+$ ); DN2: double  
684 negative 2 thymocytes ( $\text{Lin}^- \text{CD4}^- \text{CD8}^- \text{CD44}^+ \text{CD25}^+$ ); DN3: double negative 3 thymocytes  
685 ( $\text{Lin}^- \text{CD4}^- \text{CD8}^- \text{CD44}^- \text{CD25}^+$ ); DN4: double negative 4 thymocytes ( $\text{Lin}^- \text{CD4}^- \text{CD8}^- \text{CD44}^-$   
686  $\text{CD25}^-$ ); DP: double positive thymocytes ( $\text{Lin}^- \text{CD4}^+ \text{CD8}^+$ ); SP4: CD4 single positive  
687 thymocytes ( $\text{Lin}^- \text{CD4}^+ \text{CD8}^-$ ); SP8: CD8 single positive thymocytes ( $\text{Lin}^- \text{CD4}^- \text{CD8}^+$ ).

688 Results are shown as mean  $\pm$  s.d. The statistical significance was calculated by one-way ANOVA  
689 with Bonferroni test.  $*P < 0.05$ ,  $**P < 0.01$ ,  $***P < 0.001$ ,  $****P < 0.0001$ , n.s., not significant.

690 **Figure 2. SEL1L is required for  $\alpha\beta$  T cell development**

691 **(A)**, Images of thymus from 6-8-week-old control (Ctrl, *Sell1<sup>fllox/fllox</sup>*) and *Sell1<sup>CD2</sup>* (*Sell1<sup>fllox/fllox</sup>*;  
692 *hCD2-iCre*) mice. *n*=3.

693 **(B and C)**, Thymus weight **(B)** and thymus cellularity **(C)** of age and gender-matched control  
694 (Ctrl, *Sell1<sup>fllox/fllox</sup>*) and *Sell1<sup>CD2</sup>*-KO (*Sell1<sup>fllox/fllox</sup>*; *hCD2-iCre*) mice. *n* =4.

695 **(D)**, Representative images of H&E staining of thymus from 6~8-week-old control (Ctrl,  
696 *Sell1<sup>fllox/fllox</sup>*) and *Sell1<sup>CD2</sup>*-KO (*Sell1<sup>fllox/fllox</sup>*; *hCD2-iCre*) mice. Scale bars are indicated. C: Cortex.  
697 M: Medulla.

698 **(E and F)**, Quantification of cell numbers of the indicated thymocyte subsets in 6-8-week-old  
699 control (Ctrl, *Sell1<sup>fllox/fllox</sup>*) and *Sell1<sup>CD2</sup>*-KO (*Sell1<sup>fllox/fllox</sup>*; *hCD2-iCre*) mice. *n*=4.

700 **(G)**, Schematic depiction of the competitive bone marrow transplantation (BMT) experiment  
701 using whole bone marrow cells from control (Ctrl, *Sell1<sup>fllox/fllox</sup>*) or *Sell1<sup>CD2</sup>*-KO (*Sell1<sup>fllox/fllox</sup>*;  
702 *hCD2-iCre*) mice as donors.

703 **(H and I)**, Representative flow cytometry plots **(H)** and percentage **(I)** of control (Ctrl,  
704 *Sell1<sup>fllox/fllox</sup>*) or *Sell1<sup>CD2</sup>*-KO donor-derived thymocyte subsets in the recipient mice 14 weeks after  
705 transplantation. *n* = 4-5.

706 **(J)**, Schematic overview of OP9-DL1 cell co-culture system. Sorted DN2 or DN3 cells from  
707 control (Ctrl) or *Sell1<sup>CD2</sup>*-KO mice were cultured on a monolayer of OP9 -DL1 cells  
708 supplemented with IL-7 and Flt3.

709 **(K, L, M)**, Representative pseudocolor plots **(K)** and percentage of DN3 **(L)** or DN4 **(M)** in DN  
710 thymocytes at indicated time points after *in vitro* co-culture of equal number of control (Ctrl,  
711 *Sell1<sup>fllox/fllox</sup>*) or *Sell1<sup>CD2</sup>*-KO DN2 cells on OP9-DL1 cells supplemented with IL-7 and Flt3. *n*=3.

712 Results are shown as mean  $\pm$  s.d. The statistical significance was calculated by two-tailed  
713 unpaired t-test (**B, C, E, F, I**) or two-way ANOVA with Bonferroni test (**L, M**). \* $P < 0.05$ ,  
714 \*\* $P < 0.01$ , \*\*\* $P < 0.001$ , \*\*\*\* $P < 0.0001$ , n.s., not significant.

715

### 716 **Figure 3. SEL1L is required for thymocyte survival at the $\beta$ -selection checkpoint**

717 **(A)**, Quantification of BrdU incorporation in different thymocyte subsets from 6-week-old  
718 control (Ctrl, *Sel1l<sup>fllox/fllox</sup>*) or *Sel1l<sup>CD2</sup>*-KO mice.  $n=3-4$ .

719 **(B and C)**, Cell cycle analysis of DN4 thymocytes in 6-week-old control (Ctrl, *Sel1l<sup>fllox/fllox</sup>*) and  
720 *Sel1l<sup>CD2</sup>* mice using Ki67 and DAPI. Representative flow cytometry plots (**B**) and quantification  
721 (**C**) are shown.  $n=3$ .

722 **(D)**, Quantification of apoptotic Ctrl or *Sel1l<sup>CD2</sup>*-KO DN3 thymocytes co-cultured with OP9-DL1  
723 cells *in vitro* for 2 days.  $n = 3$ .

724 **(E and F)**, Representative images (**E**) and quantification (**F**) of cleaved caspase-3 (CC3) positive  
725 cells in the thymus of 6-8-week-old control (Ctrl, *Sel1l<sup>fllox/fllox</sup>*) or *Sel1l<sup>CD2</sup>*-KO mice. 16 fields  
726 were counted at 20 $\times$  magnification from 4 Ctrl or *Sel1l<sup>CD2</sup>* mice. Scale bars are indicated.

727 **(G and H)**, Representative images (**G**) and quantification (**H**) of TUNEL positive cells in the  
728 thymus of 6-8-week-old control (Ctrl, *Sel1l<sup>fllox/fllox</sup>*) or *Sel1l<sup>CD2</sup>* mice.  $n=4$ . Scale bar, 20  $\mu$ M.

729 Results are shown as mean  $\pm$  s.d. The statistical significance was calculated by two-tailed  
730 unpaired t-test (**D, F, H**) or two-way ANOVA with Bonferroni test (**A, C**). \* $P < 0.05$ , \*\* $P <$   
731 0.01, \*\*\* $P < 0.001$ , \*\*\*\* $P < 0.0001$ , n.s., not significant.

732

733

734



735 **Figure 4. Notch directly regulates transcription of ERAD genes**

736 **(A)**, Quantification of surface NOTCH1 levels in different thymocyte subsets from wild-type  
737 mice. MFI, mean fluorescence intensity.  $n=4$  mice.

738 **(B)**. Quantitative RT-PCR analysis of ERAD genes (*Sell1*, *Hrd1*, *Os9*, *Edem1*) expression in  
739 EL4 cells after stimulation with 5  $\mu\text{g/ml}$  Delta ligand 4 (DLL4) for 24h. Data are presented  
740 relative to *Actin*.  $n=3$ .

741 **(C)**, Western blot analysis of SEL1L level in EL4 cells after stimulation with Delta ligand 4  
742 (DLL4) for 12h.  $\beta$ -ACTIN was used as loading control. The original western blot images are  
743 provided in **Figure 4-source data 1**.

744 **(D)**, Quantitative RT-PCR analysis of ERAD genes (*Sell1*, *Hrd1*, *Os9*, *Edem1*) expression in  
745 primary DN3 thymocytes treated with 2 $\mu\text{M}$   $\gamma$ -secretase inhibitor DAPT for 5 h. Data are  
746 presented relative to *Actin*.  $n=3$ .

747 **(E)**, Conserved RBP-J binding motif (**Red**) within the promoters of *Sell1* and *Hrd1*. Alignment  
748 of the *Sell1* (**Upper**) or *Hrd1* (**lower**) promoter from genomic sequence from human, mouse and  
749 rat. The numbering corresponds to the mouse sequence and is relative to the transcription start  
750 site (TSS). Mutations of the RBP-J binding motifs within *Sell1* or *Hrd1* promoter luciferase  
751 reporters (as in **L**, **M**) are shown.

752 **(F-I)**. **Upper**: Schematic diagram of the ChIP primer (P1-P3) locations across the *Sell1* (**F**),  
753 *Hrd1* (**G**), *Edem1* (**H**), or *Os9* (**I**) promoter regions. TSS: transcription start site. **Lower**:  
754 Chromatin extracts from EL4 cells treated with PBS or 5  $\mu\text{g/ml}$  DLL4 for 24h were subjected to  
755 ChIP using anti-RBP-J antibody, anti-NICD antibody, or normal IgG. Genomic regions of *Sell1*  
756 (**F**), *Hrd1* (**G**), *Edem1* (**H**), or *Os9* (**I**) promoter (as in left panel) were tested for enrichment of  
757 RBP-J, NICD or IgG. Data are shown as percentage of input.

758 **(J)**, *Sell1* or *Hrd1* promoter luciferase reporter was co-transfected with empty vector or different  
759 doses of NICD into HEK293T cells, and luciferase activity was measured 36 hours after  
760 transfection. pGL3 basic was used as control.

761 **(K and L)**, Wild-type or mutant (RBP-J motif mutations, as shown in **e**) *Sell1* (**k**) or *Hrd1* (**l**)  
762 promoter luciferase reporter was transfected into EL4 cells which were treated with PBS or 5  
763  $\mu\text{g/ml}$  DLL4 for 24 hours before harvest. Luciferase activity was measured 36 hours after  
764 transfection.

765 All luciferase data are presented relative to *Renilla* readings. Data are shown as mean  $\pm$  s.d.  
766 Two-tailed Student's t-tests (**A, B, D, F-I, K, L**) or one-way ANOVA with Bonferroni test (**J**)  
767 were used to calculate *P* values. n.s., not significant, \**P* < 0.05, \*\**P* < 0.01, \*\*\**P* < 0.001,  
768 \*\*\*\**P* < 0.0001.

769

## 770 **Figure 5. *Sell1*-deficiency triggers unresolved ER stress during $\beta$ -selection**

771 **(A)**, Heatmap showing differentially expressed genes from the RNA-seq analysis of DN3  
772 thymocytes sorted from control (Ctrl, *Sell1*<sup>lox/lox</sup>) or *Sell1*<sup>CD2</sup>-KO mice. *n*=4.

773 **(B)**, Gene Ontology (GO) analysis of the most significantly upregulated pathways in *Sell1*<sup>CD2</sup>-  
774 KO DN3 thymocytes compared with control (Ctrl, *Sell1*<sup>lox/lox</sup>) DN3 thymocytes.

775 **(C-E)**, Plots from GSEA analysis showing enrichment of Unfolded Protein Response (**C**),  
776 IRE1 $\alpha$  (**D**), and PERK (**E**) pathways in *Sell1*<sup>CD2</sup>-KO DN3 thymocytes compared to control (Ctrl,  
777 *Sell1*<sup>lox/lox</sup>) DN3 thymocytes.

778 **(F and G)**, Representative histogram (**F**) and quantification(**G**) of ER-tracker staining in DN3  
779 thymocytes sorted from control (Ctrl, *Sell1*<sup>lox/lox</sup>) and *Sell1*<sup>CD2</sup>-KO mice. Ctrl: *n* =4; *Sell1*<sup>CD2</sup>-  
780 KO: *n*=3. MFI, mean fluorescence intensity.

781 **(H)**, Western blot analysis of UPR pathway markers in primary DN3 thymocytes sorted from 6-  
782 week-old Ctrl or *Sell1<sup>CD2</sup>*-KO mice.  $\beta$ -ACTIN was used as loading control. The original western  
783 blot images are provided in **Figure 5 - source data 1**.

784 **(I)**, PCR analysis of XBP1-splicing in DN3 thymocytes sorted from Ctrl or *Sell1<sup>CD2</sup>* mice.  
785 Xbp1u: Unspliced Xbp1; Xbp1s: Spliced Xbp1.  $\beta$ -ACTIN was used as loading control. The  
786 original gel images are provided in **Figure 5 - source data 2**.

787 **(J and K)**, Representative histogram **(J)** and quantification **(K)** of unfolded/misfolded protein  
788 level measured by TMI in DN3 thymocytes sorted from Ctrl or *Sell1<sup>CD2</sup>*-KO mice.  $n = 3$ .

789 **(L)**, Schematic illustration of labeling and detection of misfolded and aggregated proteins with  
790 ProteoStat dye.

791 **(M and N)**, Representative images **(M)** and quantification **(N)** of protein aggregation measured  
792 by ProteoStat Protein Aggregation Detection Kit in primary DN3 thymocytes sorted from 3  
793 pooled Ctrl or *Sell1<sup>CD2</sup>* mice.

794 Results are shown as mean  $\pm$  s.d. Two-tailed Student's t-tests **(G, K, N)** was used to calculate  $P$   
795 values.  $**P < 0.01$ ,  $***P < 0.001$ ,  $****P < 0.0001$ .

796

797 **Figure 6. PERK signaling drives  $\beta$ -selected thymocyte apoptosis in *Sell1<sup>CD2</sup>*-KO mouse**

798 **(A and B)**, Representative images of thymus **(A)** and quantification of total thymocytes, DP, SP4  
799 and SP8 thymocytes **(B)** from age (6-week-old) and gender-matched control (Ctrl, *Sell1<sup>fllox/fllox</sup>*),  
800 *Sell1*-KO (*Sell1<sup>fllox/fllox</sup>; hCD2-iCre*), *Perk*-KO (*Perk<sup>fllox/fllox</sup>; hCD2-iCre*) and *Sell1/Perk* double  
801 knockout (DKO. *Sell1<sup>fllox/fllox</sup>, Perk<sup>fllox/fllox</sup>; hCD2-iCre*) mice.  $n = 3-5$  each group.

802 **(C and D)**, Representative images of spleen **(C)** and quantification of total splenocytes, total  
803 CD3<sup>+</sup> T cells, CD4<sup>+</sup> T cells, and CD8<sup>+</sup> T cells **(D)** from the same mice with indicated genotype as  
804 in **A** and **B**.  $n = 3-5$  each group.

805 **(E and F)**, Representative images of the inguinal (left) lymph node **(E)** and quantification of  
806 total lymphocytes, total CD3<sup>+</sup> T cells, CD4<sup>+</sup> T cells, and CD8<sup>+</sup> T cells **(F)** from the same mice  
807 with indicated genotype as in **A** and **B**.  $n = 3-5$  each group.

808 **(G)**, Quantitative RT-PCR analysis of *Chop* expression in DN3 thymocytes sorted from mice  
809 with indicated genotype.  $n = 3-5$  each group.

810 **(H and I)**, Representative images **(H)** and quantification **(I)** of cleaved caspase-3 (CC3) positive  
811 cells in the thymus of 6-8-week-old gender-matched mice with indicated genotype. 12 fields  
812 were counted at 20× magnification from 4 mice with indicated genotype. Scale bars are  
813 indicated.

814 Data are representative of three independent experiments and are shown as mean ± s.d. The  
815 statistical significance was calculated by two-tailed unpaired t-test **(D, F)**, One-way ANOVA  
816 with turkey test **(B, G)** or one-way ANOVA with Bonferroni test **(I)**. ns, not significant,  $*P <$   
817  $0.05$ ,  $**P < 0.01$ ,  $***P < 0.001$ ,  $****P < 0.0001$ .

818

819 **Figure 1 - figure supplement 1. Diagrams and representative flow cytometry gates used in**  
820 **this study.**

821 **(A)**, Diagram showing two ER quality control machineries: ERAD and UPR. The E3 ubiquitin  
822 ligase HRD1 and its adaptor protein SEL1L is the most conserved ERAD complex in mammals.  
823 While correctly folded proteins exit the ER, misfolded proteins in the ER are recruited to the  
824 SEL1L-HRD1 complex through ER chaperones (such as BiP, EDEM, and OS9), and then

825 retrotranslocated into the cytosol, ubiquitinated and degraded by the proteasome. Failure to clear  
826 the misfolded or unfolded proteins in the ER activates the UPR signaling through three ER stress  
827 sensors IRE1 $\alpha$ , ATF6 and PERK. Upon activation, IRE1 $\alpha$  oligomerizes and undergoes *trans*-  
828 autophosphorylation to activate its RNase domain, resulting in the removal of 26 nucleotides  
829 from unspliced *XBPI* (*XBPI<sub>u</sub>*) mRNA to produce mature, spliced *XBPI* (*XBPI<sub>s</sub>*) mRNA. PERK  
830 is a serine-threonine kinase. ER stress induces PERK-dependent eIF2 $\alpha$  phosphorylation and  
831 subsequent increased cap-independent translation of ATF4 and induction of CHOP.

832 **(B)**, Schematic diagram of T-cell development in the thymus. CLP: common lymphoid  
833 progenitors; ETP: early T lineage precursor (Lin<sup>-</sup> CD4<sup>-</sup> CD8<sup>-</sup> CD44<sup>+</sup> CD25<sup>-</sup> CD117<sup>+</sup>); DN2:  
834 double negative 2 thymocytes (Lin<sup>-</sup> CD4<sup>-</sup> CD8<sup>-</sup> CD44<sup>+</sup> CD25<sup>+</sup>); DN3: double negative 3  
835 thymocytes (Lin<sup>-</sup> CD4<sup>-</sup> CD8<sup>-</sup> CD44<sup>-</sup> CD25<sup>+</sup>); DN4: double negative 4 thymocytes (Lin<sup>-</sup> CD4<sup>-</sup>  
836 CD8<sup>-</sup> CD44<sup>-</sup> CD25<sup>-</sup>); ISP: immature single-positive thymocytes (Lin<sup>-</sup>CD8<sup>+</sup>CD24<sup>+</sup>TCR $\beta$ ); DP:  
837 double positive thymocytes (Lin<sup>-</sup> CD4<sup>+</sup> CD8<sup>+</sup>); SP4: CD4 single positive thymocytes (Lin<sup>-</sup> CD4<sup>+</sup>  
838 CD8<sup>-</sup>); SP8: CD8 single positive thymocytes (Lin<sup>-</sup> CD4<sup>-</sup> CD8<sup>+</sup>).

839 **(C)**, Representative pseudocolor plots showing the gating strategy to identify different thymocyte  
840 subsets in the thymus.

841

## 842 **Figure 2 - figure supplement 1. UPR is dispensible for $\alpha\beta$ T cell development**

843 **(A)**, Quantitative RT-PCR analysis of *Sell1* expression in murine bone marrow progenitors and  
844 different thymocyte subsets from control (Ctrl, *Sell1<sup>fllox/fllox</sup>*) or *Sell1<sup>CD2</sup>-KO* (*Sell1<sup>fllox/fllox</sup>; hCD2-*  
845 *iCre*) mice. Data are presented relative to *Actin*. *n* = 4. LMPP: lymphoid-primed multipotent  
846 progenitor.

847 **(B)**, Western blot analysis of SEL1L protein in sorted DN3 and DN4 thymocytes from Ctrl or  
848 *Sell1<sup>CD2</sup>* mice.  $\beta$ -ACTIN was used as loading control. The original western blot images are  
849 provided in **Figure 2 - figure supplement 1- source data 1**.

850 **(C-F)**, Representative images of thymus **(C)**, thymus cellularity **(D)**, cell numbers of indicated  
851 populations in the thymus **(E)** and peripheral splenocyte numbers of indicated populations **(F)**  
852 from age and gender-matched control (Ctrl, *Perk1<sup>lox/lox</sup>*) or *Perk<sup>CD2</sup>-KO* (*Perk1<sup>lox/lox</sup>; hCD2-iCre*)  
853 mice.  $n = 4$ .

854 **(G-J)**, Representative images of thymus **(G)**, thymus cellularity **(H)**, cell numbers of indicated  
855 populations in the thymus **(I)** and peripheral splenocyte numbers of indicated populations **(J)**  
856 from age and gender-matched control (Ctrl, *Xbp1<sup>lox/lox</sup>*) or *Xbp1<sup>CD2</sup>-KO* (*Xbp1<sup>lox/lox</sup>; hCD2-*  
857 *iCre*) mice.  $n = 3-4$ .

858 **(K-N)**, Representative images of thymus **(K)**, thymus cellularity **(L)**, cell numbers of indicated  
859 populations in the thymus **(M)** and peripheral splenocyte numbers of indicated populations **(N)**  
860 from age and gender-matched control (Ctrl, *Atf6<sup>lox/lox</sup>*) and *Atf6<sup>Vav</sup>-KO* (*Atf6<sup>lox/lox</sup>; Vav-iCre*)  
861 mice.  $n = 5$ .

862 **(O)**, Images of spleen from 6-8 week-old control (Ctrl, *Sell1<sup>lox/lox</sup>*) and *Sell1<sup>CD2</sup>-KO*  
863 (*Sell1<sup>lox/lox</sup>; hCD2-iCre*) mice.

864 **(P)**, Quantification of cell numbers of the indicated populations in the spleen of 6-8 week-old  
865 control (Ctrl, *Sell1<sup>lox/lox</sup>*) and *Sell1<sup>CD2</sup>-KO* (*Sell1<sup>lox/lox</sup>; hCD2-iCre*) mice.

866 **(Q)**, Images of the inguinal (left) lymph nodes from 6-8 week-old control (Ctrl, *Sell1<sup>lox/lox</sup>*) and  
867 *Sell1<sup>CD2</sup>-KO* (*Sell1<sup>lox/lox</sup>; hCD2-iCre*) mice.

868 **(R)**, Quantification of cell numbers in the lymph nodes of 6-8 week-old control (Ctrl,  
869 *Sell1<sup>lox/lox</sup>*) and *Sell1<sup>CD2</sup>-KO* (*Sell1<sup>lox/lox</sup>; hCD2-iCre*) mice.  $n = 4$ .

870 **(S)**, Quantification of cell numbers of  $\gamma\delta$  T cells from 6-8 week-old control (Ctrl, *Sell1<sup>flox/flox</sup>*) and  
871 *Sell1<sup>CD2</sup>-KO* (*Sell1<sup>flox/flox</sup>; hCD2-iCre*) mice. Ctrl:  $n=4$ . *Sell1<sup>CD2</sup>-KO*:  $n=5$ .  
872 Data are representative of three independent experiments and are shown as mean  $\pm$  s.d. Two-  
873 tailed Student's t-tests (**A, D-F, H-J, L-N, P, R, S**) was used to calculate  $P$  values. n.s., not  
874 significant, \* $P < 0.05$ , \*\* $P < 0.01$ , \*\*\* $P < 0.001$ , \*\*\*\* $P < 0.0001$ .

875

876 **Figure 2 - figure supplement 2. SEL1L is required for DN to DP thymocyte transition**  
877 **following  $\beta$  selection**

878 **(A)**, Representative flow cytometry plots of different thymocyte subsets in control (Ctrl,  
879 *Sell1<sup>flox/flox</sup>*) and *Sell1<sup>CD2</sup>-KO* (*Sell1<sup>flox/flox</sup>; hCD2-iCre*) mice.

880 **(B)**, Diagram showing different stages of *hCD2-iCre* and *CD4-iCre* initiated gene depletion  
881 during T cell development.

882 **(C)**, Quantitative RT-PCR analysis of *Sell1* in different thymocyte subsets from control (Ctrl,  
883 *Sell1<sup>flox/flox</sup>*) and *Sell1<sup>CD4</sup>-KO* (*Sell1<sup>flox/flox</sup>; CD4-iCre*) mice. Data are presented relative to *Actin*.

884  $n = 3$ .

885 **(D and E)**, Representative images of thymus **(D)** and quantification of thymus cellularity **(E)** in  
886 6-8 week-old control (Ctrl, *Sell1<sup>flox/flox</sup>*) and *Sell1<sup>CD4</sup>-KO* (*Sell1<sup>flox/flox</sup>; CD4-iCre*) mice.  $n = 3$ .

887 **(F and G)**, Quantification of cell numbers of different thymocyte subsets from control (Ctrl,  
888 *Sell1<sup>flox/flox</sup>*) and *Sell1<sup>CD4</sup>-KO* (*Sell1<sup>flox/flox</sup>; CD4-iCre*) mice.  $n=3$ .

889 **(H)**. Percentage of Ctrl or *Sell1<sup>CD2</sup>-KO* donor-derived progenitors in the bone marrow of  
890 recipient mice 14 weeks after transplantation.  $n =4-5$ .

891 **(I)**, Quantification of Ctrl or *Sell1<sup>CD2</sup>-KO* donor-derived DN3/DN4 ratio.  $n =4-5$ .

892 **(J)**, Percentage of Ctrl or *Sell1<sup>CD2</sup>*-KO donor-derived CD4<sup>+</sup> T cells, CD8<sup>+</sup> T cells, myeloid cells,  
893 and dendritic cells (DC) in the spleen of recipient mice 14 weeks after transplantation.  $n = 4-5$ .

894 **(K and L)**, Cell cycle analysis of DN3 thymocytes in 6-week-old control (Ctrl) and *Sell1<sup>CD2</sup>*  
895 mice using Ki67 and DAPI. Representative flow cytometry plots **(K)** and quantification **(L)** are  
896 shown.  $n = 3$ .

897 Data are shown as mean  $\pm$  s.d. The statistical significance was calculated by two-tailed unpaired  
898 t-test **(C, E-J)** or Two-way ANOVA with Bonferroni test **(L)**. n.s., not significant,  $*P < 0.05$ ,  
899  $**P < 0.01$ ,  $***P < 0.001$ ,  $****P < 0.0001$ .

900

901 **Figure 4 - figure supplement 1. Notch signal regulates ERAD genes expression.**

902 **(A)**, Quantitative RT-PCR analysis of Notch target genes expression in EL4 cells after  
903 stimulation with 5  $\mu$ g/ml Delta ligand 4 (DLL4) for 24h. Data are presented relative to *Actin*.  
904  $n=3$ .

905 **(B)**, Quantitative RT-PCR analysis of Notch target genes expression in primary DN3 thymocytes  
906 treated with 2 $\mu$ M  $\gamma$ -secretase inhibitor DAPT for 5 hours. Data are presented relative to *Actin*.  
907  $n=3$ .

908 **(C)**, Expression of Notch1 on cell surface of different thymocyte subsets from control (Ctrl,  
909 *Sell1<sup>fllox/fllox</sup>*) and *Sell1<sup>CD2</sup>*-KO (*Sell1<sup>fllox/fllox</sup>; hCD2-iCre*) mice. Ctrl:  $n = 2$ . *Sell1<sup>CD2</sup>*-KO:  $n=4$ .  
910 Data are shown as mean  $\pm$  s.d. Two-tailed Student's t-tests **(A-C)** was used to calculate  $P$  values.  
911 n.s., not significant,  $*P < 0.05$ ,  $**P < 0.01$ ,  $***P < 0.001$ ,  $****P < 0.0001$ .

912

913 **Figure 5 - figure supplement 1. SEL1L is not required for TCR $\beta$  gene rearrangement and**  
914 **pre-TCR signaling.**



915 **(A)**, PCR analysis of *Vβ5-Jβ2*, *Vβ8-Jβ2* and *Vβ11-Jβ2* gene rearrangements using genomic  
916 DNA of DN3 and DN4 thymocytes sorted from control (Ctrl, *Sell1<sup>fllox/fllox</sup>*) or *Sell1<sup>CD2</sup>-KO*  
917 (*Sell1<sup>fllox/fllox</sup>; hCD2-iCre*) mice. The original gel images are provided in **Figure 5 - figure**  
918 **supplement 1- source data 1.**

919 **(B and C)**, Representative flow cytometry plots **(B)** and quantification **(C)** of intracellular TCRβ  
920 positive cells in DN3a, DN3b and DN4 thymocytes from Ctrl or *Sell1<sup>CD2</sup>-KO* mice. *n* = 5.  
921 **(D)**, Western blot analysis of the expression of proteins involved in pre-TCR signaling in  
922 primary DN3 and DN4 thymocytes sorted from Ctrl or *Sell1<sup>CD2</sup>* mice. β-ACTIN was used as  
923 loading control. The original western blot images are provided in **Figure 5 - figure supplement**  
924 **1- source data 2.**

925 **(E-H)**, Representative pseudocolor plots **(E)**, quantification of total thymocytes **(F)** and cell  
926 numbers of indicated populations **(G and H)** from OT-II.Ctrl (*OT-II; Sell1<sup>fllox/fllox</sup>*) or OT-  
927 II.*Sell1<sup>CD2</sup>* (*OT-II; Sell1<sup>fllox/fllox</sup>; hCD2-iCre*) mice. OT-II.Ctrl: *n* = 7. OT-II.*Sell1<sup>CD2</sup>*: *n* = 6.  
928 Data are shown as mean ± s.d. Two-tailed Student's t-tests **(C, F-H)** was used to calculate *P*  
929 values. n.s., not significant, \**P* < 0.05, \*\**P* < 0.01, \*\*\**P* < 0.001, \*\*\*\**P* < 0.0001.  
930

931 **Figure 5 - figure supplement 2. *Sell1* knockout induces ER stress.**

932 **(A)**, Western blot analysis of UPR pathway markers in primary DN4 thymocytes sorted from 6-  
933 week-old Ctrl or *Sell1<sup>CD2</sup>-KO* mice. β-ACTIN was used as loading control. The original western  
934 blot images are provided in **Figure 5 - figure supplement 2- source data 1.**

935 **(B)**, PCR analysis of XBP1-splicing in DN4 thymocytes sorted from Ctrl or *Sell1<sup>CD2</sup>* mice.  
936 Xbp1u: Unspliced Xbp1; Xbp1s: Spliced Xbp1. β-ACTIN was used as loading control. The  
937 original gel images are provided in **Figure 5 - figure supplement 2- source data 2.**

938 **(C and D)**, Quantitative RT-PCR analysis of ER chaperone genes expression in DN3 **(C)** and  
939 DN4 **(D)** thymocytes sorted from 6-week-old Ctrl or *Sell1*<sup>CD2</sup>-KO mice. Data are presented  
940 relative to *Actin*.  $n = 3$ . Data are shown as mean  $\pm$  s.d. Two-tailed Student's t-tests was used to  
941 calculate  $P$  values. n.s., not significant,  $*P < 0.05$ ,  $**P < 0.01$ ,  $***P < 0.001$ ,  $****P < 0.0001$ .

942

943 **Figure 6 - figure supplement 1. XBP1 functions as a compensatory adaptative mechanism**  
944 **in *Sell1*-KO mouse.**

945 **(A)**, Quantification of total cellularity and DP cell numbers of 6-8 week-old gender-matched  
946 control (Ctrl, *Sell1*<sup>fllox/fllox</sup>), *Sell1*-KO (*Sell1*<sup>fllox/fllox</sup>; *hCD2-iCre*), *Xbp1*-KO (*Xbp1*<sup>fllox/fllox</sup>; *hCD2-*  
947 *iCre*), and *Sell1/Xbp1* double knockout (DKO, *Sell1*<sup>fllox/fllox</sup>; *Xbp1*<sup>fllox/fllox</sup>; *hCD2-iCre*) mice.  $n = 3-$   
948 6/each group.

949 **(B)**, Quantitative RT-PCR analysis *Chop* expression in DN3 thymocytes sorted from mice with  
950 indicated genotype. Data are presented relative to *Actin*.

951 **(C)**, Cell cycle analysis of DN4 thymocytes from age (6-week-old) and gender-matched control  
952 (Ctrl, *Sell1*<sup>fllox/fllox</sup>), *Sell1*-KO (*Sell1*<sup>fllox/fllox</sup>; *hCD2-iCre*), *Perk*-KO (*Perk*<sup>fllox/fllox</sup>; *hCD2-iCre*) and  
953 *Sell1/Perk* double knockout (DKO. *Sell1*<sup>fllox/fllox</sup>; *Perk*<sup>fllox/fllox</sup>; *hCD2-iCre*) mice.  $n = 3-5$  each  
954 group.

955 Data are shown as mean  $\pm$  s.d. The statistical significance was calculated by two-tailed unpaired  
956 t-test **(A, B)** or One-way ANOVA with Turkey test **(C)**. n.s., not significant,  $*P < 0.05$ ,  $**P <$   
957  $0.01$ ,  $***P < 0.001$ ,  $****P < 0.0001$ .

958

959

960

961 **References**

962

963 Bai M, Doukas M, Papoudou-Bai A, Barbouti A, Stefanaki K, Galani V, Kanavaros P. 2013.

964 Immunohistological analysis of cell cycle and apoptosis regulators in thymus. *Ann Anat -*

965 *Anatomischer Anzeiger* **195**:159–165. doi:10.1016/j.aanat.2012.07.012

966 Balchin D, Hayer-Hartl M, Hartl FU. 2016. In vivo aspects of protein folding and quality control.

967 *Science* **353**:aac4354. doi:10.1126/science.aac4354

968 Balciunaite G, Ceredig R, Fehling H, Zúñiga-Pflücker J, Rolink AG. 2005. The role of Notch

969 and IL-7 signaling in early thymocyte proliferation and differentiation. *Eur J Immunol*

970 **35**:1292–1300. doi:10.1002/eji.200425822

971 Bettigole SE, Lis R, Adoro S, Lee A-H, Spencer LA, Weller PF, Glimcher LH. 2015. The

972 transcription factor XBP1 is selectively required for eosinophil differentiation. *Nat Immunol*

973 **16**:829–837. doi:10.1038/ni.3225

974 Boomen DJH van den, Lehner PJ. 2015. Identifying the ERAD ubiquitin E3 ligases for viral and

975 cellular targeting of MHC class I. *Mol Immunol* **68**:106–111.

976 doi:10.1016/j.molimm.2015.07.005

977 Bray SJ. 2016. Notch signalling in context. *Nat Rev Mol Cell Bio* **17**:722–735.

978 doi:10.1038/nrm.2016.94

979 Brodsky JL. 2012. Cleaning Up: ER-Associated Degradation to the Rescue. *Cell* **151**:1163–

980 1167. doi:10.1016/j.cell.2012.11.012

- 981 Bryksin AV, Matsumura I. 2010. Overlap extension PCR cloning: a simple and reliable way to  
982 create recombinant plasmids. *Biotechniques* **48**:463–465. doi:10.2144/000113418
- 983 Carpenter AC, Bosselut R. 2010. Decision checkpoints in the thymus. *Nat Immunol* **11**:666–673.  
984 doi:10.1038/ni.1887
- 985 Castel D, Mourikis P, Bartels SJJ, Brinkman AB, Tajbakhsh S, Stunnenberg HG. 2013. Dynamic  
986 binding of RBPJ is determined by Notch signaling status. *Gene Dev* **27**:1059–1071.  
987 doi:10.1101/gad.211912.112
- 988 Chen ELY, Thompson PK, Zúñiga-Pflücker JC. 2019. RBPJ-dependent Notch signaling initiates  
989 the T cell program in a subset of thymus-seeding progenitors. *Nat Immunol* **20**:1456–1468.  
990 doi:10.1038/s41590-019-0518-7
- 991 Chen MZ, Moily NS, Bridgford JL, Wood RJ, Radwan M, Smith TA, Song Z, Tang BZ, Tilley  
992 L, Xu X, Reid GE, Pouladi MA, Hong Y, Hatters DM. 2017. A thiol probe for measuring  
993 unfolded protein load and proteostasis in cells. *Nat Commun* **8**:474. doi:10.1038/s41467-017-  
994 00203-5
- 995 Ciofani M, Schmitt TM, Ciofani A, Michie AM, Çuburu N, Aublin A, Maryanski JL, Zúñiga-  
996 Pflücker JC. 2004. Obligatory Role for Cooperative Signaling by Pre-TCR and Notch during  
997 Thymocyte Differentiation. *J Immunol* **172**:5230–5239. doi:10.4049/jimmunol.172.9.5230
- 998 Ciofani M, Zúñiga-Pflücker JC. 2005. Notch promotes survival of pre-T cells at the  $\beta$ -selection  
999 checkpoint by regulating cellular metabolism. *Nat Immunol* **6**:881–888. doi:10.1038/ni1234

- 1000 Cox D, Raeburn C, Sui X, Hatters DM. 2018. Protein aggregation in cell biology: An  
1001 aggregomics perspective of health and disease. *Semin Cell Dev Biol* **99**:40–54.  
1002 doi:10.1016/j.semcdb.2018.05.003
- 1003 Cubillos-Ruiz JR, Silberman PC, Rutkowski MR, Chopra S, Perales-Puchalt A, Song M, Zhang  
1004 S, Bettigole SE, Gupta D, Holcomb K, Ellenson LH, Caputo T, Lee A-H, Conejo-Garcia JR,  
1005 Glimcher LH. 2015. ER Stress Sensor XBP1 Controls Anti-tumor Immunity by Disrupting  
1006 Dendritic Cell Homeostasis. *Cell* **161**:1527–1538. doi:10.1016/j.cell.2015.05.025
- 1007 Dong H, Adams NM, Xu Y, Cao J, Allan DSJ, Carlyle JR, Chen X, Sun JC, Glimcher LH. 2019.  
1008 The IRE1 endoplasmic reticulum stress sensor activates natural killer cell immunity in part by  
1009 regulating c-Myc. *Nat Immunol* **20**:865–878. doi:10.1038/s41590-019-0388-z
- 1010 Feige MJ, Behnke J, Mittag T, Hendershot LM. 2015. Dimerization-dependent Folding  
1011 Underlies Assembly Control of the Clonotypic  $\alpha\beta$ T Cell Receptor Chains\*. *J Biol Chem*  
1012 **290**:26821–26831. doi:10.1074/jbc.m115.689471
- 1013 Feige MJ, Hendershot LM. 2013. Quality Control of Integral Membrane Proteins by Assembly-  
1014 Dependent Membrane Integration. *Mol Cell* **51**:297–309. doi:10.1016/j.molcel.2013.07.013
- 1015 Freeden-Jeffrey U von, Solvason N, Howard M, Murray R. 1997. The Earliest T Lineage-  
1016 Committed Cells Depend on IL-7 for Bcl-2 Expression and Normal Cell Cycle Progression.  
1017 *Immunity* **7**:147–154. doi:10.1016/s1074-7613(00)80517-8
- 1018 Gegonne A, Chen Q-R, Dey A, Etzensperger R, Tai X, Singer A, Meerzaman D, Ozato K, Singer  
1019 DS. 2018. Immature CD8 Single-Positive Thymocytes Are a Molecularly Distinct

- 1020 Subpopulation, Selectively Dependent on BRD4 for Their Differentiation. *Cell Reports*  
1021 **24**:117–129. doi:10.1016/j.celrep.2018.06.007
- 1022 Hetz C, Martinon F, Rodriguez D, Glimcher LH. 2011. The Unfolded Protein Response:  
1023 Integrating Stress Signals Through the Stress Sensor IRE1 $\alpha$ . *Physiol Rev* **91**:1219–1243.  
1024 doi:10.1152/physrev.00001.2011
- 1025 Holmes R, Zúñiga-Pflücker JC. 2009. The OP9-DL1 System: Generation of T-Lymphocytes  
1026 from Embryonic or Hematopoietic Stem Cells In Vitro. *Cold Spring Harb Protoc*  
1027 **2009**:pdb.prot5156. doi:10.1101/pdb.prot5156
- 1028 Hwang J, Qi L. 2018. Quality Control in the Endoplasmic Reticulum: Crosstalk between ERAD  
1029 and UPR pathways. *Trends Biochem Sci* **43**:593–605. doi:10.1016/j.tibs.2018.06.005
- 1030 Iwakoshi NN, Pypaert M, Glimcher LH. 2007. The transcription factor XBP-1 is essential for the  
1031 development and survival of dendritic cells. *J Exp Medicine* **204**:2267–2275.  
1032 doi:10.1084/jem.20070525
- 1033 Jose LHS, Signer RAJ. 2019. Cell-type-specific quantification of protein synthesis in vivo. *Nat*  
1034 *Protoc* **14**:441–460. doi:10.1038/s41596-018-0100-z
- 1035 Jose LHS, Sunshine MJ, Dillingham CH, Chua BA, Kruta M, Hong Y, Hatters DM, Signer RAJ.  
1036 2020. Modest Declines in Proteome Quality Impair Hematopoietic Stem Cell Self-Renewal.  
1037 *Cell Reports* **30**:69-80.e6. doi:10.1016/j.celrep.2019.12.003

- 1038 Joseph C, Quach JM, Walkley CR, Lane SW, Lo Celso C, Purton LE. 2013. Deciphering  
1039 Hematopoietic Stem Cells in Their Niches: A Critical Appraisal of Genetic Models, Lineage  
1040 Tracing, and Imaging Strategies. *Cell Stem Cell* **13**:520–533. doi:10.1016/j.stem.2013.10.010
- 1041 Kadakia T, Tai X, Kruhlak M, Wisniewski J, Hwang I-Y, Roy S, Guinter TI, Alag A, Kehrl JH,  
1042 Zhuang Y, Singer A. 2019. E-protein–regulated expression of CXCR4 adheres preselection  
1043 thymocytes to the thymic cortexCXCR4 anchors preselection thymocytes to the cortex. *J Exp*  
1044 *Medicine* **216**:1749–1761. doi:10.1084/jem.20182285
- 1045 Kim J, Lee SK, Jeon Y, Kim Y, Lee C, Jeon SH, Shim J, Kim I, Hong S, Kim N, Lee H, Seong  
1046 RH. 2014. TopBP1 deficiency impairs V(D)J recombination during lymphocyte development.  
1047 *Embo J* **33**:217–228. doi:10.1002/embj.201284316
- 1048 Kreslavsky T, Gleimer M, Miyazaki M, Choi Y, Gagnon E, Murre C, Sicinski P, von Boehmer  
1049 H. 2012.  $\beta$ -Selection-Induced Proliferation Is Required for  $\alpha\beta$  T Cell Differentiation.  
1050 *Immunity* **37**:840–853. doi:10.1016/j.immuni.2012.08.020
- 1051 Maillard I, Tu L, Sambandam A, Yashiro-Ohtani Y, Millholland J, Keeshan K, Shestova O, Xu  
1052 L, Bhandoola A, Pear WS. 2006. The requirement for Notch signaling at the  $\beta$ -selection  
1053 checkpoint in vivo is absolute and independent of the pre–T cell receptor. *J Exp Medicine*  
1054 **203**:2239–2245. doi:10.1084/jem.20061020
- 1055 Mallick CA, Dudley EC, Viney JL, Owen MJ, Hayday AC. 1993. Rearrangement and diversity  
1056 of T cell receptor  $\beta$  chain genes in thymocytes: A critical role for the  $\beta$  chain in development.  
1057 *Cell* **73**:513–519. doi:10.1016/0092-8674(93)90138-g

- 1058 Marquis M, Daudelin J-F, Boulet S, Sirois J, Crain K, Mathien S, Turgeon B, Rousseau J,  
1059 Meloche S, Labrecque N. 2014. The Catalytic Activity of the Mitogen-Activated Protein  
1060 Kinase Extracellular Signal-Regulated Kinase 3 Is Required To Sustain CD4<sup>+</sup> CD8<sup>+</sup>  
1061 Thymocyte Survival. *Mol Cell Biol* **34**:3374–3387. doi:10.1128/mcb.01701-13
- 1062 Michie AM, Zúñiga-Pflücker JC. 2002. Regulation of thymocyte differentiation: pre-TCR  
1063 signals and  $\beta$ -selection. *Semin Immunol* **14**:311–323. doi:10.1016/s1044-5323(02)00064-7
- 1064 Nagelreiter F, Coats MT, Klanert G, Gludovacz E, Borth N, Grillari J, Schosserer M. 2018. OPP  
1065 Labeling Enables Total Protein Synthesis Quantification in CHO Production Cell Lines at the  
1066 Single-Cell Level. *Biotechnol J* **13**:1700492. doi:10.1002/biot.201700492
- 1067 Nakatsukasa K, Brodsky JL. 2008. The Recognition and Retrotranslocation of Misfolded  
1068 Proteins from the Endoplasmic Reticulum. *Traffic* **9**:861–870. doi:10.1111/j.1600-  
1069 0854.2008.00729.x
- 1070 Obaldia MED, Bell JJ, Wang X, Harly C, Yashiro-Ohtani Y, DeLong JH, Zlotoff DA, Sultana  
1071 DA, Pear WS, Bhandoola A. 2013. T cell development requires constraint of the myeloid  
1072 regulator C/EBP- $\alpha$  by the Notch target and transcriptional repressor Hes1. *Nat Immunol*  
1073 **14**:1277–1284. doi:10.1038/ni.2760
- 1074 Osorio F, Tavernier SJ, Hoffmann E, Saeys Y, Martens L, Veters J, Delrue I, Rycke RD,  
1075 Parthoens E, Pouliot P, Iwawaki T, Janssens S, Lambrecht BN. 2014. The unfolded-protein-  
1076 response sensor IRE-1 $\alpha$  regulates the function of CD8 $\alpha$ <sup>+</sup> dendritic cells. *Nat Immunol*  
1077 **15**:248–257. doi:10.1038/ni.2808



- 1078 Qi L, Tsai B, Arvan P. 2017. New Insights into the Physiological Role of Endoplasmic  
1079 Reticulum-Associated Degradation. *Trends Cell Biol* **27**:430–440.  
1080 doi:10.1016/j.tcb.2016.12.002
- 1081 Reimold AM, Iwakoshi NN, Manis J, Vallabhajosyula P, Szomolanyi-Tsuda E, Gravallesse EM,  
1082 Friend D, Grusby MJ, Alt F, Glimcher LH. 2001. Plasma cell differentiation requires the  
1083 transcription factor XBP-1. *Nature* **412**:300–307. doi:10.1038/35085509
- 1084 Ruggiano A, Foresti O, Carvalho P. 2014. ER-associated degradation: Protein quality control and  
1085 beyondER-associated degradation: Protein quality control and beyond. *J Cell Biology*  
1086 **204**:869–879. doi:10.1083/jcb.201312042
- 1087 Sambandam A, Maillard I, Zediak VP, Xu L, Gerstein RM, Aster JC, Pear WS, Bhandoola A.  
1088 2005. Notch signaling controls the generation and differentiation of early T lineage  
1089 progenitors. *Nat Immunol* **6**:663–670. doi:10.1038/ni1216
- 1090 Schmitt TM, Pooter RF de, Gronski MA, Cho SK, Ohashi PS, Zúñiga-Pflücker JC. 2004.  
1091 Induction of T cell development and establishment of T cell competence from embryonic  
1092 stem cells differentiated in vitro. *Nat Immunol* **5**:410–417. doi:10.1038/ni1055
- 1093 Shah DK, Zúñiga-Pflücker JC. 2014. An Overview of the Intrathymic Intricacies of T Cell  
1094 Development. *J Immunol* **192**:4017–4023. doi:10.4049/jimmunol.1302259
- 1095 Shapiro-Shelef M, Calame K. 2005. Regulation of plasma-cell development. *Nat Rev Immunol*  
1096 **5**:230–242. doi:10.1038/nri1572

- 1097 Shi J, Petrie HT. 2012. Activation Kinetics and Off-Target Effects of Thymus-Initiated Cre  
1098 Transgenes. *Plos One* **7**:e46590. doi:10.1371/journal.pone.0046590
- 1099 Siegemund S, Shepherd J, Xiao C, Sauer K. 2015. hCD2-iCre and Vav-iCre Mediated Gene  
1100 Recombination Patterns in Murine Hematopoietic Cells. *Plos One* **10**:e0124661.  
1101 doi:10.1371/journal.pone.0124661
- 1102 Sun S, Shi G, Han X, Francisco AB, Ji Y, Mendonça N, Liu X, Locasale JW, Simpson KW,  
1103 Duhamel GE, Kersten S, Yates JR, Long Q, Qi L. 2014. Sel1L is indispensable for  
1104 mammalian endoplasmic reticulum-associated degradation, endoplasmic reticulum  
1105 homeostasis, and survival. *Proc National Acad Sci* **111**:E582–E591.  
1106 doi:10.1073/pnas.1318114111
- 1107 Takahama Y. 2006. Journey through the thymus: stromal guides for T-cell development and  
1108 selection. *Nat Rev Immunol* **6**:127–135. doi:10.1038/nri1781
- 1109 Tanigaki K, Honjo T. 2007. Regulation of lymphocyte development by Notch signaling. *Nat*  
1110 *Immunol* **8**:451–456. doi:10.1038/ni1453
- 1111 Tong M, Suttapitugsakul S, Wu R. 2020. Effective Method for Accurate and Sensitive  
1112 Quantitation of Rapid Changes of Newly Synthesized Proteins. *Anal Chem* **92**:10048–10057.  
1113 doi:10.1021/acs.analchem.0c01823
- 1114 Tramont PC, Tosello-Tramont A-C, Shen Y, Duley AK, Sutherland AE, Bender TP, Littman  
1115 DR, Ravichandran KS. 2010. CXCR4 acts as a costimulator during thymic  $\beta$ -selection. *Nat*  
1116 *Immunol* **11**:162–170. doi:10.1038/ni.1830

- 1117 Walter P, Ron D. 2011. The Unfolded Protein Response: From Stress Pathway to Homeostatic  
1118 Regulation. *Science* **334**:1081–1086. doi:10.1126/science.1209038
- 1119 Wang Y, Zhang Y, Yi P, Dong W, Nalin AP, Zhang J, Zhu Z, Chen L, Benson DM, Mundy-  
1120 Bosse BL, Freud AG, Caligiuri MA, Yu J. 2019. The IL-15–AKT–XBP1s signaling pathway  
1121 contributes to effector functions and survival in human NK cells. *Nat Immunol* **20**:10–17.  
1122 doi:10.1038/s41590-018-0265-1
- 1123 Xu L, Liu X, Peng F, Zhang W, Zheng L, Ding Y, Gu T, Lv K, Wang J, Ortinau L, Hu T, Shi X,  
1124 Shi G, Shang G, Sun S, Iwawaki T, Ji Y, Li W, Rosen JM, Zhang XH-F, Park D, Adoro S,  
1125 Catic A, Tong W, Qi L, Nakada D, Chen X. 2020. Protein quality control through  
1126 endoplasmic reticulum-associated degradation maintains haematopoietic stem cell identity  
1127 and niche interactions. *Nat Cell Biol* **22**:1162–1169. doi:10.1038/s41556-020-00581-x
- 1128 Xu Y, Zhao F, Qiu Q, Chen K, Wei J, Kong Q, Gao B, Melo-Cardenas J, Zhang B, Zhang  
1129 Jinping, Song J, Zhang DD, Zhang Jianing, Fan Y, Li H, Fang D. 2016. The ER membrane-  
1130 anchored ubiquitin ligase Hrd1 is a positive regulator of T-cell immunity. *Nat Commun*  
1131 **7**:12073. doi:10.1038/ncomms12073
- 1132 Yamasaki S, Ishikawa E, Sakuma M, Ogata K, Sakata-Sogawa K, Hiroshima M, Wiest DL,  
1133 Tokunaga M, Saito T. 2006. Mechanistic basis of pre-T cell receptor–mediated autonomous  
1134 signaling critical for thymocyte development. *Nat Immunol* **7**:67–75. doi:10.1038/ni1290
- 1135 Zhao B, Yoganathan K, Li L, Lee JY, Zúñiga-Pflücker JC, Love PE. 2019. Notch and the pre-  
1136 TCR coordinate thymocyte proliferation by induction of the SCF subunits Fbx11 and Fbx12.  
1137 *Nat Immunol* **20**:1381–1392. doi:10.1038/s41590-019-0469-z

1138 Zhao N, Cao J, Xu L, Tang Q, Dobrolecki LE, Lv X, Talukdar M, Lu Y, Wang X, Hu DZ, Shi Q,  
1139 Xiang Y, Wang Y, Liu X, Bu W, Jiang Y, Li M, Gong Y, Sun Z, Ying H, Yuan B, Lin X,  
1140 Feng X-H, Hartig SM, Li F, Shen H, Chen Y, Han L, Zeng Q, Patterson JB, Kaiparettu BA,  
1141 Putluri N, Sicheri F, Rosen JM, Lewis MT, Chen X. 2018. Pharmacological targeting of  
1142 MYC-regulated IRE1/XBP1 pathway suppresses MYC-driven breast cancer. *J Clin Invest*  
1143 **128**:1283–1299. doi:10.1172/jci95873

1144

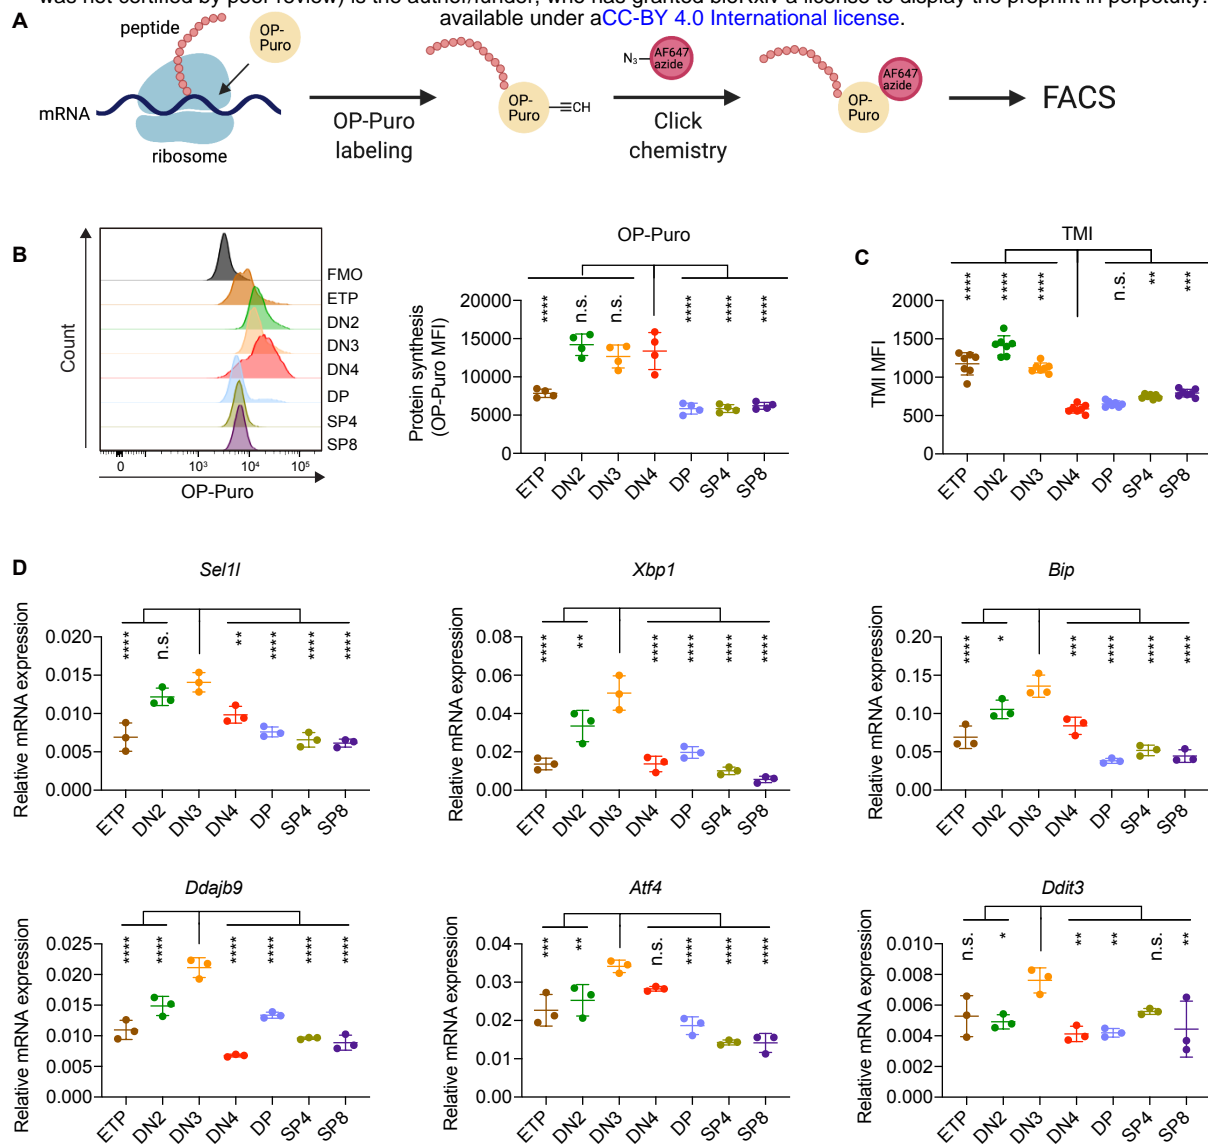

**Figure 1. Protein quality control in  $\beta$ -selected thymocytes.** (A), Schematic of labeling and detection of nascent protein with OP-Puro. OP-Puro (O-propargyl puromycin) is a cell-permeable puromycin analog that is incorporated into the C-terminus of newly synthesized peptide chain. Fluorophore conjugated with Alexa Fluor 647 was then attached to OP-Puro through a copper-catalyzed click chemistry reaction between alkyne and azide group, which quantifies protein synthesis with fluorescence intensity. (B), Representative histogram (left) and quantification (right) of OP-Puro incorporation in different thymocyte subsets from 8-week-old wild-type mice. FMO represents AF647 control which is the background from the click chemistry in the absence of OP-Puro. MFI, mean fluorescence intensity.  $n = 4$  mice. (C), Quantification of tetraphenylethene maleimide (TMI) fluorescence in different thymocyte subsets from 8-week-old wild-type mice.  $n = 7$  mice. (D), Quantitative RT-PCR analysis of ERAD (*Sel1l*) and UPR-related (*Xbp1*, *Bip*, *Dnajb9*, *Ddit3* (*Chop*), *Atf4*) genes expression in different thymocyte subsets from 6-week-old wild-type mice. Data are presented relative to *Actin*;  $n = 3$  mice. (B-D), ETP: early T lineage precursor (Lin<sup>-</sup> CD4<sup>-</sup> CD8<sup>-</sup> CD44<sup>+</sup> CD25<sup>-</sup> CD117<sup>+</sup>); DN2: double negative 2 thymocytes (Lin<sup>-</sup> CD4<sup>-</sup> CD8<sup>-</sup> CD44<sup>+</sup> CD25<sup>+</sup>); DN3: double negative 3 thymocytes (Lin<sup>-</sup> CD4<sup>-</sup> CD8<sup>-</sup> CD44<sup>+</sup> CD25<sup>+</sup>); DN4: double negative 4 thymocytes (Lin<sup>-</sup> CD4<sup>-</sup> CD8<sup>-</sup> CD44<sup>+</sup> CD25<sup>-</sup>); DP: double positive thymocytes (Lin<sup>-</sup> CD4<sup>+</sup> CD8<sup>+</sup>); SP4: CD4 single positive thymocytes (Lin<sup>-</sup> CD4<sup>+</sup> CD8<sup>-</sup>); SP8: CD8 single positive thymocytes (Lin<sup>-</sup> CD4<sup>-</sup> CD8<sup>+</sup>). Results are shown as mean  $\pm$  s.d. The statistical significance was calculated by One-way ANOVA with Bonferroni test. \* $P < 0.05$ , \*\* $P < 0.01$ , \*\*\* $P < 0.001$ , \*\*\*\* $P < 0.0001$ , n.s., not significant.

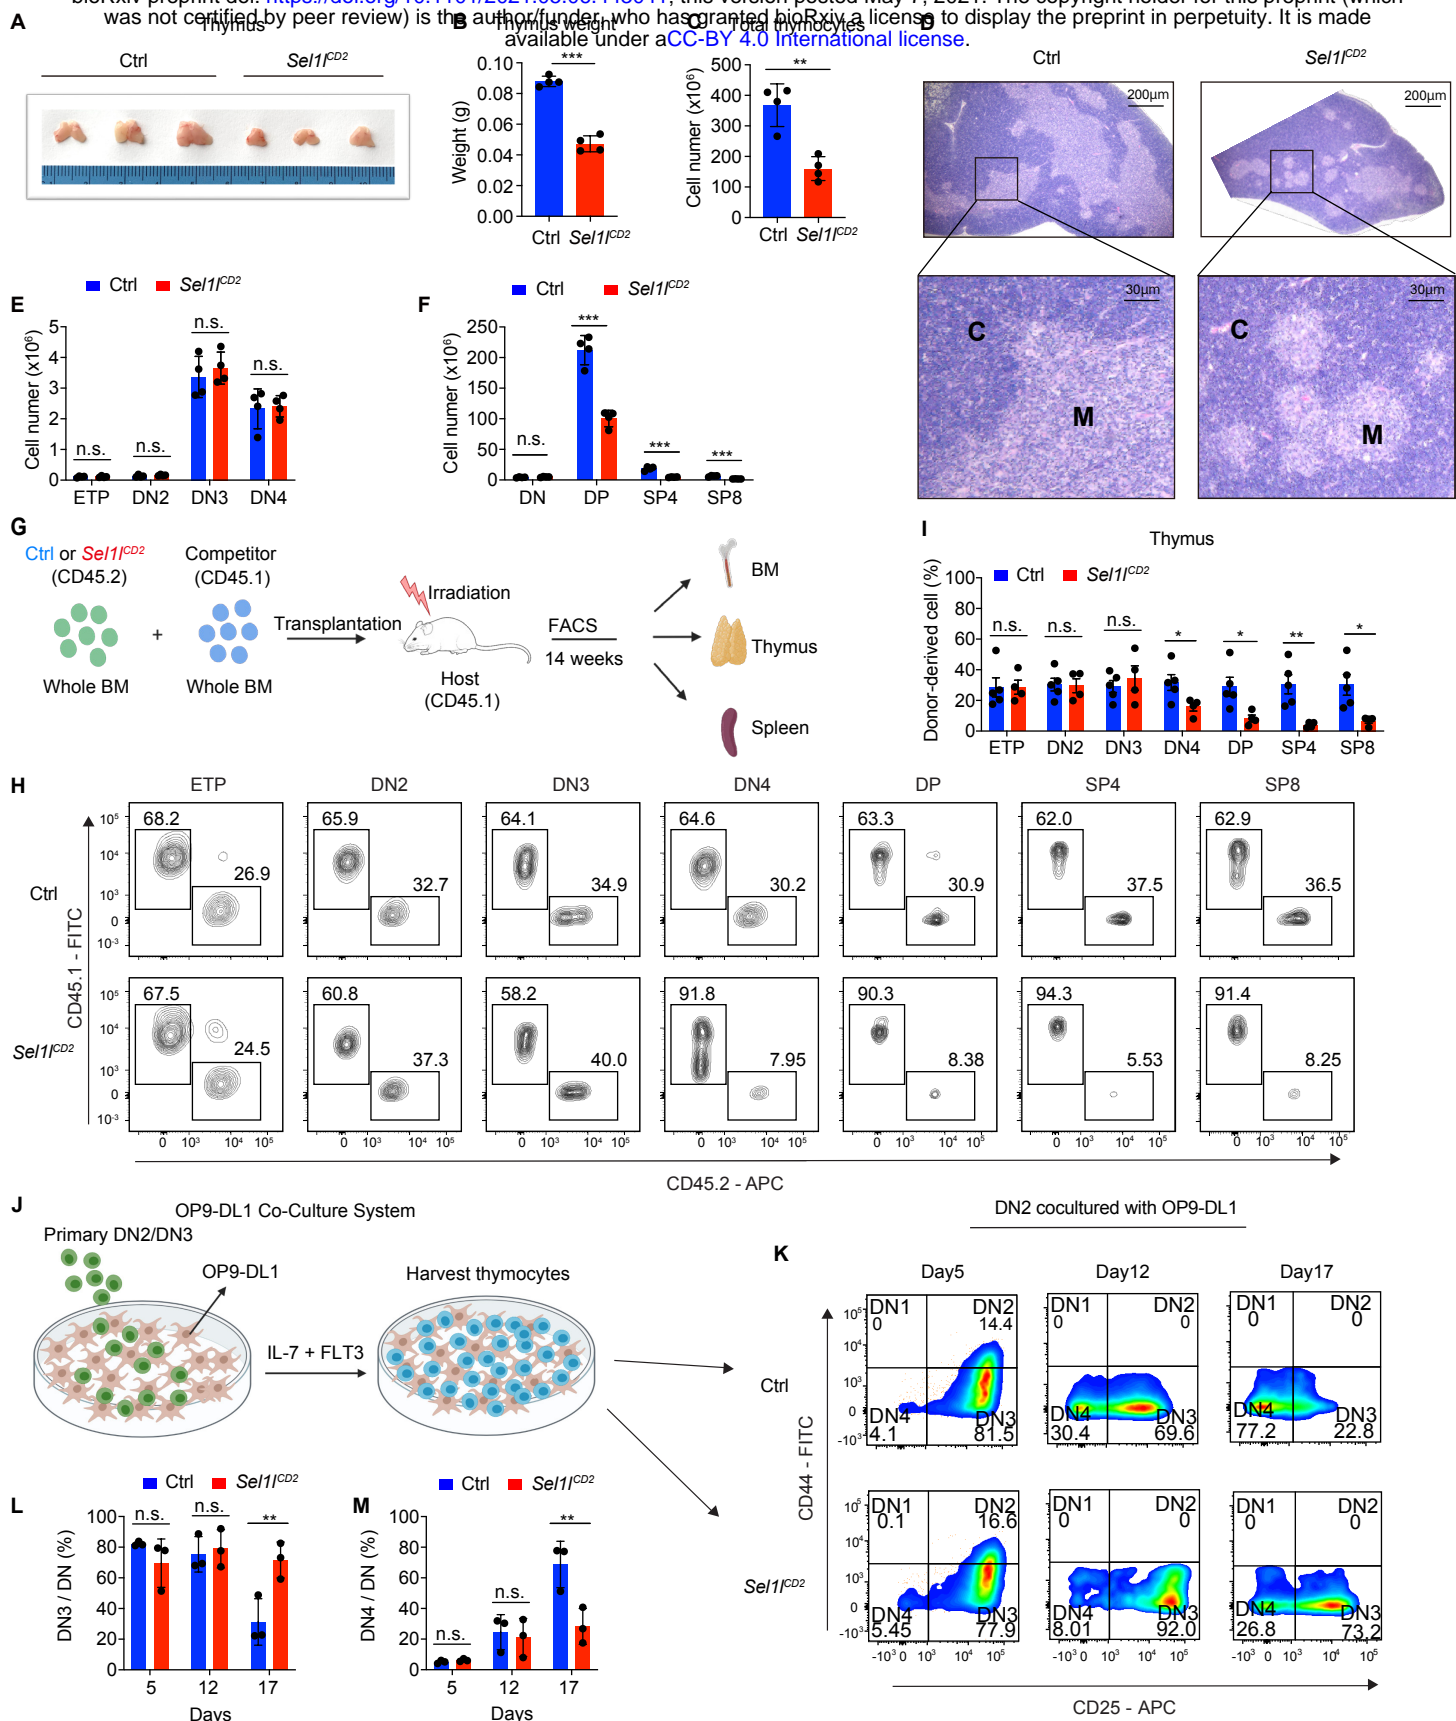

**Figure 2. SEL1L is required for  $\alpha\beta$  T cell development.** (A), Images of thymus from 6-8-week-old control (Ctrl, *Sel1<sup>fllox/flox</sup>*) and *Sel1<sup>CD2</sup>* (*Sel1<sup>fllox/flox</sup>; hCD2-iCre*) mice.  $n=3$ . (B and C), Thymus weight (B) and thymus cellularity (C) of age and gender-matched control (Ctrl, *Sel1<sup>fllox/flox</sup>*) and *Sel1<sup>CD2</sup>*-KO (*Sel1<sup>fllox/flox</sup>; hCD2-iCre*) mice.  $n=4$ . (D), Representative images of H&E staining of thymus from 6-8-week-old control (Ctrl, *Sel1<sup>fllox/flox</sup>*) and *Sel1<sup>CD2</sup>*-KO (*Sel1<sup>fllox/flox</sup>; hCD2-iCre*) mice. Scale bars are indicated. C: Cortex. M: Medulla. (E and F), Quantification of cell numbers of the indicated thymocyte subsets in 6-8-week-old control (Ctrl, *Sel1<sup>fllox/flox</sup>*) and *Sel1<sup>CD2</sup>*-KO (*Sel1<sup>fllox/flox</sup>; hCD2-iCre*) mice.  $n=4$ . (G), Schematic depiction of the competitive bone marrow transplantation (BMT) experiment using whole bone marrow cells from control (Ctrl, *Sel1<sup>fllox/flox</sup>*) or *Sel1<sup>CD2</sup>*-KO (*Sel1<sup>fllox/flox</sup>; hCD2-iCre*) mice as donors. (H and I), Representative flow cytometry plots (H) and percentage (I) of control (Ctrl, *Sel1<sup>fllox/flox</sup>*) or *Sel1<sup>CD2</sup>*-KO donor-derived thymocyte subsets in the recipient mice 14 weeks after transplantation.  $n=4-5$ . (J), Schematic overview of OP9-DL1 cell co-culture system. Sorted DN2 or DN3 cells from control (Ctrl) or *Sel1<sup>CD2</sup>*-KO mice were cultured on a monolayer of OP9-DL1 cells supplemented with IL-7 and Flt3. (K, L, M), Representative pseudocolor plots (K) and percentage of DN3 (L) or DN4 (M) in DN thymocytes at indicated time points after *in vitro* co-culture of equal number of control (Ctrl, *Sel1<sup>fllox/flox</sup>*) or *Sel1<sup>CD2</sup>*-KO DN2 cells on OP9-DL1 cells supplemented with IL-7 and Flt3.  $n=3$ . Results are shown as mean  $\pm$  s.d. The statistical significance was calculated by two-tailed unpaired t-test (B, C, E, F, I) or Two-way ANOVA with Bonferroni test (L, M). \* $P < 0.05$ , \*\* $P < 0.01$ , \*\*\* $P < 0.001$ , \*\*\*\* $P < 0.0001$ , n.s., not significant.

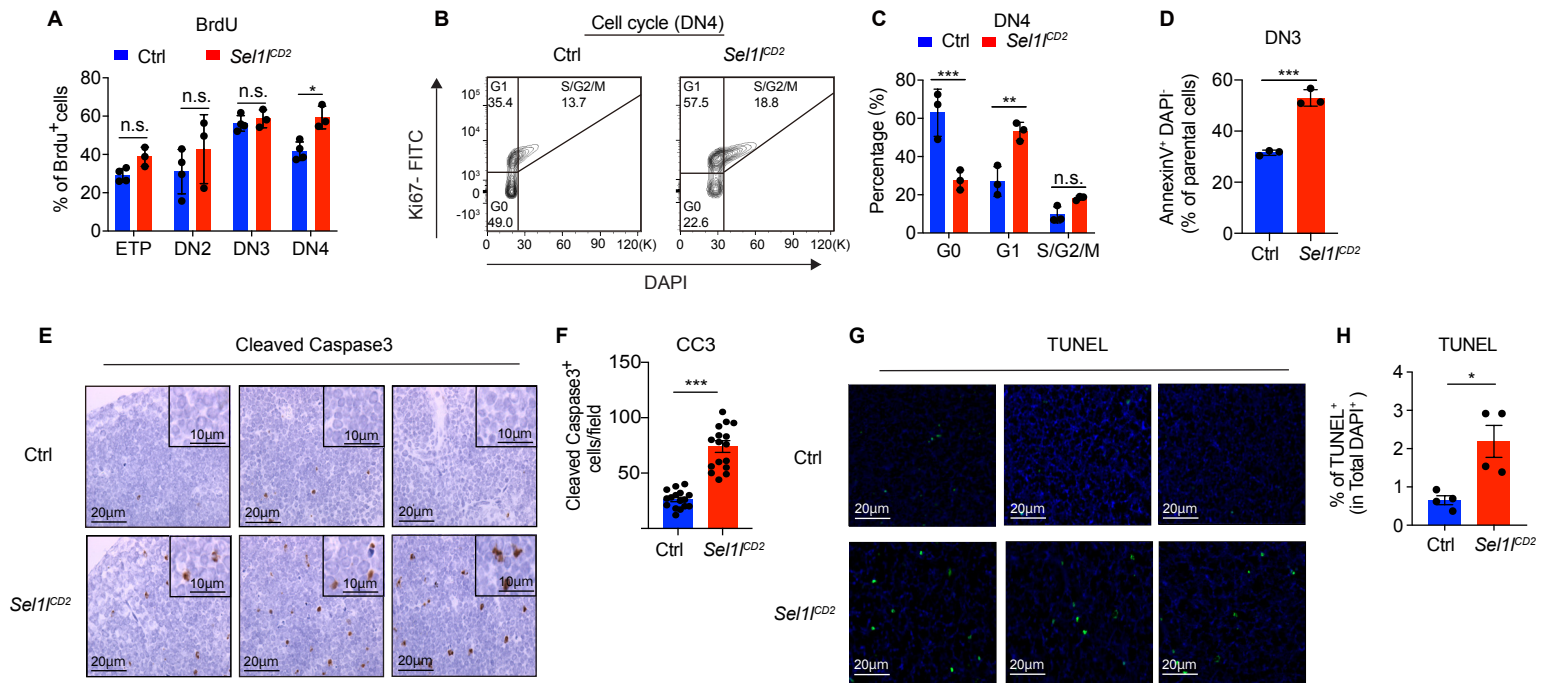

**Figure 3. SEL1L is required for thymocyte survival at the  $\beta$ -selection checkpoint.** (A), Quantification of BrdU incorporation in different thymocyte subsets from 6-week-old control (Ctrl, *Sel1<sup>fllox/fllox</sup>*) or *Sel1<sup>CD2</sup>*-KO mice.  $n=3-4$ . (B and C), Cell cycle analysis of DN4 thymocytes in 6-week-old control (Ctrl, *Sel1<sup>fllox/fllox</sup>*) and *Sel1<sup>CD2</sup>* mice using Ki67 and DAPI. Representative flow cytometry plots (B) and quantification (C) are shown.  $n=3$ . (D), Quantification of apoptotic Ctrl or *Sel1<sup>CD2</sup>*-KO DN3 thymocytes co-cultured with OP9-DL1 cells *in vitro* for 2 days.  $n=3$ . (E and F), Representative images (E) and quantification (F) of cleaved caspase-3 (CC3) positive cells in the thymus of 6-8-week-old control (Ctrl, *Sel1<sup>fllox/fllox</sup>*) or *Sel1<sup>CD2</sup>*-KO mice. 16 fields were counted at 20 $\times$  magnification from 4 Ctrl or *Sel1<sup>CD2</sup>* mice. Scale bars are indicated. (G and H), Representative images (G) and quantification (H) of TUNEL positive cells in the thymus of 6-8-week-old control (Ctrl, *Sel1<sup>fllox/fllox</sup>*) or *Sel1<sup>CD2</sup>* mice.  $n=4$ . Scale bar, 20  $\mu$ m. Results are shown as mean  $\pm$  s.d. The statistical significance was calculated by two-tailed unpaired t-test (D, F, H) or Two-way ANOVA with Bonferroni test (A, C). \* $P < 0.05$ , \*\* $P < 0.01$ , \*\*\* $P < 0.001$ , \*\*\*\* $P < 0.0001$ , n.s., not significant.

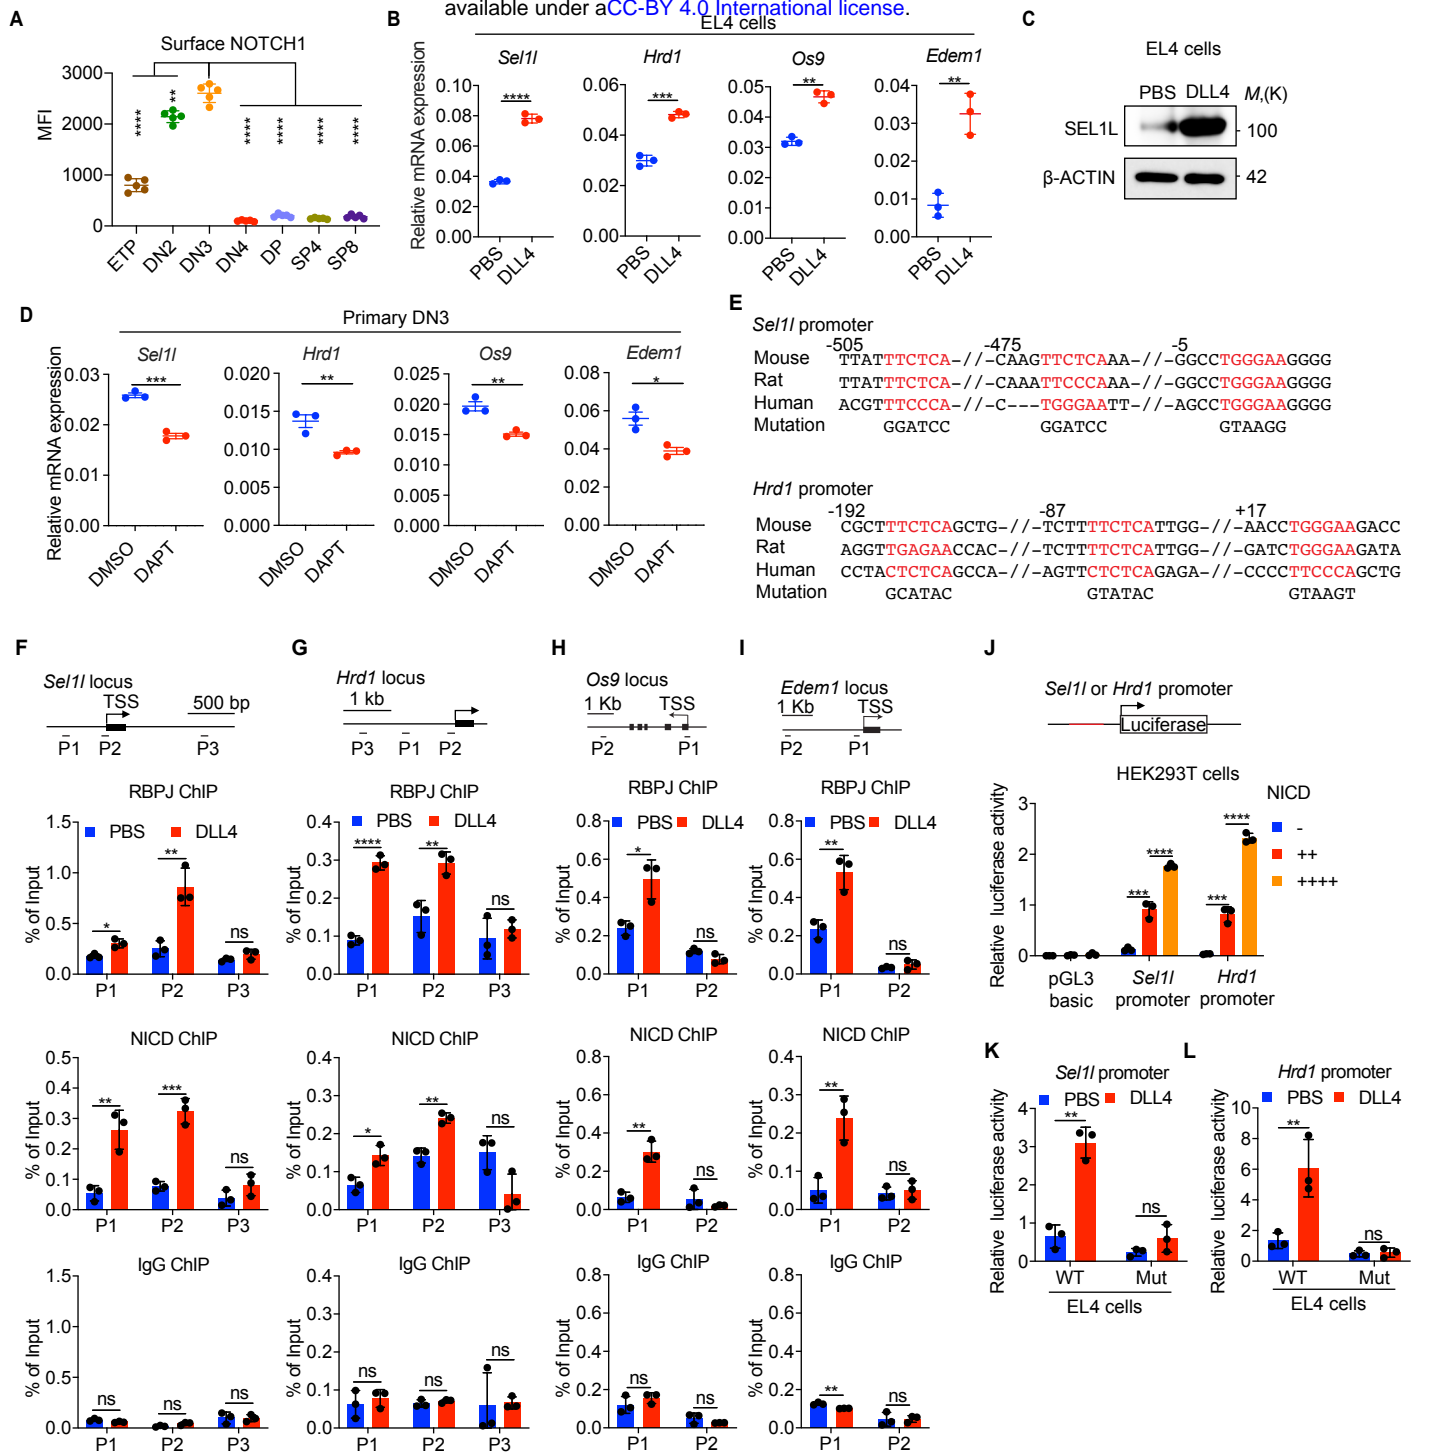

**Figure 4. Notch directly regulates transcription of ERAD genes.** (A), Quantification of surface NOTCH1 levels in different thymocyte subsets from wild-type mice. MFI, mean fluorescence intensity.  $n = 4$  mice. (B), Quantitative RT-PCR analysis of ERAD genes (*Sel1l*, *Hrd1*, *Os9*, *Edem1*) expression in EL4 cells after stimulation with 5  $\mu$ g/ml Delta ligand 4 (DLL4) for 24h. Data are presented relative to *Actb*.  $n = 3$ . (C), Western blot analysis of SEL1L level in EL4 cells after stimulation with Delta ligand 4 (DLL4) for 12h.  $\beta$ -ACTIN was used as loading control. (D), Quantitative RT-PCR analysis of ERAD genes (*Sel1l*, *Hrd1*, *Os9*, *Edem1*) expression in primary DN3 thymocytes treated with 2  $\mu$ M  $\gamma$ -secretase inhibitor DAPT for 5 h. Data are presented relative to *Actb*.  $n = 3$ . (E), Conserved RBPJ binding motif (Red) within the promoters of *Sel1l* (Upper) or *Hrd1* (lower) promoter from human, mouse and rat. The numbering corresponds to the mouse sequence and is relative to the transcription start site (TSS). Mutations of the RBPJ binding motifs within *Sel1l* or *Hrd1* promoter luciferase reporters (as in L, M) are shown. (F-I), Upper: Schematic diagram of the ChIP primer (P1-P3) locations across the *Sel1l* (F), *Hrd1* (G), *Os9* (H), or *Edem1* (I) promoter regions. TSS: transcription start site. Lower: Chromatin extracts from EL4 cells treated with PBS or 5  $\mu$ g/ml DLL4 for 24h were subjected to ChIP using anti-RBPJ antibody, anti-NICD antibody, or normal rabbit IgG. Genomic regions of *Sel1l* (F), *Hrd1* (G), *Os9* (H), or *Edem1* (I) promoter (as in left panel) were tested for enrichment of RBPJ, NICD or IgG. Data are shown as percentage of input. J, *Sel1l* or *Hrd1* promoter luciferase reporter was co-transfected with empty vector or different doses of NICD into HEK293T cells, and luciferase activity was measured 36 hours after transfection. pGL3 basic was used as control. (K and L), Wild-type or mutant (RBPJ motif mutations, as shown in e) *Sel1l* (K) or *Hrd1* (L) promoter luciferase reporter was transfected into EL4 cells which were treated with PBS or 5  $\mu$ g/ml DLL4 for 24 hours before harvest. Luciferase activity was measured 36 hours after transfection. All luciferase data are presented relative to Renilla readings. Data are shown as mean  $\pm$  s.d. Two-tailed Student's t-tests (A, B, D, F-I, K, L) or One-way ANOVA with Bonferroni test (J) were used to calculate  $P$  values. ns, not significant, \* $P < 0.05$ , \*\* $P < 0.01$ , \*\*\* $P < 0.001$ , \*\*\*\* $P < 0.0001$ .



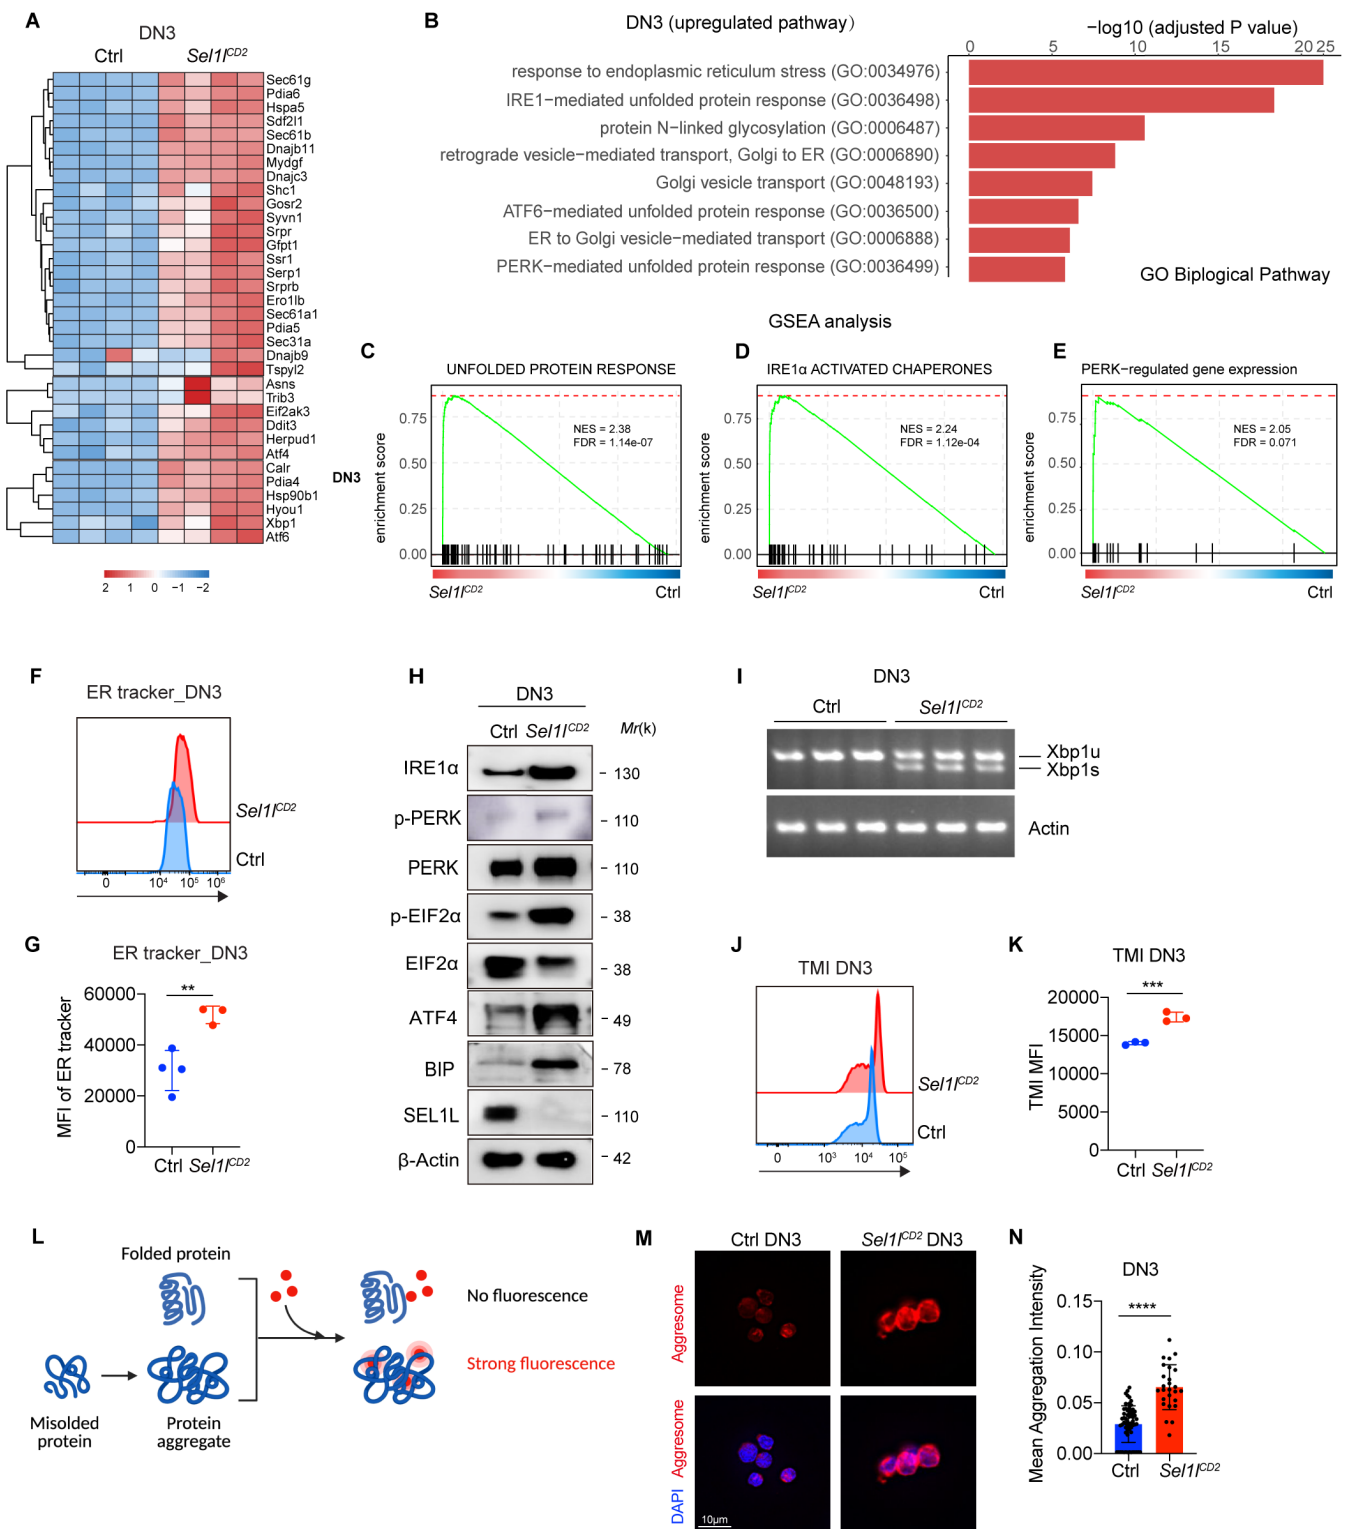

**Figure 5. *Sel1*-deficiency triggers unresolved ER stress during  $\beta$ -selection.** (A), Heatmap showing differentially expressed genes from the RNA-seq analysis of DN3 thymocytes sorted from control (Ctrl, *Sel1<sup>fllox/fllox</sup>*) or *Sel1<sup>CD2</sup>*-KO mice. *n*=4. (B), Gene Ontology (GO) analysis of the most significantly upregulated pathways in *Sel1<sup>CD2</sup>*-KO DN3 thymocytes compared with control (Ctrl, *Sel1<sup>fllox/fllox</sup>*) DN3 thymocytes. (C-E), Plot from GSEA analysis showing enrichment of Unfolded Protein Response (C), IRE1 $\alpha$  (D), and PERK (E) pathways in *Sel1<sup>CD2</sup>*-KO DN3 thymocytes compared to control (Ctrl, *Sel1<sup>fllox/fllox</sup>*) DN3 thymocytes. (F and G), Representative histogram (F) and quantification (G) of ER-tracker staining in DN3 thymocytes sorted from control (Ctrl, *Sel1<sup>fllox/fllox</sup>*) and *Sel1<sup>CD2</sup>*-KO mice. Ctrl: *n*=4; *Sel1<sup>CD2</sup>*-KO: *n*=3. MFI, mean fluorescence intensity. (H), Western blot analysis of UPR pathway markers in primary DN3 thymocytes sorted from 6-week-old Ctrl or *Sel1<sup>CD2</sup>*-KO mice.  $\beta$ -ACTIN was used as loading control. (I), PCR analysis of XBP1-splicing in DN3 thymocytes sorted from Ctrl or *Sel1<sup>CD2</sup>* mice. Xbp1u: Unspliced Xbp1; Xbp1s: Spliced Xbp1.  $\beta$ -ACTIN was used as loading control. (J and K), Representative histogram (J) and quantification (K) of unfolded/misfolded protein level measured by TMI in DN3 thymocytes sorted from Ctrl or *Sel1<sup>CD2</sup>*-KO mice. *n* = 3. (L), Schematic illustration of labeling and detection of misfolded and aggregated proteins with ProteoStat dye. (M and N), Representative images (M) and quantification (N) of protein aggregation measured by ProteoStat Protein Aggregation Detection Kit in primary DN3 thymocytes sorted from 3 pooled Ctrl or *Sel1<sup>CD2</sup>* mice. Results are shown as mean  $\pm$  s.d. Two-tailed Student's *t*-tests (G, K, N) was used to calculate *P* values. \*\**P* < 0.01, \*\*\**P* < 0.001, \*\*\*\**P* < 0.0001.

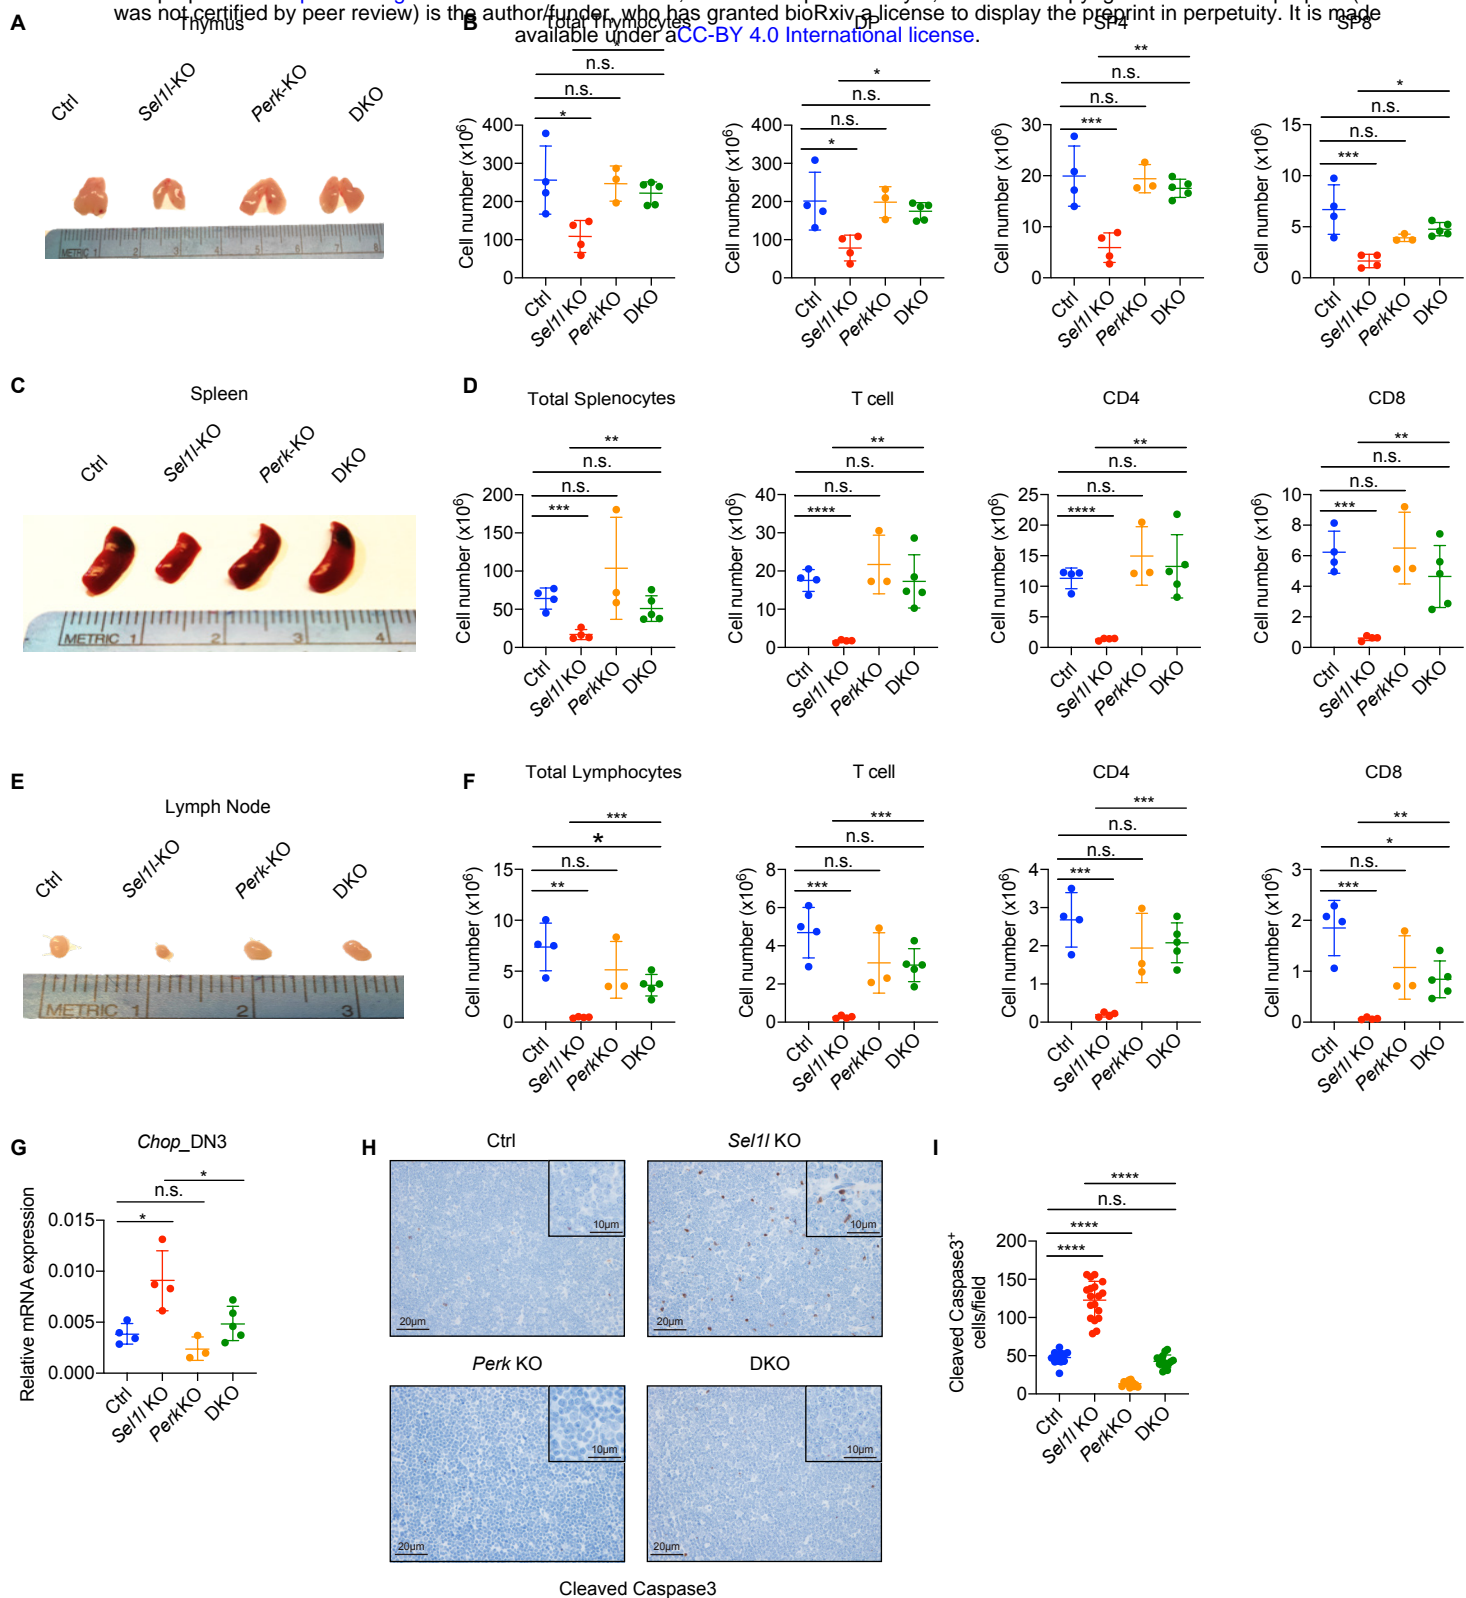

**Figure 6. PERK signaling drives  $\beta$ -selected thymocyte apoptosis in *Sel1l*<sup>CD2-KO</sup> mouse.** (A and B), Representative images of thymus (A) and quantification of total thymocytes, DP, SP4 and SP8 thymocytes (B) from age (6-week-old) and gender-matched control (Ctrl, *Sel1l*<sup>fllox/fllox</sup>), *Sel1l*-KO (*Sel1l*<sup>fllox/fllox</sup>; *hCD2-iCre*), *Perk*-KO (*Perk*<sup>fllox/fllox</sup>; *hCD2-iCre*) and *Sel1l/Perk* double knockout (DKO, *Sel1l*<sup>fllox/fllox</sup>; *Perk*<sup>fllox/fllox</sup>; *hCD2-iCre*) mice.  $n = 3-5$  each group. (C and D), Representative images of spleen (C) and quantification of total splenocytes, total CD3<sup>+</sup> T cells, CD4<sup>+</sup> T cells, and CD8<sup>+</sup> T cells (D) from the same mice with indicated genotype as in A and B.  $n = 3-5$  each group. (E and F), Representative images of the inguinal (left) lymph node (E) and quantification of total lymphocytes, total CD3<sup>+</sup> T cells, CD4<sup>+</sup> T cells, and CD8<sup>+</sup> T cells (F) from the same mice with indicated genotype as in A and B.  $n = 3-5$  each group. g. Quantitative RT-PCR analysis of *Chop* expression in DN3 thymocytes sorted from mice with indicated genotype.  $n = 3-5$  each group. (H and I), Representative images (H) and quantification (I) of cleaved caspase-3 (CC3) positive cells in the thymus of 6-8-week-old gender-matched mice with indicated genotype. 12 fields were counted at 20 $\times$  magnification from 4 mice with indicated genotype. Scale bars are indicated. Data are representative of three independent experiments and are shown as mean  $\pm$  s.d. The statistical significance was calculated by two-tailed unpaired t-test (D, F), One-way ANOVA with Turkey test (B, G) or One-way ANOVA with Bonferroni test (I). ns, not significant, \* $P < 0.05$ , \*\* $P < 0.01$ , \*\*\* $P < 0.001$ , \*\*\*\* $P < 0.0001$ .

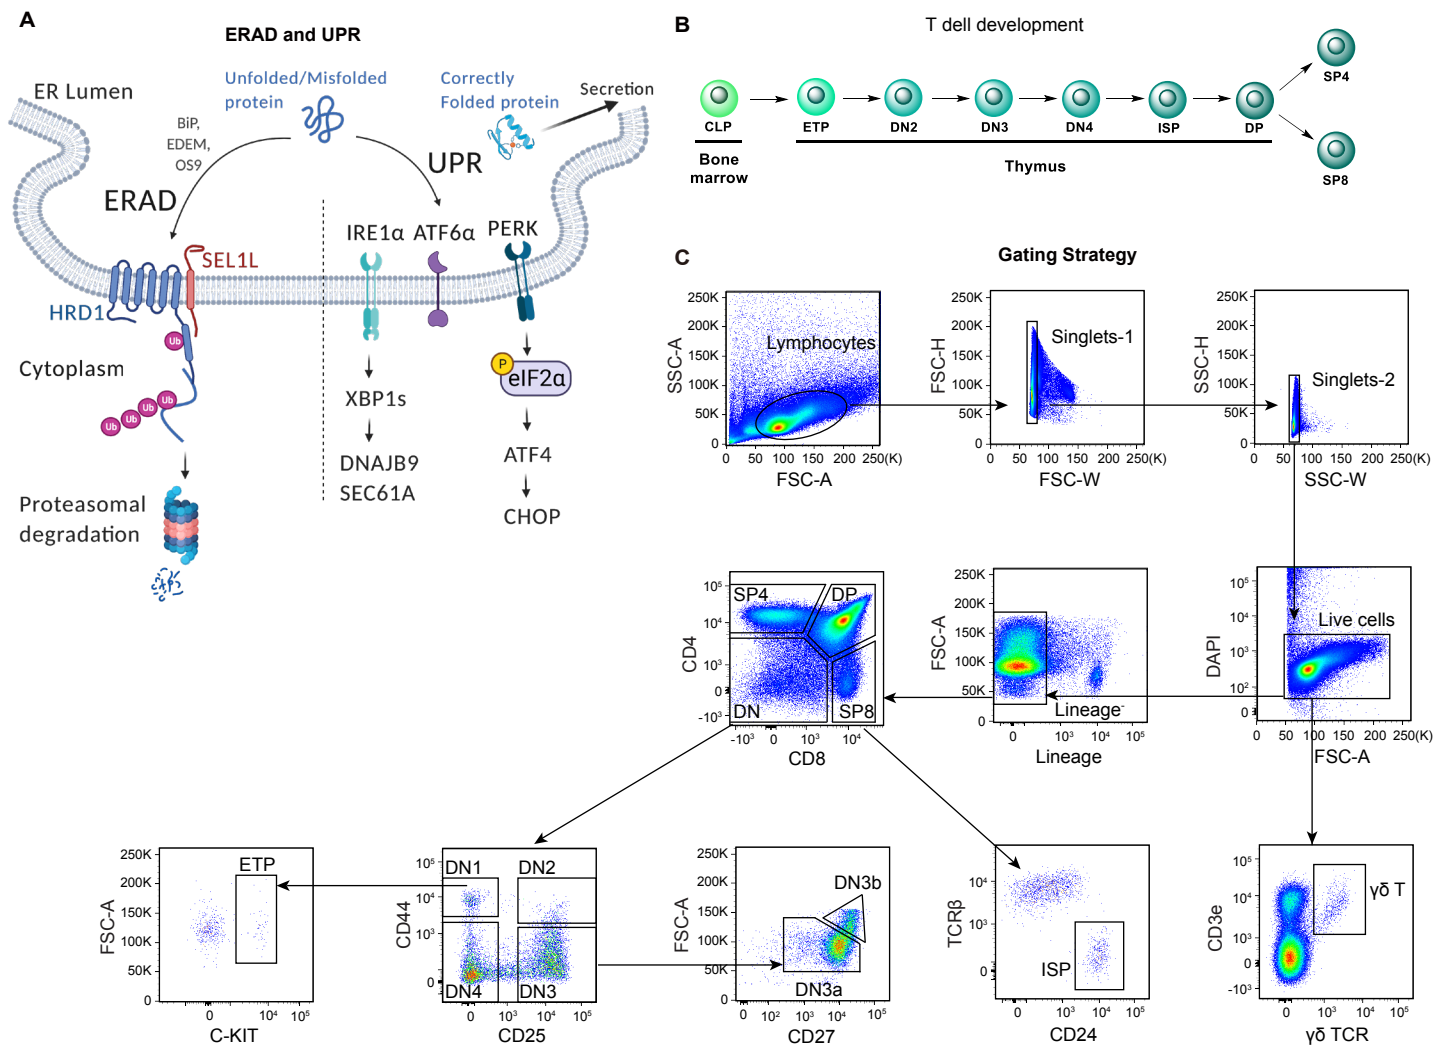

**Figure 1 - figure supplement 1. Diagrams and representative flow cytometry gates used in this study. (A)**, Diagram showing two ER quality control machineries: ERAD and UPR. The E3 ubiquitin ligase HRD1 and its adaptor protein SEL1L is the most conserved ERAD complex in mammals. While correctly folded proteins exit the ER, misfolded proteins in the ER are recruited to the SEL1L-HRD1 complex through ER chaperones (such as BiP, EDEM, and OS9), and then retrotranslocated into the cytosol, ubiquitinated and degraded by the proteasome. Failure to clear the misfolded or unfolded proteins in the ER activates the UPR signaling through three ER stress sensors IRE1 $\alpha$ , ATF6 and PERK. Upon activation, IRE1 $\alpha$  oligomerizes and undergoes *trans*-autophosphorylation to activate its RNase domain, resulting in the removal of 26 nucleotides from unspliced *XBPI* (*XBPIu*) mRNA to produce mature, spliced *XBPI* (*XBPIs*) mRNA. PERK is a serine-threonine kinase. ER stress induces PERK-dependent eIF2 $\alpha$  phosphorylation and subsequent increased cap-independent translation of ATF4 and induction of CHOP. **(B)**, Schematic diagram of T-cell development in the thymus. CLP: common lymphoid progenitors; ETP: early T lineage precursor (Lin<sup>-</sup> CD4<sup>-</sup> CD8<sup>-</sup> CD44<sup>+</sup> CD25<sup>-</sup> CD117<sup>+</sup>); DN2: double negative 2 thymocytes (Lin<sup>-</sup> CD4<sup>-</sup> CD8<sup>-</sup> CD44<sup>+</sup> CD25<sup>+</sup>); DN3: double negative 3 thymocytes (Lin<sup>-</sup> CD4<sup>-</sup> CD8<sup>-</sup> CD44<sup>-</sup> CD25<sup>+</sup>); DN4: double negative 4 thymocytes (Lin<sup>-</sup> CD4<sup>-</sup> CD8<sup>-</sup> CD44<sup>-</sup> CD25<sup>+</sup>); ISP: immature single-positive thymocytes (Lin<sup>-</sup> CD8<sup>+</sup> CD24<sup>+</sup> TCR $\beta$ ); DP: double positive thymocytes (Lin<sup>-</sup> CD4<sup>+</sup> CD8<sup>+</sup>); SP4: CD4 single positive thymocytes (Lin<sup>-</sup> CD4<sup>+</sup> CD8<sup>-</sup>); SP8: CD8 single positive thymocytes (Lin<sup>-</sup> CD4<sup>-</sup> CD8<sup>+</sup>). **(C)**, Representative pseudocolor plots showing the gating strategy to identify different thymocyte subsets in the thymus.

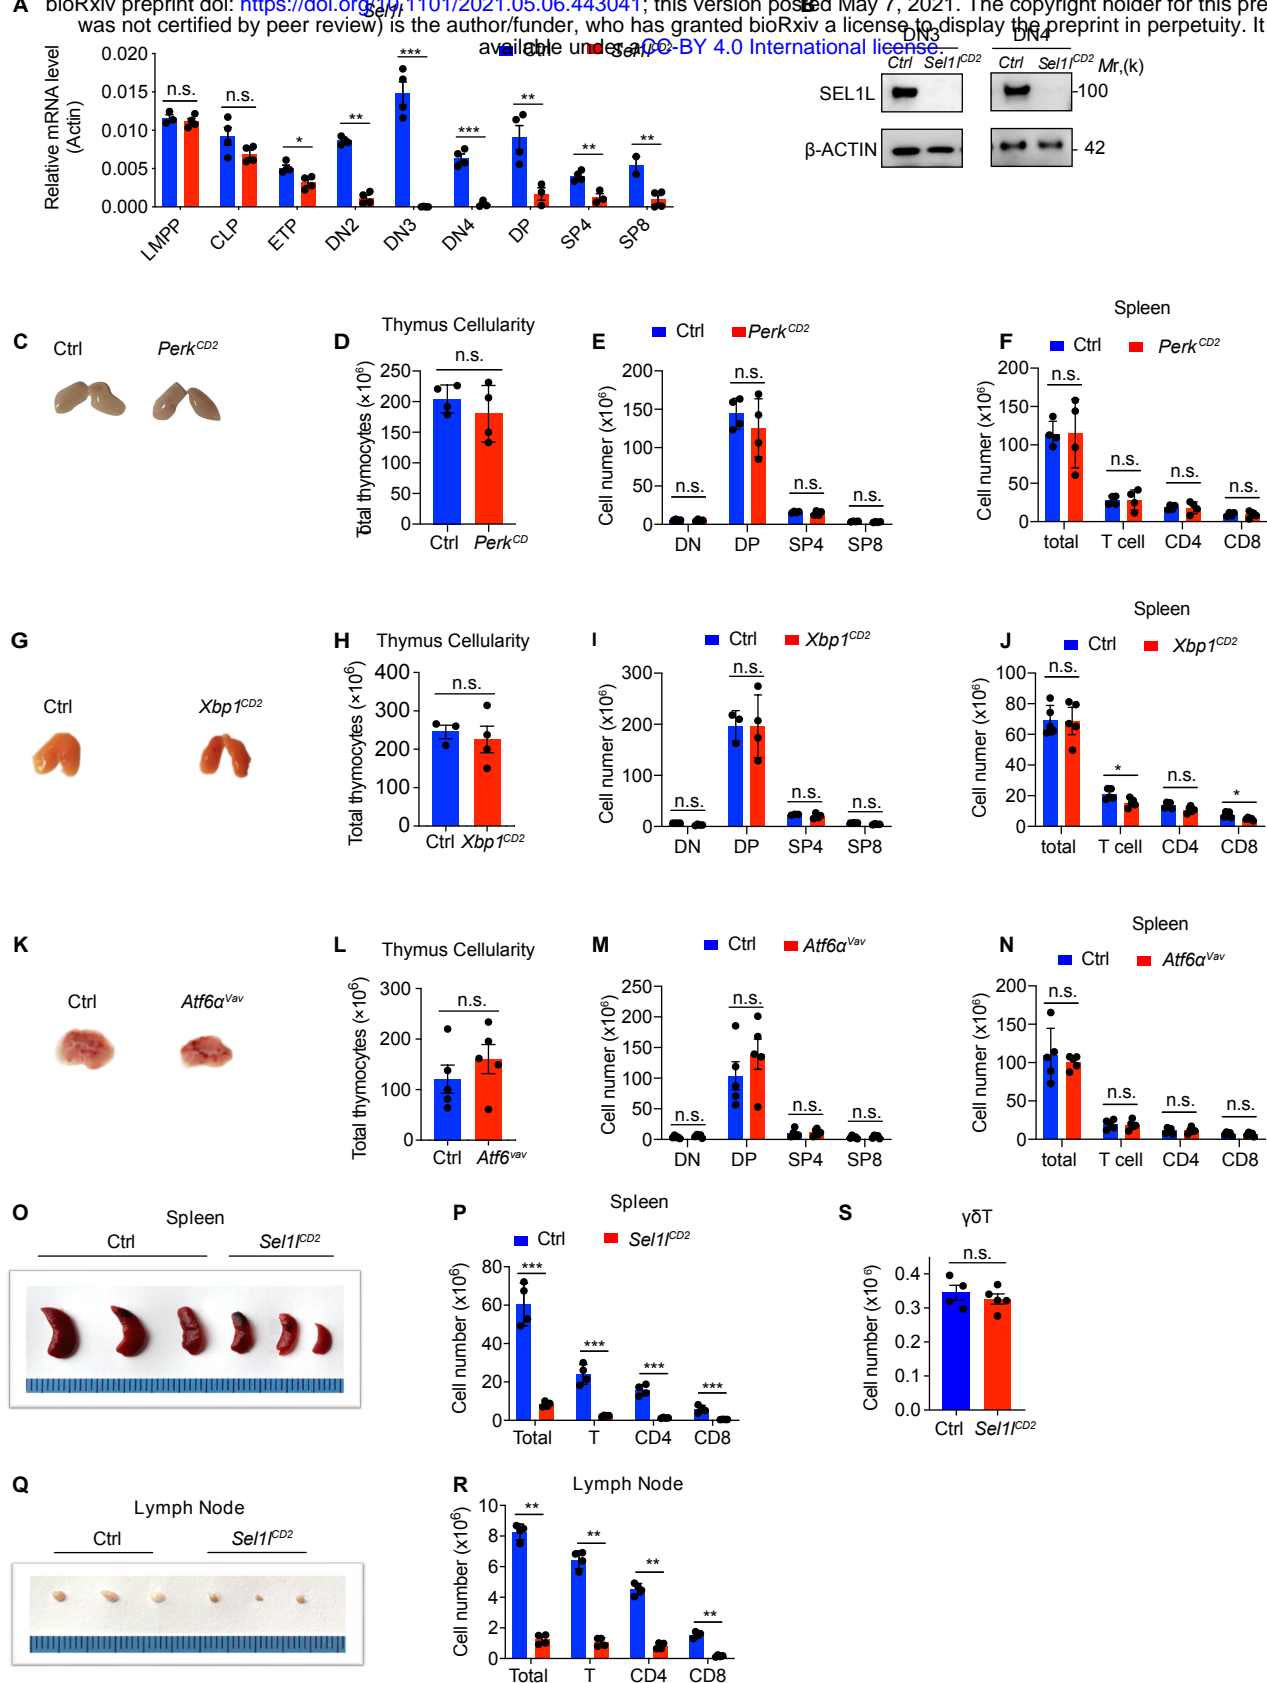

**Figure 2 - figure supplement 1. UPR is dispensable for  $\alpha\beta$  T cell development.** (**A**), Quantitative RT-PCR analysis of *Sel11* expression in murine bone marrow progenitors and different thymocyte subsets from control (Ctrl, *Sel11<sup>fllox/fllox</sup>*) or *Sel11<sup>CD2-KO</sup>* (*Sel11<sup>fllox/fllox</sup>; hCD2-iCre*) mice. Data are presented relative to *Actin*. *n* = 4. LMPP: lymphoid-primed multipotent progenitor. (**B**), Western blot analysis of SEL1L protein in sorted DN3 and DN4 thymocytes from Ctrl or *Sel11<sup>CD2</sup>* mice.  $\beta$ -ACTIN was used as loading control. (**C-F**), Representative images of thymus (**C**), thymus cellularity (**D**), cell numbers of indicated populations in the thymus (**E**) and peripheral splenocyte numbers of indicated populations (**F**) from age and gender-matched control (Ctrl, *Perk<sup>fllox/fllox</sup>*) or *Perk<sup>CD2-KO</sup>* (*Perk<sup>fllox/fllox</sup>; hCD2-iCre*) mice. *n* = 4. (**G-J**), Representative images of thymus (**G**), thymus cellularity (**H**), cell numbers of indicated populations in the thymus (**I**) and peripheral splenocyte numbers of indicated populations (**J**) from age and gender-matched control (Ctrl, *Xbp1<sup>fllox/fllox</sup>*) or *Xbp1<sup>CD2-KO</sup>* (*Xbp1<sup>fllox/fllox</sup>; hCD2-iCre*) mice. *n* = 3-4. (**K-N**), Representative images of thymus (**K**), thymus cellularity (**L**), cell numbers of indicated populations in the thymus (**M**) and peripheral splenocyte numbers of indicated populations (**N**) from age and gender-matched control (Ctrl, *Atf6<sup>fllox/fllox</sup>*) and *Atf6<sup>Vav</sup>*-KO (*Atf6<sup>fllox/fllox</sup>; Vav-iCre*) mice. *n* = 5. (**O**), Images of spleen from 6-8 week-old control (Ctrl, *Sel11<sup>fllox/fllox</sup>*) and *Sel11<sup>CD2-KO</sup>* (*Sel11<sup>fllox/fllox</sup>; hCD2-iCre*) mice. (**P**), Quantification of cell numbers of the indicated populations in the spleen of 6-8 week-old control (Ctrl, *Sel11<sup>fllox/fllox</sup>*) and *Sel11<sup>CD2-KO</sup>* (*Sel11<sup>fllox/fllox</sup>; hCD2-iCre*) mice. (**Q**), Images of the inguinal (left) lymph nodes from 6-8 week-old control (Ctrl, *Sel11<sup>fllox/fllox</sup>*) and *Sel11<sup>CD2-KO</sup>* (*Sel11<sup>fllox/fllox</sup>; hCD2-iCre*) mice. *n* = 4. (**R**), Quantification of cell numbers in the lymph nodes of 6-8 week-old control (Ctrl, *Sel11<sup>fllox/fllox</sup>*) and *Sel11<sup>CD2-KO</sup>* (*Sel11<sup>fllox/fllox</sup>; hCD2-iCre*) mice. *n* = 4. (**S**), Quantification of cell numbers of  $\gamma\delta$  T cells from 6-8 week-old control (Ctrl, *Sel11<sup>fllox/fllox</sup>*) and *Sel11<sup>CD2-KO</sup>* (*Sel11<sup>fllox/fllox</sup>; hCD2-iCre*) mice. Ctrl: *n* = 4. *Sel11<sup>CD2-KO</sup>*: *n* = 5. Data are representative of three independent experiments and are shown as mean  $\pm$  s.d. Two-tailed Student's *t*-tests (**A**, **D-F**, **H-J**, **L-N**, **P**, **R**, **S**) was used to calculate *P* values. n.s., not significant, \**P* < 0.05, \*\**P* < 0.01, \*\*\**P* < 0.001, \*\*\*\**P* < 0.0001.

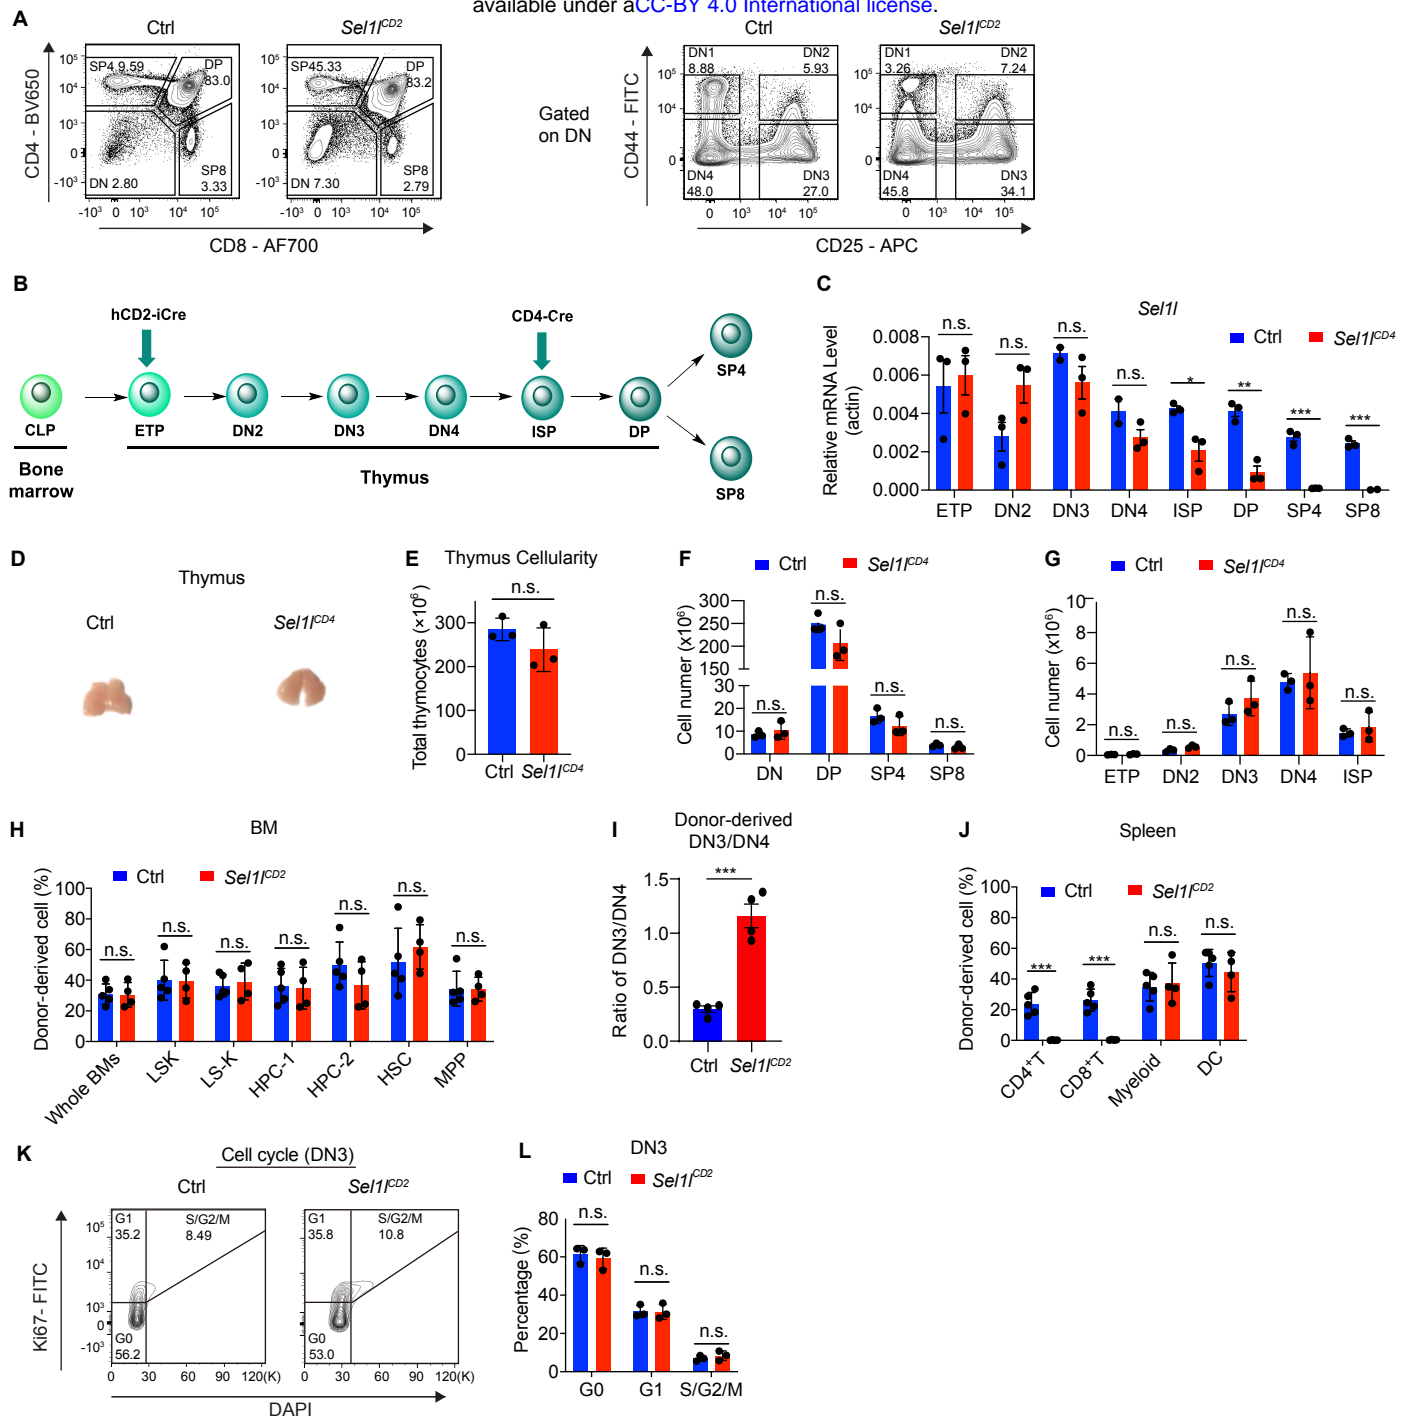

**Figure 2 - figure supplement 2. SEL1L is required for DN to DP thymocyte transition following  $\beta$  selection.** (A), Representative flow cytometry plots of different thymocyte subsets in control (Ctrl, *Sel1*<sup>flx/flx</sup>) and *Sel1*<sup>CD2</sup>-KO (*Sel1*<sup>flx/flx</sup>, *hCD2-iCre*) mice. (B), Diagram showing different stages of *hCD2-iCre* and *CD4-iCre* initiated gene depletion during T cell development. (C), Quantitative RT-PCR analysis of *Sel1* in different thymocyte subsets from control (Ctrl, *Sel1*<sup>flx/flx</sup>) and *Sel1*<sup>CD4</sup>-KO (*Sel1*<sup>flx/flx</sup>; *CD4-iCre*) mice. Data are presented relative to *Actin*.  $n = 3$ . (D and E), Representative images of thymus (D) and quantification of thymus cellularity (E) in 6-8 week-old control (Ctrl, *Sel1*<sup>flx/flx</sup>) and *Sel1*<sup>CD4</sup>-KO (*Sel1*<sup>flx/flx</sup>; *CD4-iCre*) mice.  $n = 3$ . (F and G), Quantification of cell numbers of different thymocyte subsets from control (Ctrl, *Sel1*<sup>flx/flx</sup>) and *Sel1*<sup>CD4</sup>-KO (*Sel1*<sup>flx/flx</sup>; *CD4-iCre*) mice.  $n = 3$ . (H), Percentage of Ctrl or *Sel1*<sup>CD2</sup>-KO donor-derived progenitors in the bone marrow of recipient mice 14 weeks after transplantation.  $n = 4-5$ . (I), Quantification of Ctrl or *Sel1*<sup>CD2</sup>-KO donor-derived DN3/DN4 ratio.  $n = 4-5$ . (J), Percentage of Ctrl or *Sel1*<sup>CD2</sup>-KO donor-derived CD4<sup>+</sup> T cells, CD8<sup>+</sup> T cells, myeloid cells, and dendritic cells (DC) in the spleen of recipient mice 14 weeks after transplantation.  $n = 4-5$ . (K and L), Cell cycle analysis of DN3 thymocytes in 6-week-old control (Ctrl) and *Sel1*<sup>CD2</sup> mice using Ki67 and DAPI. Representative flow cytometry plots (K) and quantification (L) are shown.  $n = 3$ . Data are shown as mean  $\pm$  s.d. The statistical significance was calculated by two-tailed unpaired t-test (C, E-J) or Two-way ANOVA with Bonferroni test (L). n.s., not significant, \* $P < 0.05$ , \*\* $P < 0.01$ , \*\*\* $P < 0.001$ , \*\*\*\* $P < 0.0001$ .

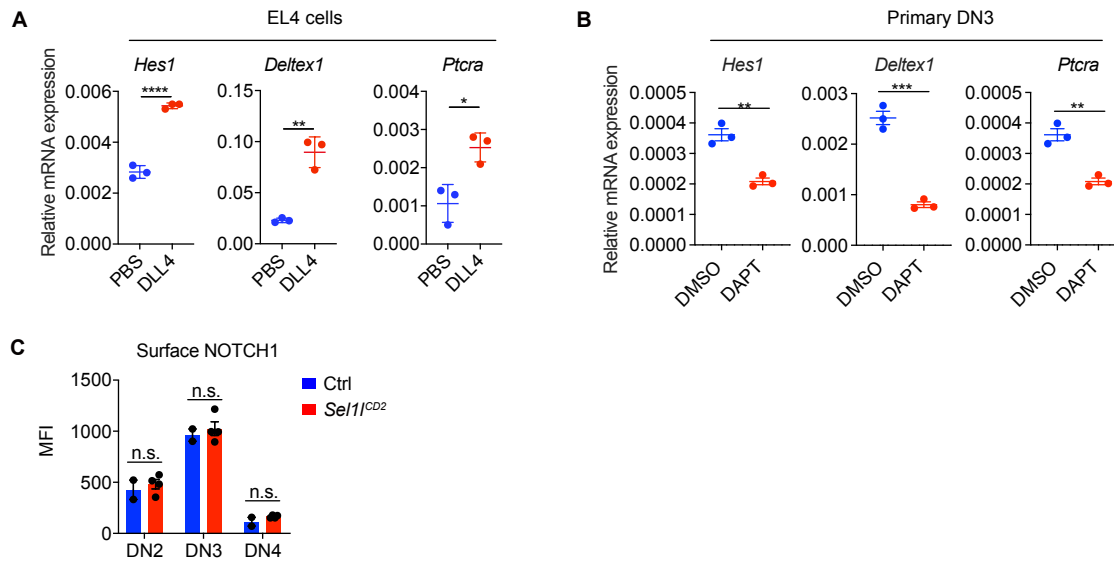

**Figure 4 - figure supplement 1. Notch signal regulates ERAD expression.** (A), Quantitative RT-PCR analysis of Notch target genes expression in EL4 cells after stimulation with with 5  $\mu\text{g/ml}$  Delta ligand 4 (DLL4) for 24h. Data are presented relative to *Actin*.  $n = 3$ . (B), Quantitative RT-PCR analysis of Notch target genes expression in primary DN3 thymocytes treated with 2  $\mu\text{M}$   $\gamma$ -secretase inhibitor DAPT for 5 hours. Data are presented relative to *Actin*.  $n = 3$ . (C), Expression of NOTCH1 on cell surface of different thymocyte subsets from control (Ctrl, *Sel11<sup>flax/flax</sup>*) and *Sel11<sup>CD2</sup>*-KO (*Sel11<sup>flax/flax</sup>*; hCD2-iCre) mice. Ctrl:  $n = 2$ , *Sel11<sup>CD2</sup>*-KO:  $n = 4$ . Data are shown as mean  $\pm$  s.d. Two-tailed Student's t-tests (A-C) was used to calculate  $P$  values. ns, not significant, \* $P < 0.05$ , \*\* $P < 0.01$ , \*\*\* $P < 0.001$ , \*\*\*\* $P < 0.0001$ .

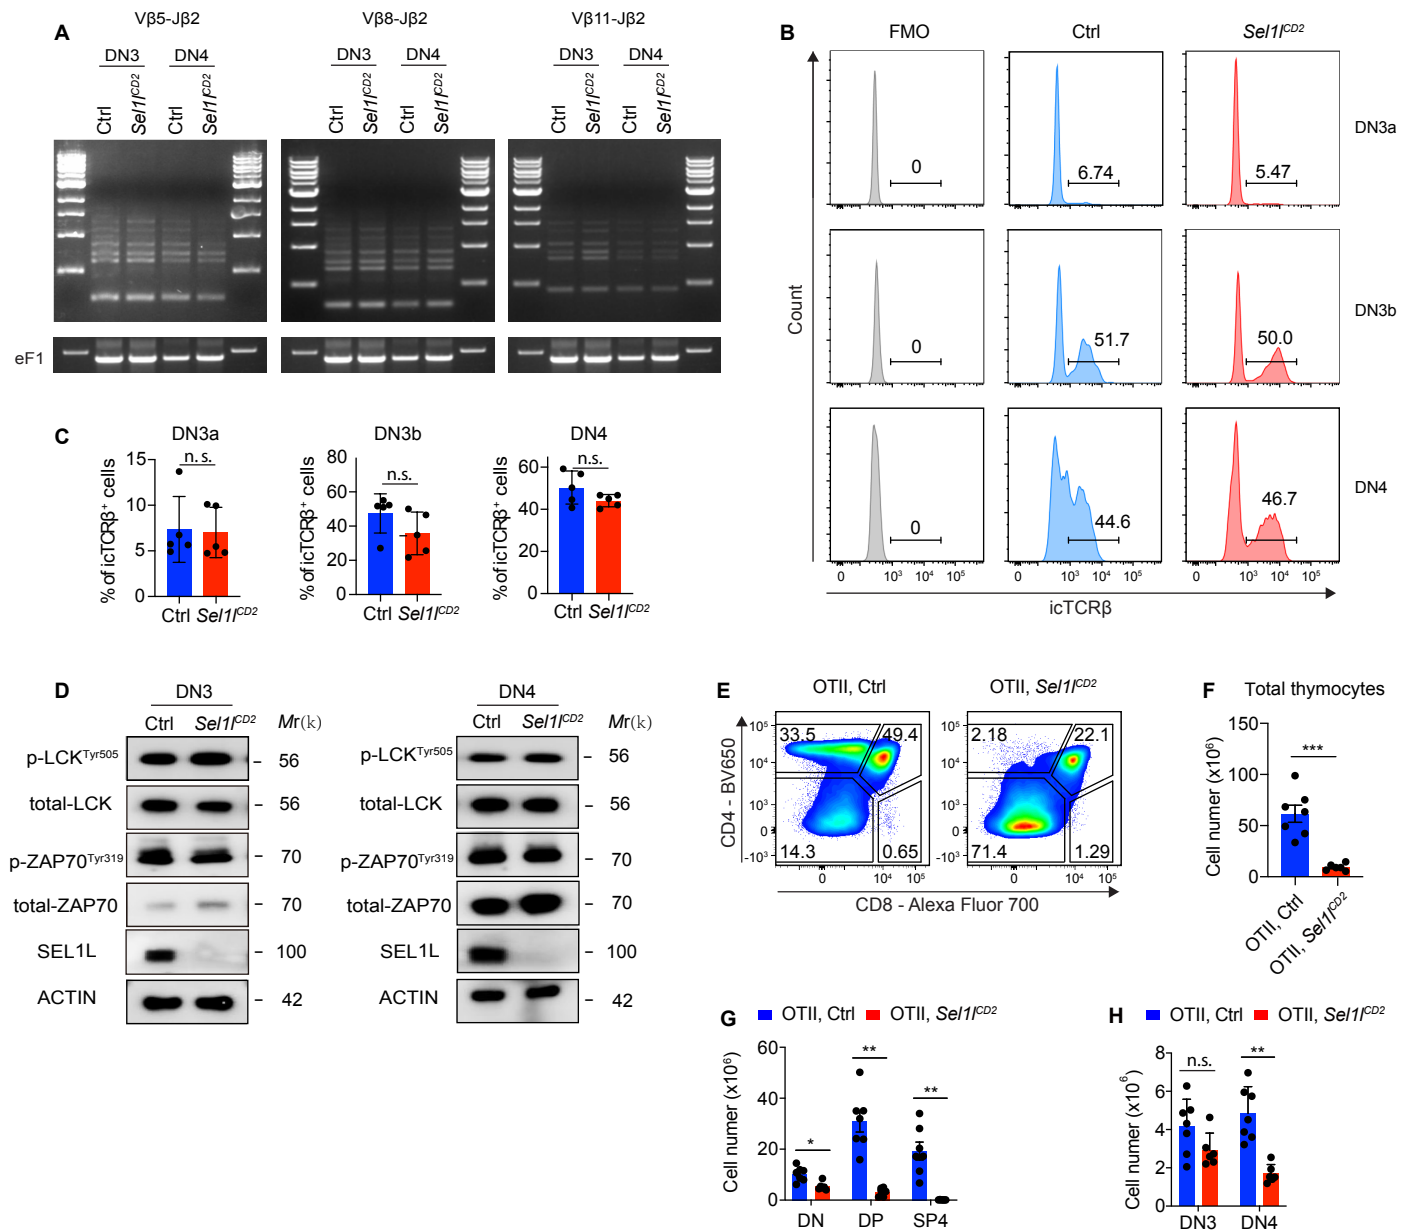

**Figure 5 - figure supplement 1. SEL1L is not required for TCR $\beta$  gene rearrangement and pre-TCR signaling.** (A), PCR analysis of *Vb5-Jb2*, *Vb8-Jb2* and *Vb11-Jb2* gene rearrangements using genomic DNA of DN3 and DN4 thymocytes sorted from control (Ctrl, *Sel1<sup>fllox/fllox</sup>*) or *Sel1<sup>CD2</sup>-KO* (*Sel1<sup>fllox/fllox</sup>; hCD2-iCre*) mice. (B and C), Representative flow cytometry plots (B) and quantification (C) of intracellular TCR $\beta$  positive cells in DN3a, DN3b and DN4 thymocytes from Ctrl or *Sel1<sup>CD2</sup>-KO* mice.  $n = 5$ . (D), Western blot analysis of the expression of proteins involved in pre-TCR signaling in primary DN3 and DN4 thymocytes sorted from Ctrl or *Sel1<sup>CD2</sup>* mice.  $\beta$ -ACTIN was used as loading control. (E-H), Representative pseudocolor plots (E), quantification of total thymocytes (F) and cell numbers of indicated populations (G and H) from OT-II.Ctrl (*OT-II; Sel1<sup>fllox/fllox</sup>*) or OT-II.*Sel1<sup>CD2</sup>* (*OT-II; Sel1<sup>fllox/fllox</sup>; hCD2-iCre*) mice. OT-II.Ctrl:  $n = 7$ . OT-II.*Sel1<sup>CD2</sup>*:  $n = 6$ . Data are shown as mean  $\pm$  s.d. Two-tailed Student's t-tests (C, F-H) was used to calculate  $P$  values. n.s., not significant, \* $P < 0.05$ , \*\* $P < 0.01$ , \*\*\* $P < 0.001$ , \*\*\*\* $P < 0.0001$ .

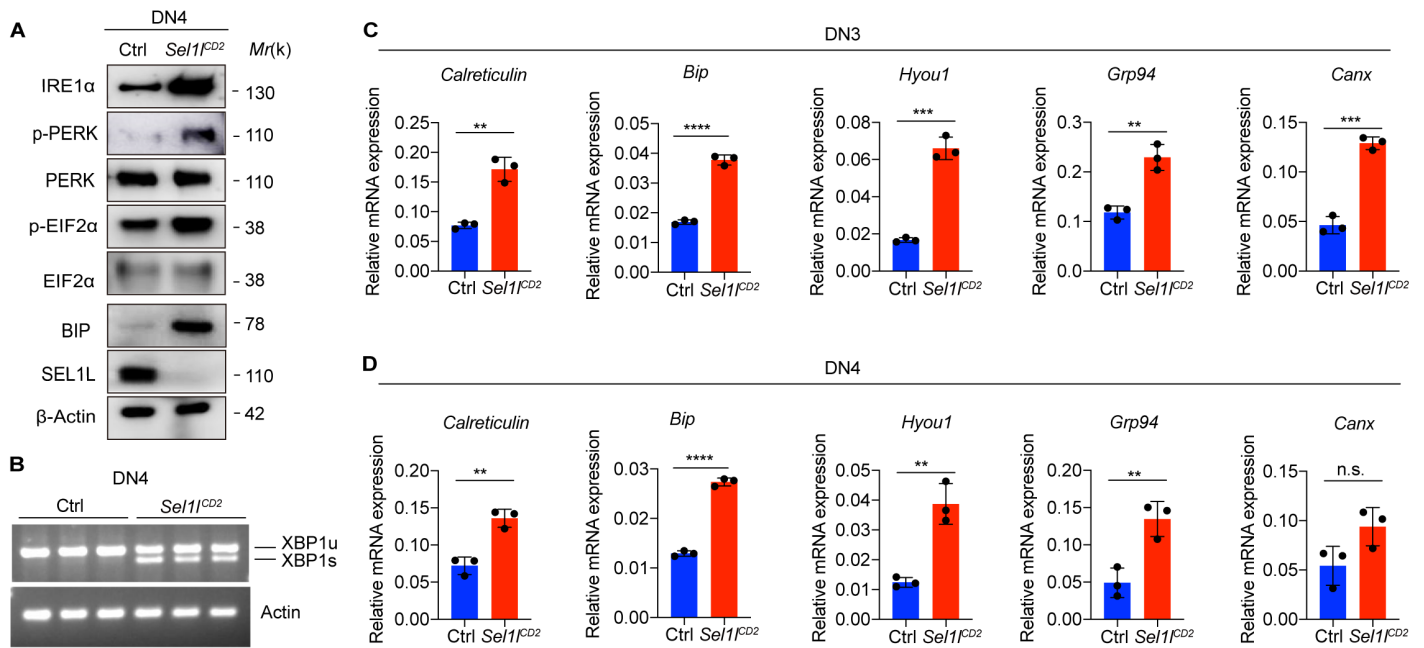

**Figure 5 - figure supplement 2. *Sel1l* knockout induces ER stress.** (A), Western blot analysis of UPR pathway markers in primary DN4 thymocytes sorted from 6-week-old Ctrl or *Sel1<sup>CD2</sup>*-KO mice. β-ACTIN was used as loading control. (B), PCR analysis of XBP1-splicing in DN4 thymocytes sorted from Ctrl or *Sel1<sup>CD2</sup>* mice. Xbp1u: Unspliced Xbp1; Xbp1s: Spliced Xbp1. β-ACTIN was used as loading control. (C and D), Quantitative RT-PCR analysis of ER chaperone genes expression in DN3 (C) and DN4 (D) thymocytes sorted from 6-week-old Ctrl or *Sel1<sup>CD2</sup>*-KO mice. Data are presented relative to *Actin*.  $n = 3$ . Data are shown as mean  $\pm$  s.d. Two-tailed Student's t-tests was used to calculate  $P$  values. n.s., not significant, \* $P < 0.05$ , \*\* $P < 0.01$ , \*\*\* $P < 0.001$ , \*\*\*\* $P < 0.0001$ .



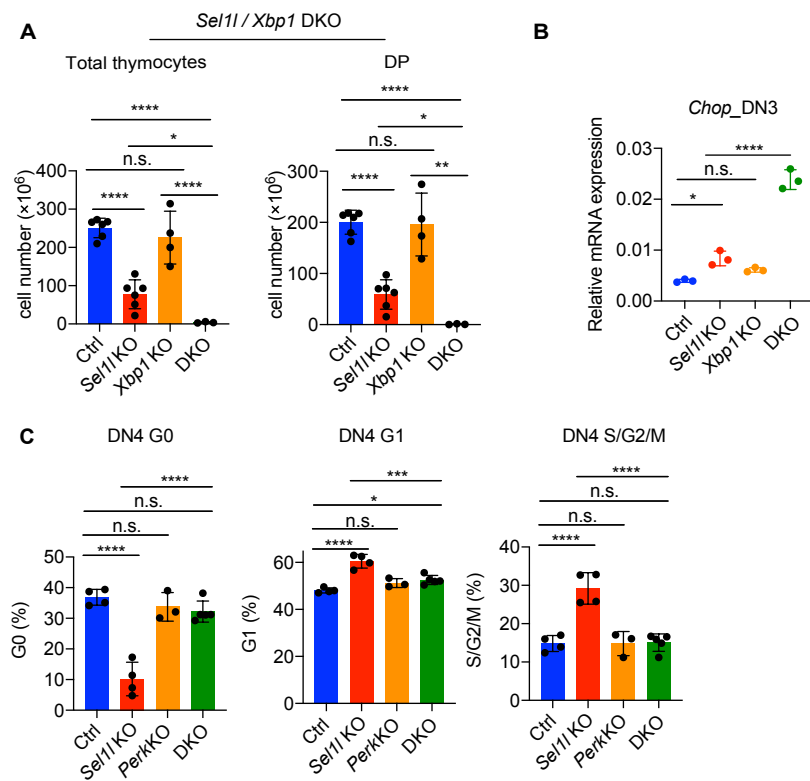

**Figure 6 - figure supplement 1. XBP1 functions as a compensatory adaptative mechanism in *Sel1l*-KO mouse.** (A), Quantification of total cellularity and DP cell numbers of 6-8 week-old gender-matched control (Ctrl, *Sel1l*<sup>fllox/fllox</sup>), *Sel1l*-KO (*Sel1l*<sup>fllox/fllox</sup>; *hCD2-iCre*), *Xbp1*-KO (*Xbp1*<sup>fllox/fllox</sup>; *hCD2-iCre*), and *Sel1l/Xbp1* double knockout (DKO, *Sel1l*<sup>fllox/fllox</sup>; *Xbp1*<sup>fllox/fllox</sup>; *hCD2-iCre*) mice.  $n = 3-6$ /each group. (B), Quantitative RT-PCR analysis *Chop* expression in DN3 thymocytes sorted from mice with indicated genotype. Data are presented relative to *Actin*. (C), Cell cycle analysis of DN4 thymocytes from age (6-week-old) and gender-matched control (Ctrl, *Sel1l*<sup>fllox/fllox</sup>), *Sel1l*-KO (*Sel1l*<sup>fllox/fllox</sup>; *hCD2-iCre*), *Perk*-KO (*Perk*<sup>fllox/fllox</sup>; *hCD2-iCre*) and *Sel1l/Perk* double knockout (DKO, *Sel1l*<sup>fllox/fllox</sup>; *Perk*<sup>fllox/fllox</sup>; *hCD2-iCre*) mice.  $n = 3-5$  each group. Data are shown as mean  $\pm$  s.d. The statistical significance was calculated by two-tailed unpaired t-test (A, B) or One-way ANOVA with Turkey test (C). \* $P < 0.05$ , \*\* $P < 0.01$ , \*\*\* $P < 0.001$ , \*\*\*\* $P < 0.0001$ .
